# Supplementary material
Source: publisher figshare collection journal article supplement (https://gsapubs.figshare.com/ndownloader/files/34909332)
Supplement: Supplementary file 1 [file 34909332]

## Sheet: Sheet2
T	1085	1058.92	1040.13	1075.92	1069.15	1062.49	1055.82	1048.92	1042.08	1035.19	1028.34	1021.43	1014.65	1007.98	1001.38	1019.8	1012.96	1006.27	999.839	993.706	988.627	1195.7	1190.7	1185.7	1180.7	1175.7	1170.7	1165.7	1160.7	1155.7	1150.7	1145.7	1140.7	1135.7	1130.7	1125.7	1120.7	1115.7	1110.7	1105.7	1100.7	1095.7	1090.7	1085.7	1080	1053.92	1035.13	1070.92	1064.15
Magma Chamber Process	AFC	AFC	AFC	AFC	AFC	AFC	AFC	AFC	AFC	AFC	AFC	AFC	AFC	AFC	AFC	AFC	AFC	AFC	AFC	AFC	AFC	FC	FC	FC	FC	FC	FC	FC	FC	FC	FC	FC	FC	FC	FC	FC	FC	FC	FC	FC	FC	FC	FC	FC	FC	FC	FC	FC	FC
SiO2	55.4122	57.7109	59.1945	57.8243	58.0783	58.3274	58.5833	58.9504	59.34	59.7417	60.3193	60.9898	61.6384	62.2537	62.8582	63.4325	63.9938	64.5787	65.1698	65.8089	66.0865	53.8238	53.8771	53.9298	53.982	54.0338	54.085	54.1357	54.1859	54.2356	54.2849	54.3337	54.382	54.4299	54.4773	54.5243	54.5804	54.6473	54.7154	54.7847	54.8557	55.0196	55.1804	55.3384	55.568	57.8766	59.4406	57.9085	58.1629
Magma Melt TiO2 (wt. %)	1.10662	1.04702	1.01577	1.00608	1.0026	0.998743	0.99419	1.00294	1.01379	1.02454	1.00536	0.987076	0.971041	0.958178	0.947474	0.780868	0.791865	0.801215	0.807226	0.807375	0.8113	0.972083	0.975799	0.979467	0.98309	0.986668	0.990201	0.993689	0.997134	1.00054	1.00389	1.00721	1.01049	1.01372	1.01691	1.02007	1.02501	1.03084	1.03578	1.03984	1.04314	1.06567	1.08772	1.10932	1.12768	1.06506	1.01751	1.00826	1.00413
Magma Melt Al2O3 (wt. %)	15.3903	14.8362	14.4166	14.5767	14.6677	14.7523	14.829	14.6913	14.5294	14.3622	14.1799	14.0077	13.8318	13.6568	13.4696	13.8991	13.6889	13.4817	13.283	13.0902	12.9474	14.2066	14.2609	14.3145	14.3675	14.4197	14.4714	14.5224	14.5727	14.6224	14.6715	14.72	14.7678	14.8151	14.8618	14.9079	15.0233	15.2008	15.3726	15.5388	15.698	15.6025	15.5047	15.4045	15.2876	14.7224	14.2917	14.6932	14.7785
Magma Melt Fe2O3 (wt. %)	1.07595	0.967671	0.907387	0.954072	0.931413	0.909255	0.886948	0.880988	0.878737	0.876208	0.789592	0.70843	0.636768	0.571101	0.513154	1.0105	0.933641	0.862091	0.797381	0.738771	0.697089	1.06322	1.06728	1.07129	1.07526	1.07917	1.08303	1.08685	1.09062	1.09434	1.09801	1.10164	1.10522	1.10876	1.11225	1.1157	1.10988	1.09485	1.07959	1.06411	1.04863	1.05903	1.0695	1.08006	1.08652	0.976705	0.873185	0.940772	0.918127
Magma Melt Cr2O3 (wt. %)	0	0	0	0	0	0	0	0	0	0	0	0	0	0	0	0	0	0	0	0	0	0	0	0	0	0	0	0	0	0	0	0	0	0	0	0	0	0	0	0	0	0	0	0	0	0	0	0	0
Magma Melt FeO (wt. %)	5.62089	5.07977	4.73328	4.77812	4.71842	4.6582	4.59496	4.55287	4.49562	4.43173	4.287	4.13658	3.98473	3.84035	3.69551	1.82697	1.75782	1.69412	1.63856	1.5927	1.55339	6.02301	5.9907	5.95804	5.92503	5.89168	5.858	5.82398	5.78963	5.75495	5.71995	5.68463	5.64899	5.61303	5.57676	5.54017	5.52584	5.53145	5.53503	5.53662	5.53656	5.57425	5.60858	5.63963	5.64783	5.08205	4.6852	4.7592	4.69757
Magma Melt MnO (wt. %)	0.151194	0.170319	0.178336	0.156224	0.158606	0.160791	0.162818	0.165378	0.167186	0.168672	0.170224	0.171468	0.172515	0.175746	0.178371	0.18694	0.18779	0.187245	0.185516	0.181854	0.183446	0.141724	0.141141	0.140552	0.139955	0.139352	0.138742	0.138126	0.137503	0.136874	0.136239	0.135597	0.13495	0.134296	0.133636	0.132971	0.133797	0.13604	0.138236	0.140386	0.142494	0.145198	0.147793	0.150277	0.153565	0.172278	0.180181	0.158	0.160317
Magma Melt MgO (wt. %)	3.54535	2.82177	2.39517	3.27391	3.0914	2.91944	2.75469	2.60549	2.45056	2.3012	2.15346	2.00889	1.86801	1.72163	1.58739	1.99736	1.85469	1.71744	1.58881	1.46344	1.39503	6.73788	6.59183	6.44824	6.30708	6.16833	6.03195	5.89793	5.76622	5.63681	5.50965	5.38473	5.26201	5.14147	5.02307	4.90679	4.75432	4.57035	4.3925	4.22056	4.05429	3.88592	3.72373	3.56745	3.39558	2.70051	2.28686	3.13868	2.96238
Magma Melt NiO (wt. %)	0	0	0	0	0	0	0	0	0	0	0	0	0	0	0	0	0	0	0	0	0	0	0	0	0	0	0	0	0	0	0	0	0	0	0	0	0	0	0	0	0	0	0	0	0	0	0	0	0
Magma Melt CoO (wt. %)	0	0	0	0	0	0	0	0	0	0	0	0	0	0	0	0	0	0	0	0	0	0	0	0	0	0	0	0	0	0	0	0	0	0	0	0	0	0	0	0	0	0	0	0	0	0	0	0	0
Magma Melt CaO (wt. %)	7.91337	6.99654	6.42889	7.44876	7.23273	7.02673	6.82544	6.60998	6.41737	6.22914	6.0553	5.82387	5.61258	5.41984	5.24805	5.1688	5.0192	4.8619	4.69902	4.51599	4.45202	8.91071	8.94329	8.97544	9.00718	9.03851	9.06944	9.09996	9.13008	9.15982	9.18917	9.21813	9.24673	9.27495	9.30281	9.33031	9.23953	9.03915	8.84335	8.65208	8.46528	8.28366	8.10908	7.9413	7.7531	6.86777	6.32636	7.30137	7.09103
Na2O	4.81401	4.70186	4.61381	4.47793	4.51173	4.54253	4.56933	4.58104	4.58437	4.57998	4.57415	4.5628	4.54114	4.51309	4.47075	4.57945	4.50404	4.41462	4.31915	4.21163	4.17363	4.09085	4.10649	4.12193	4.13717	4.15223	4.1671	4.18178	4.19627	4.21059	4.22472	4.23868	4.25246	4.26607	4.27952	4.29279	4.33519	4.40448	4.47224	4.53849	4.60334	4.67818	4.75005	4.81903	4.87936	4.7423	4.64479	4.52572	4.55745
K2O	2.57186	3.04514	3.35767	2.98897	3.05641	3.12168	3.1872	3.29223	3.4017	3.51381	3.64389	3.78422	3.92568	4.07538	4.22486	4.5508	4.70029	4.84892	4.98933	5.12136	5.21184	2.08593	2.0939	2.10177	2.10955	2.11723	2.12481	2.13229	2.13968	2.14698	2.15419	2.16131	2.16834	2.17528	2.18213	2.1889	2.2115	2.24878	2.28531	2.32109	2.35635	2.42402	2.49113	2.55772	2.63802	3.11138	3.43106	3.02286	3.08938
P2O5 (wt. %)	1.15937	1.20031	1.21595	1.13107	1.14135	1.1505	1.15832	1.17702	1.19525	1.2116	1.22642	1.19126	1.16149	1.13291	1.10658	1.21631	1.21302	1.20229	1.18585	1.15845	1.16778	0.941706	0.945305	0.948859	0.952369	0.955835	0.959257	0.962637	0.965974	0.969269	0.972523	0.975736	0.978909	0.982042	0.985136	0.988192	0.998395	1.01523	1.03172	1.04787	1.0638	1.09564	1.12729	1.15877	1.19058	1.22785	1.24414	1.1439	1.15366
Sr conc in melt, magma chamber	1240.61	1135.61	1054.97	1123.65	1129.24	1134.22	1138.27	1101.61	1061.11	1020.66	976.69	932.548	889.392	847.023	804.694	919.878	868.696	818.284	771.22	726.448	697.16	1205.16	1209.76	1214.31	1218.8	1223.23	1227.61	1231.93	1236.2	1240.42	1244.58	1248.69	1252.75	1256.76	1260.72	1264.63	1276.18	1294.72	1312.78	1330.37	1347.14	1311.64	1276.92	1242.92	1207.31	1103.42	1022.02	1134.24	1139.29
Zr conc in melt, magma chamber	290.385	377.771	424.49	366.361	373.409	379.982	386.34	397.575	409.059	420.276	432.883	445.102	456.488	467.534	477.177	447.649	453.29	455.746	455.102	449.596	453.978	240.032	240.948	241.853	242.747	243.629	244.501	245.361	246.211	247.05	247.879	248.697	249.505	250.302	251.09	251.868	253.879	257.008	260.051	263.01	265.915	272.945	279.918	286.842	297.32	385.531	433.45	369.31	376.254
Ba conc in melt, magma chamber	827.543	860.037	883.072	829.055	840.231	850.873	861.127	876.024	890.973	905.746	923.16	940.819	958.585	978.085	998.244	1166.54	1198.35	1259.21	1314.73	1365.68	1388.55	687.091	689.716	692.308	694.868	697.396	699.893	702.358	704.792	707.195	709.568	711.912	714.226	716.512	718.769	720.998	728.436	740.707	752.727	764.5	776.07	793.319	810.274	826.954	843.887	874.144	897.572	838.441	849.279
Sr conc in BULK inst solids, magma chamber	487.147	599.504	957.739	182.134	190.896	197.994	205.278	1298.43	1369.45	1647.91	1732.55	1927.98	1957.11	1755.05	1736.93	2137.64	2098.42	2054.55	2024.38	1960.4	1823.94	0.482064	0.483905	0.485724	0.48752	0.489293	0.491045	0.492774	0.494481	0.496167	0.497832	0.499477	0.5011	0.502703	0.504287	0.50585	145.282	176.393	182.847	189.443	226.99	2533.03	2513.83	2494.19	2477.54	2538.45	2476.59	190.13	197.287
Sr conc in BULK cum solids, magma chamber	1038.46	1135.04	1231.37	1115.8	1061.39	1016.14	977.679	1094.8	1202.74	1291.4	1370.36	1433.18	1483.74	1522.55	1556.34	1436.32	1479.56	1515.46	1544.63	1568.13	1586.03	0.482064	0.483844	0.484758	0.48565	0.486526	0.487388	0.488236	0.489072	0.489895	0.490706	0.491505	0.492292	0.493067	0.493832	0.494585	25.2698	57.8447	79.0544	94.3644	109.895	553.197	840.369	1040.61	1185.14	1244.6	1321.48	1068.36	1021.65
Zr conc in BULK inst solids, magma chamber	71.3407	95.545	99.165	103.454	107.793	111.034	114.295	81.9705	81.3341	72.5788	54.3397	47.8651	20.7802	21.5845	22.5627	20.5622	21.3313	21.9871	22.5251	22.7725	23.0766	0.240032	0.240948	0.241853	0.242747	0.243629	0.244501	0.245361	0.246211	0.24705	0.247879	0.248697	0.249505	0.250302	0.25109	0.251868	57.1341	68.2743	69.6629	71.0425	71.8711	31.0798	31.5588	32.0037	32.751	39.599	37.922	106.269	109.61
Zr conc in BULK cum solids, magma chamber	37.0627	41.6633	44.1624	41.0227	44.8707	48.2705	51.3412	51.3478	50.7684	50.2834	49.3397	49.7085	49.7705	49.5156	48.9342	57.8476	56.4187	55.1215	53.9777	52.9561	52.1097	0.240032	0.240917	0.241373	0.241816	0.242252	0.242681	0.243103	0.243519	0.243929	0.244332	0.24473	0.245121	0.245507	0.245888	0.246262	9.98055	22.5459	30.5405	36.1578	40.3398	38.6457	37.6077	36.9292	36.6233	41.5021	43.7108	44.367	47.848
Ba conc in BULK inst solids, magma chamber	28.7955	41.9886	83.184	1.11177	1.23857	1.36781	1.51153	115.248	128.246	165.7	187.553	222.262	243.634	231.114	242.503	316.145	333.107	359.017	386.835	407.994	398.099	0.206127	0.206915	0.207693	0.208461	0.209219	0.209968	0.210707	0.211437	0.212159	0.212871	0.213574	0.214268	0.214954	0.215631	0.216299	0.516559	0.612343	0.660499	0.712347	3.28901	199.802	206.415	213.051	220.33	245.267	257.485	1.20807	1.33596
Ba conc in BULK cum solids, magma chamber	80.0634	89.8801	101.142	94.3667	88.89	84.3052	80.3794	92.4751	104.482	115.111	126.033	138.327	148.989	158.561	167.55	166.313	175.293	183.982	192.65	201.233	209.112	0.206127	0.206888	0.20728	0.207661	0.208035	0.208404	0.208767	0.209124	0.209476	0.209823	0.210165	0.210501	0.210833	0.21116	0.211482	0.263685	0.338839	0.393416	0.437649	0.771544	37.1833	61.9706	80.2632	94.3598	102.01	112.456	89.5916	84.8635
SiO2	55.4122	57.7109	59.1945	57.8243	58.0783	58.3274	58.5833	58.9504	59.34	59.7417	60.3193	60.9898	61.6384	62.2537	62.8582	63.4325	63.9938	64.5787	65.1698	65.8089	66.0865	53.8238	53.8771	53.9298	53.982	54.0338	54.085	54.1357	54.1859	54.2356	54.2849	54.3337	54.382	54.4299	54.4773	54.5243	54.5804	54.6473	54.7154	54.7847	54.8557	55.0196	55.1804	55.3384	55.568	57.8766	59.4406	57.9085	58.1629
K2O	2.57186	3.04514	3.35767	2.98897	3.05641	3.12168	3.1872	3.29223	3.4017	3.51381	3.64389	3.78422	3.92568	4.07538	4.22486	4.5508	4.70029	4.84892	4.98933	5.12136	5.21184	2.08593	2.0939	2.10177	2.10955	2.11723	2.12481	2.13229	2.13968	2.14698	2.15419	2.16131	2.16834	2.17528	2.18213	2.1889	2.2115	2.24878	2.28531	2.32109	2.35635	2.42402	2.49113	2.55772	2.63802	3.11138	3.43106	3.02286	3.08938
SiO2	55.4122	57.7109	59.1945	57.8243	58.0783	58.3274	58.5833	58.9504	59.34	59.7417	60.3193	60.9898	61.6384	62.2537	62.8582	63.4325	63.9938	64.5787	65.1698	65.8089	66.0865	53.8238	53.8771	53.9298	53.982	54.0338	54.085	54.1357	54.1859	54.2356	54.2849	54.3337	54.382	54.4299	54.4773	54.5243	54.5804	54.6473	54.7154	54.7847	54.8557	55.0196	55.1804	55.3384	55.568	57.8766	59.4406	57.9085	58.1629
Sr conc in melt, magma chamber	1240.61	1135.61	1054.97	1123.65	1129.24	1134.22	1138.27	1101.61	1061.11	1020.66	976.69	932.548	889.392	847.023	804.694	919.878	868.696	818.284	771.22	726.448	697.16	1205.16	1209.76	1214.31	1218.8	1223.23	1227.61	1231.93	1236.2	1240.42	1244.58	1248.69	1252.75	1256.76	1260.72	1264.63	1276.18	1294.72	1312.78	1330.37	1347.14	1311.64	1276.92	1242.92	1207.31	1103.42	1022.02	1134.24	1139.29
SiO2	55.4122	57.7109	59.1945	57.8243	58.0783	58.3274	58.5833	58.9504	59.34	59.7417	60.3193	60.9898	61.6384	62.2537	62.8582	63.4325	63.9938	64.5787	65.1698	65.8089	66.0865	53.8238	53.8771	53.9298	53.982	54.0338	54.085	54.1357	54.1859	54.2356	54.2849	54.3337	54.382	54.4299	54.4773	54.5243	54.5804	54.6473	54.7154	54.7847	54.8557	55.0196	55.1804	55.3384	55.568	57.8766	59.4406	57.9085	58.1629
Ba conc in melt, magma chamber	827.543	860.037	883.072	829.055	840.231	850.873	861.127	876.024	890.973	905.746	923.16	940.819	958.585	978.085	998.244	1166.54	1198.35	1259.21	1314.73	1365.68	1388.55	687.091	689.716	692.308	694.868	697.396	699.893	702.358	704.792	707.195	709.568	711.912	714.226	716.512	718.769	720.998	728.436	740.707	752.727	764.5	776.07	793.319	810.274	826.954	843.887	874.144	897.572	838.441	849.279
SiO2	55.4122	57.7109	59.1945	57.8243	58.0783	58.3274	58.5833	58.9504	59.34	59.7417	60.3193	60.9898	61.6384	62.2537	62.8582	63.4325	63.9938	64.5787	65.1698	65.8089	66.0865	53.8238	53.8771	53.9298	53.982	54.0338	54.085	54.1357	54.1859	54.2356	54.2849	54.3337	54.382	54.4299	54.4773	54.5243	54.5804	54.6473	54.7154	54.7847	54.8557	55.0196	55.1804	55.3384	55.568	57.8766	59.4406	57.9085	58.1629
Zr conc in melt, magma chamber	290.385	377.771	424.49	366.361	373.409	379.982	386.34	397.575	409.059	420.276	432.883	445.102	456.488	467.534	477.177	447.649	453.29	455.746	455.102	449.596	453.978	240.032	240.948	241.853	242.747	243.629	244.501	245.361	246.211	247.05	247.879	248.697	249.505	250.302	251.09	251.868	253.879	257.008	260.051	263.01	265.915	272.945	279.918	286.842	297.32	385.531	433.45	369.31	376.254
SiO2	55.4122	57.7109	59.1945	57.8243	58.0783	58.3274	58.5833	58.9504	59.34	59.7417	60.3193	60.9898	61.6384	62.2537	62.8582	63.4325	63.9938	64.5787	65.1698	65.8089	66.0865	53.8238	53.8771	53.9298	53.982	54.0338	54.085	54.1357	54.1859	54.2356	54.2849	54.3337	54.382	54.4299	54.4773	54.5243	54.5804	54.6473	54.7154	54.7847	54.8557	55.0196	55.1804	55.3384	55.568	57.8766	59.4406	57.9085	58.1629
K2O	2.57186	3.04514	3.35767	2.98897	3.05641	3.12168	3.1872	3.29223	3.4017	3.51381	3.64389	3.78422	3.92568	4.07538	4.22486	4.5508	4.70029	4.84892	4.98933	5.12136	5.21184	2.08593	2.0939	2.10177	2.10955	2.11723	2.12481	2.13229	2.13968	2.14698	2.15419	2.16131	2.16834	2.17528	2.18213	2.1889	2.2115	2.24878	2.28531	2.32109	2.35635	2.42402	2.49113	2.55772	2.63802	3.11138	3.43106	3.02286	3.08938
SiO2	55.4122	57.7109	59.1945	57.8243	58.0783	58.3274	58.5833	58.9504	59.34	59.7417	60.3193	60.9898	61.6384	62.2537	62.8582	63.4325	63.9938	64.5787	65.1698	65.8089	66.0865	53.8238	53.8771	53.9298	53.982	54.0338	54.085	54.1357	54.1859	54.2356	54.2849	54.3337	54.382	54.4299	54.4773	54.5243	54.5804	54.6473	54.7154	54.7847	54.8557	55.0196	55.1804	55.3384	55.568	57.8766	59.4406	57.9085	58.1629
Na2O+Na2O	9.62803	9.40372	9.22761	8.95586	9.02345	9.08505	9.13866	9.16209	9.16873	9.15997	9.1483	9.12561	9.08229	9.02617	8.9415	9.15891	9.00808	8.82923	8.6383	8.42326	8.34727	8.1817	8.21297	8.24385	8.27434	8.30446	8.33419	8.36355	8.39254	8.42117	8.44944	8.47736	8.50493	8.53215	8.55903	8.58558	8.67038	8.80896	8.94448	9.07698	9.20669	9.35636	9.5001	9.63807	9.75872	9.48459	9.28958	9.05145	9.1149
SiO2	55.4122	57.7109	59.1945	57.8243	58.0783	58.3274	58.5833	58.9504	59.34	59.7417	60.3193	60.9898	61.6384	62.2537	62.8582	63.4325	63.9938	64.5787	65.1698	65.8089	66.0865	53.8238	53.8771	53.9298	53.982	54.0338	54.085	54.1357	54.1859	54.2356	54.2849	54.3337	54.382	54.4299	54.4773	54.5243	54.5804	54.6473	54.7154	54.7847	54.8557	55.0196	55.1804	55.3384	55.568	57.8766	59.4406	57.9085	58.1629
Sr conc in melt, magma chamber	1240.61	1135.61	1054.97	1123.65	1129.24	1134.22	1138.27	1101.61	1061.11	1020.66	976.69	932.548	889.392	847.023	804.694	919.878	868.696	818.284	771.22	726.448	697.16	1205.16	1209.76	1214.31	1218.8	1223.23	1227.61	1231.93	1236.2	1240.42	1244.58	1248.69	1252.75	1256.76	1260.72	1264.63	1276.18	1294.72	1312.78	1330.37	1347.14	1311.64	1276.92	1242.92	1207.31	1103.42	1022.02	1134.24	1139.29
Wang, C., Liu, L., Yang, W.-Q., Cao, Y.-T., and Smithies, R.H., 2022, Mafic magma driven magmatic processes and compositional variation in granitic pluton construction: The Buya intrusion of West Kunlun, Northwestern China: Geosphere, v. 18, https://doi.org/10.1130/GES02451.1
[truncated: 18 more columns]

## Sheet: Sheet1
T	Magma Chamber Process	SiO2	Magma Melt TiO2 (wt. %)	Magma Melt Al2O3 (wt. %)	Magma Melt Fe2O3 (wt. %)	Magma Melt Cr2O3 (wt. %)	Magma Melt FeO (wt. %)	Magma Melt MnO (wt. %)	Magma Melt MgO (wt. %)	Magma Melt NiO (wt. %)	Magma Melt CoO (wt. %)	Magma Melt CaO (wt. %)	Na2O	K2O	Magma Melt P2O5 (wt. %)	> Elements + Isotopes >	Sr conc in melt, magma chamber	Zr conc in melt, magma chamber	Ba conc in melt, magma chamber	Sr conc in BULK inst solids, magma chamber	Sr conc in BULK cum solids, magma chamber	Zr conc in BULK inst solids, magma chamber	Zr conc in BULK cum solids, magma chamber	Ba conc in BULK inst solids, magma chamber	Ba conc in BULK cum solids, magma chamber
1085	AFC	55.4122	1.10662	15.3903	1.07595	0	5.62089	0.151194	3.54535	0	0	7.91337	4.81401	2.57186	1.15937		1240.61	290.385	827.543	487.147	1038.46	71.3407	37.0627	28.7955	80.0634
1058.92	AFC	57.7109	1.04702	14.8362	0.967671	0	5.07977	0.170319	2.82177	0	0	6.99654	4.70186	3.04514	1.20031		1135.61	377.771	860.037	599.504	1135.04	95.545	41.6633	41.9886	89.8801
1040.13	AFC	59.1945	1.01577	14.4166	0.907387	0	4.73328	0.178336	2.39517	0	0	6.42889	4.61381	3.35767	1.21595		1054.97	424.49	883.072	957.739	1231.37	99.165	44.1624	83.184	101.142
1075.92	AFC	57.8243	1.00608	14.5767	0.954072	0	4.77812	0.156224	3.27391	0	0	7.44876	4.47793	2.98897	1.13107		1123.65	366.361	829.055	182.134	1115.8	103.454	41.0227	1.11177	94.3667
1069.15	AFC	58.0783	1.0026	14.6677	0.931413	0	4.71842	0.158606	3.0914	0	0	7.23273	4.51173	3.05641	1.14135		1129.24	373.409	840.231	190.896	1061.39	107.793	44.8707	1.23857	88.89
1062.49	AFC	58.3274	0.998743	14.7523	0.909255	0	4.6582	0.160791	2.91944	0	0	7.02673	4.54253	3.12168	1.1505		1134.22	379.982	850.873	197.994	1016.14	111.034	48.2705	1.36781	84.3052
1055.82	AFC	58.5833	0.99419	14.829	0.886948	0	4.59496	0.162818	2.75469	0	0	6.82544	4.56933	3.1872	1.15832		1138.27	386.34	861.127	205.278	977.679	114.295	51.3412	1.51153	80.3794
1048.92	AFC	58.9504	1.00294	14.6913	0.880988	0	4.55287	0.165378	2.60549	0	0	6.60998	4.58104	3.29223	1.17702		1101.61	397.575	876.024	1298.43	1094.8	81.9705	51.3478	115.248	92.4751
1042.08	AFC	59.34	1.01379	14.5294	0.878737	0	4.49562	0.167186	2.45056	0	0	6.41737	4.58437	3.4017	1.19525		1061.11	409.059	890.973	1369.45	1202.74	81.3341	50.7684	128.246	104.482
1035.19	AFC	59.7417	1.02454	14.3622	0.876208	0	4.43173	0.168672	2.3012	0	0	6.22914	4.57998	3.51381	1.2116		1020.66	420.276	905.746	1647.91	1291.4	72.5788	50.2834	165.7	115.111
1028.34	AFC	60.3193	1.00536	14.1799	0.789592	0	4.287	0.170224	2.15346	0	0	6.0553	4.57415	3.64389	1.22642		976.69	432.883	923.16	1732.55	1370.36	54.3397	49.3397	187.553	126.033
1021.43	AFC	60.9898	0.987076	14.0077	0.70843	0	4.13658	0.171468	2.00889	0	0	5.82387	4.5628	3.78422	1.19126		932.548	445.102	940.819	1927.98	1433.18	47.8651	49.7085	222.262	138.327
1014.65	AFC	61.6384	0.971041	13.8318	0.636768	0	3.98473	0.172515	1.86801	0	0	5.61258	4.54114	3.92568	1.16149		889.392	456.488	958.585	1957.11	1483.74	20.7802	49.7705	243.634	148.989
1007.98	AFC	62.2537	0.958178	13.6568	0.571101	0	3.84035	0.175746	1.72163	0	0	5.41984	4.51309	4.07538	1.13291		847.023	467.534	978.085	1755.05	1522.55	21.5845	49.5156	231.114	158.561
1001.38	AFC	62.8582	0.947474	13.4696	0.513154	0	3.69551	0.178371	1.58739	0	0	5.24805	4.47075	4.22486	1.10658		804.694	477.177	998.244	1736.93	1556.34	22.5627	48.9342	242.503	167.55
1019.8	AFC	63.4325	0.780868	13.8991	1.0105	0	1.82697	0.18694	1.99736	0	0	5.1688	4.57945	4.5508	1.21631		919.878	447.649	1166.54	2137.64	1436.32	20.5622	57.8476	316.145	166.313
1012.96	AFC	63.9938	0.791865	13.6889	0.933641	0	1.75782	0.18779	1.85469	0	0	5.0192	4.50404	4.70029	1.21302		868.696	453.29	1198.35	2098.42	1479.56	21.3313	56.4187	333.107	175.293
1006.27	AFC	64.5787	0.801215	13.4817	0.862091	0	1.69412	0.187245	1.71744	0	0	4.8619	4.41462	4.84892	1.20229		818.284	455.746	1259.21	2054.55	1515.46	21.9871	55.1215	359.017	183.982
999.839	AFC	65.1698	0.807226	13.283	0.797381	0	1.63856	0.185516	1.58881	0	0	4.69902	4.31915	4.98933	1.18585		771.22	455.102	1314.73	2024.38	1544.63	22.5251	53.9777	386.835	192.65
993.706	AFC	65.8089	0.807375	13.0902	0.738771	0	1.5927	0.181854	1.46344	0	0	4.51599	4.21163	5.12136	1.15845		726.448	449.596	1365.68	1960.4	1568.13	22.7725	52.9561	407.994	201.233
988.627	AFC	66.0865	0.8113	12.9474	0.697089	0	1.55339	0.183446	1.39503	0	0	4.45202	4.17363	5.21184	1.16778		697.16	453.978	1388.55	1823.94	1586.03	23.0766	52.1097	398.099	209.112
1195.7	FC	53.8238	0.972083	14.2066	1.06322	0	6.02301	0.141724	6.73788	0	0	8.91071	4.09085	2.08593	0.941706		1205.16	240.032	687.091	0.482064	0.482064	0.240032	0.240032	0.206127	0.206127
1190.7	FC	53.8771	0.975799	14.2609	1.06728	0	5.9907	0.141141	6.59183	0	0	8.94329	4.10649	2.0939	0.945305		1209.76	240.948	689.716	0.483905	0.483844	0.240948	0.240917	0.206915	0.206888
1185.7	FC	53.9298	0.979467	14.3145	1.07129	0	5.95804	0.140552	6.44824	0	0	8.97544	4.12193	2.10177	0.948859		1214.31	241.853	692.308	0.485724	0.484758	0.241853	0.241373	0.207693	0.20728
1180.7	FC	53.982	0.98309	14.3675	1.07526	0	5.92503	0.139955	6.30708	0	0	9.00718	4.13717	2.10955	0.952369		1218.8	242.747	694.868	0.48752	0.48565	0.242747	0.241816	0.208461	0.207661
1175.7	FC	54.0338	0.986668	14.4197	1.07917	0	5.89168	0.139352	6.16833	0	0	9.03851	4.15223	2.11723	0.955835		1223.23	243.629	697.396	0.489293	0.486526	0.243629	0.242252	0.209219	0.208035
1170.7	FC	54.085	0.990201	14.4714	1.08303	0	5.858	0.138742	6.03195	0	0	9.06944	4.1671	2.12481	0.959257		1227.61	244.501	699.893	0.491045	0.487388	0.244501	0.242681	0.209968	0.208404
1165.7	FC	54.1357	0.993689	14.5224	1.08685	0	5.82398	0.138126	5.89793	0	0	9.09996	4.18178	2.13229	0.962637		1231.93	245.361	702.358	0.492774	0.488236	0.245361	0.243103	0.210707	0.208767
1160.7	FC	54.1859	0.997134	14.5727	1.09062	0	5.78963	0.137503	5.76622	0	0	9.13008	4.19627	2.13968	0.965974		1236.2	246.211	704.792	0.494481	0.489072	0.246211	0.243519	0.211437	0.209124
1155.7	FC	54.2356	1.00054	14.6224	1.09434	0	5.75495	0.136874	5.63681	0	0	9.15982	4.21059	2.14698	0.969269		1240.42	247.05	707.195	0.496167	0.489895	0.24705	0.243929	0.212159	0.209476
1150.7	FC	54.2849	1.00389	14.6715	1.09801	0	5.71995	0.136239	5.50965	0	0	9.18917	4.22472	2.15419	0.972523		1244.58	247.879	709.568	0.497832	0.490706	0.247879	0.244332	0.212871	0.209823
1145.7	FC	54.3337	1.00721	14.72	1.10164	0	5.68463	0.135597	5.38473	0	0	9.21813	4.23868	2.16131	0.975736		1248.69	248.697	711.912	0.499477	0.491505	0.248697	0.24473	0.213574	0.210165
1140.7	FC	54.382	1.01049	14.7678	1.10522	0	5.64899	0.13495	5.26201	0	0	9.24673	4.25246	2.16834	0.978909		1252.75	249.505	714.226	0.5011	0.492292	0.249505	0.245121	0.214268	0.210501
1135.7	FC	54.4299	1.01372	14.8151	1.10876	0	5.61303	0.134296	5.14147	0	0	9.27495	4.26607	2.17528	0.982042		1256.76	250.302	716.512	0.502703	0.493067	0.250302	0.245507	0.214954	0.210833
1130.7	FC	54.4773	1.01691	14.8618	1.11225	0	5.57676	0.133636	5.02307	0	0	9.30281	4.27952	2.18213	0.985136		1260.72	251.09	718.769	0.504287	0.493832	0.25109	0.245888	0.215631	0.21116
1125.7	FC	54.5243	1.02007	14.9079	1.1157	0	5.54017	0.132971	4.90679	0	0	9.33031	4.29279	2.1889	0.988192		1264.63	251.868	720.998	0.50585	0.494585	0.251868	0.246262	0.216299	0.211482
1120.7	FC	54.5804	1.02501	15.0233	1.10988	0	5.52584	0.133797	4.75432	0	0	9.23953	4.33519	2.2115	0.998395		1276.18	253.879	728.436	145.282	25.2698	57.1341	9.98055	0.516559	0.263685
1115.7	FC	54.6473	1.03084	15.2008	1.09485	0	5.53145	0.13604	4.57035	0	0	9.03915	4.40448	2.24878	1.01523		1294.72	257.008	740.707	176.393	57.8447	68.2743	22.5459	0.612343	0.338839
1110.7	FC	54.7154	1.03578	15.3726	1.07959	0	5.53503	0.138236	4.3925	0	0	8.84335	4.47224	2.28531	1.03172		1312.78	260.051	752.727	182.847	79.0544	69.6629	30.5405	0.660499	0.393416
1105.7	FC	54.7847	1.03984	15.5388	1.06411	0	5.53662	0.140386	4.22056	0	0	8.65208	4.53849	2.32109	1.04787		1330.37	263.01	764.5	189.443	94.3644	71.0425	36.1578	0.712347	0.437649
1100.7	FC	54.8557	1.04314	15.698	1.04863	0	5.53656	0.142494	4.05429	0	0	8.46528	4.60334	2.35635	1.0638		1347.14	265.915	776.07	226.99	109.895	71.8711	40.3398	3.28901	0.771544
1095.7	FC	55.0196	1.06567	15.6025	1.05903	0	5.57425	0.145198	3.88592	0	0	8.28366	4.67818	2.42402	1.09564		1311.64	272.945	793.319	2533.03	553.197	31.0798	38.6457	199.802	37.1833
1090.7	FC	55.1804	1.08772	15.5047	1.0695	0	5.60858	0.147793	3.72373	0	0	8.10908	4.75005	2.49113	1.12729		1276.92	279.918	810.274	2513.83	840.369	31.5588	37.6077	206.415	61.9706
1085.7	FC	55.3384	1.10932	15.4045	1.08006	0	5.63963	0.150277	3.56745	0	0	7.9413	4.81903	2.55772	1.15877		1242.92	286.842	826.954	2494.19	1040.61	32.0037	36.9292	213.051	80.2632
1080	FC	55.568	1.12768	15.2876	1.08652	0	5.64783	0.153565	3.39558	0	0	7.7531	4.87936	2.63802	1.19058		1207.31	297.32	843.887	2477.54	1185.14	32.751	36.6233	220.33	94.3598
1053.92	FC	57.8766	1.06506	14.7224	0.976705	0	5.08205	0.172278	2.70051	0	0	6.86777	4.7423	3.11138	1.22785		1103.42	385.531	874.144	2538.45	1244.6	39.599	41.5021	245.267	102.01
1035.13	FC	59.4406	1.01751	14.2917	0.873185	0	4.6852	0.180181	2.28686	0	0	6.32636	4.64479	3.43106	1.24414		1022.02	433.45	897.572	2476.59	1321.48	37.922	43.7108	257.485	112.456
1070.92	FC	57.9085	1.00826	14.6932	0.940772	0	4.7592	0.158	3.13868	0	0	7.30137	4.52572	3.02286	1.1439		1134.24	369.31	838.441	190.13	1068.36	106.269	44.367	1.20807	89.5916
1064.15	FC	58.1629	1.00413	14.7785	0.918127	0	4.69757	0.160317	2.96238	0	0	7.09103	4.55745	3.08938	1.15366		1139.29	376.254	849.279	197.287	1021.65	109.61	47.848	1.33596	84.8635
1057.49	FC	58.4121	0.999671	14.8578	0.895976	0	4.63576	0.162443	2.79653	0	0	6.8902	4.5863	3.15375	1.16232		1143.77	382.727	859.601	204.587	982.387	112.875	50.9575	1.47583	80.8602
1050.82	FC	58.7387	1.00878	14.7362	0.890808	0	4.60202	0.165113	2.65242	0	0	6.68414	4.60447	3.25061	1.18256		1110.13	393.414	874.22	2482.9	1093.24	48.3834	51.1141	235.664	92.3013
1043.92	FC	59.1215	1.01974	14.5754	0.888835	0	4.54659	0.167107	2.49497	0	0	6.49078	4.61108	3.35925	1.20237		1069.74	405.264	889.353	2580.82	1201.7	40.6321	50.5769	257.311	104.333
1037.08	FC	59.5092	1.03035	14.4119	0.886645	0	4.48557	0.168774	2.34556	0	0	6.30504	4.61027	3.4686	1.22019		1030.06	416.74	904.033	2549.19	1289.15	41.0212	50.1429	265.132	114.792
1030.19	FC	60.0549	1.01479	14.2333	0.809833	0	4.35287	0.17055	2.19611	0	0	6.13006	4.60973	3.59478	1.23588		986.713	429.676	921.339	2407.81	1368.18	36.1253	49.3096	268.537	125.663
1023.34	FC	60.7063	0.995851	14.0658	0.727131	0	4.20547	0.172103	2.05126	0	0	5.90343	4.60516	3.73107	1.20285		943.418	442.48	938.831	2286.29	1430.41	55.1231	49.7189	306.369	137.857
1016.43	FC	61.3545	0.977561	13.8897	0.652168	0	4.0552	0.173176	1.91465	0	0	5.68658	4.58712	3.86993	1.17416		900.573	454.549	955.987	2256.9	1480.87	53.8084	49.9459	312.595	148.416
1009.65	FC	61.9559	0.962651	13.7102	0.584035	0	3.91633	0.176738	1.77593	0	0	5.49798	4.56287	4.01559	1.14716		858.181	466.474	974.338	2164.46	1521	48.5176	49.7019	315.042	158.077
1002.98	FC	62.5521	0.950413	13.52	0.524234	0	3.77102	0.179851	1.63908	0	0	5.33128	4.52596	4.16386	1.12323		815.678	477.5	993.162	2189.04	1555.27	40.8608	49.0907	332.599	167.105
996.381	FC	63.1375	0.939704	13.3304	0.470785	0	3.6267	0.182315	1.51174	0	0	5.17256	4.47749	4.31126	1.10308		774.987	486.885	1012.81	2148.31	1582.44	38.1058	48.4568	339.302	175.122
1014.8	FC	63.6484	0.787224	13.7508	0.959514	0	1.78077	0.190897	1.92061	0	0	5.12417	4.57819	4.63842	1.24205		885.677	456.627	1182.97	2535.54	1476.47	23.5354	56.5943	390.532	174.503
1007.96	FC	64.2029	0.798183	13.5405	0.886235	0	1.71212	0.191605	1.78391	0	0	4.98076	4.49712	4.78655	1.23766		836.299	462.037	1214.42	2463.4	1512.93	22.7463	55.2767	407.325	183.162
1001.27	FC	64.7822	0.807355	13.3364	0.817909	0	1.64921	0.190892	1.65182	0	0	4.8259	4.40284	4.93367	1.2257		788.059	464.168	1275.34	2370.06	1542.57	23.3198	54.1126	430.936	191.816
994.839	FC	65.3683	0.813175	13.141	0.756137	0	1.59449	0.188987	1.52793	0	0	4.66537	4.30281	5.07244	1.20803		743	463.172	1330.85	2279.59	1566.62	23.7333	53.0728	452.826	200.434
988.706	FC	66.0033	0.813105	12.9516	0.700204	0	1.54947	0.185128	1.40703	0	0	4.48454	4.19075	5.20268	1.1793		700.098	457.26	1381.75	2190.09	1585.91	23.883	52.1253	473.37	209.01
983.627	FC	66.2755	0.81683	12.8111	0.660473	0	1.51083	0.186654	1.34131	0	0	4.42258	4.15096	5.29182	1.18821		672.077	461.489	1404.39	2131.34	1600.65	24.4775	51.3688	482.637	216.445
1081.01	RFC	57.3342	1.02266	14.6484	0.981327	0	4.89671	0.154184	3.41799	0	0	7.64996	4.51516	2.89205	1.13658		1137.67	353.842	823.619	23.4724	1139.87	12.9992	39.4137	0.34813	96.77
1021.31	RFC	63.1786	0.778108	13.95	1.03159	0	1.84749	0.188653	2.04904	0	0	5.24286	4.63119	4.50391	1.23508		932.544	448.44	1162.83	1068.06	1433.38	81.4019	58.0038	142.556	165.685

## Sheet: Sheet5
T	1195.7	1190.7	1185.7	1180.7	1175.7	1170.7	1165.7	1160.7	1155.7	1150.7	1145.7	1140.7	1135.7	1130.7	1125.7	1120.7	1115.7	1110.7	1105.7	1100.7	1095.7	1090.7	1085.7	1085	1080	1058.92	1053.92	1040.13	1035.13	1081.01	1075.92	1070.92	1069.15	1064.15	1062.49	1057.49	1055.82	1050.82	1048.92	1043.92	1042.08	1037.08	1035.19	1030.19	1028.34	1023.34	1021.43	1016.43	1014.65
Magma Chamber Process	FC	FC	FC	FC	FC	FC	FC	FC	FC	FC	FC	FC	FC	FC	FC	FC	FC	FC	FC	FC	FC	FC	FC	AFC	FC	AFC	FC	AFC	FC	RFC	AFC	FC	AFC	FC	AFC	FC	AFC	FC	AFC	FC	AFC	FC	AFC	FC	AFC	FC	AFC	FC	AFC
SiO2	53.8238	53.8771	53.9298	53.982	54.0338	54.085	54.1357	54.1859	54.2356	54.2849	54.3337	54.382	54.4299	54.4773	54.5243	54.5804	54.6473	54.7154	54.7847	54.8557	55.0196	55.1804	55.3384	55.4122	55.568	57.7109	57.8766	59.1945	59.4406	57.3342	57.8243	57.9085	58.0783	58.1629	58.3274	58.4121	58.5833	58.7387	58.9504	59.1215	59.34	59.5092	59.7417	60.0549	60.3193	60.7063	60.9898	61.3545	61.6384
Magma Melt TiO2 (wt. %)	0.972083	0.975799	0.979467	0.98309	0.986668	0.990201	0.993689	0.997134	1.00054	1.00389	1.00721	1.01049	1.01372	1.01691	1.02007	1.02501	1.03084	1.03578	1.03984	1.04314	1.06567	1.08772	1.10932	1.10662	1.12768	1.04702	1.06506	1.01577	1.01751	1.02266	1.00608	1.00826	1.0026	1.00413	0.998743	0.999671	0.99419	1.00878	1.00294	1.01974	1.01379	1.03035	1.02454	1.01479	1.00536	0.995851	0.987076	0.977561	0.971041
Magma Melt Al2O3 (wt. %)	14.2066	14.2609	14.3145	14.3675	14.4197	14.4714	14.5224	14.5727	14.6224	14.6715	14.72	14.7678	14.8151	14.8618	14.9079	15.0233	15.2008	15.3726	15.5388	15.698	15.6025	15.5047	15.4045	15.3903	15.2876	14.8362	14.7224	14.4166	14.2917	14.6484	14.5767	14.6932	14.6677	14.7785	14.7523	14.8578	14.829	14.7362	14.6913	14.5754	14.5294	14.4119	14.3622	14.2333	14.1799	14.0658	14.0077	13.8897	13.8318
Magma Melt Fe2O3 (wt. %)	1.06322	1.06728	1.07129	1.07526	1.07917	1.08303	1.08685	1.09062	1.09434	1.09801	1.10164	1.10522	1.10876	1.11225	1.1157	1.10988	1.09485	1.07959	1.06411	1.04863	1.05903	1.0695	1.08006	1.07595	1.08652	0.967671	0.976705	0.907387	0.873185	0.981327	0.954072	0.940772	0.931413	0.918127	0.909255	0.895976	0.886948	0.890808	0.880988	0.888835	0.878737	0.886645	0.876208	0.809833	0.789592	0.727131	0.70843	0.652168	0.636768
Magma Melt Cr2O3 (wt. %)	0	0	0	0	0	0	0	0	0	0	0	0	0	0	0	0	0	0	0	0	0	0	0	0	0	0	0	0	0	0	0	0	0	0	0	0	0	0	0	0	0	0	0	0	0	0	0	0	0
Magma Melt FeO (wt. %)	6.02301	5.9907	5.95804	5.92503	5.89168	5.858	5.82398	5.78963	5.75495	5.71995	5.68463	5.64899	5.61303	5.57676	5.54017	5.52584	5.53145	5.53503	5.53662	5.53656	5.57425	5.60858	5.63963	5.62089	5.64783	5.07977	5.08205	4.73328	4.6852	4.89671	4.77812	4.7592	4.71842	4.69757	4.6582	4.63576	4.59496	4.60202	4.55287	4.54659	4.49562	4.48557	4.43173	4.35287	4.287	4.20547	4.13658	4.0552	3.98473
Magma Melt MnO (wt. %)	0.141724	0.141141	0.140552	0.139955	0.139352	0.138742	0.138126	0.137503	0.136874	0.136239	0.135597	0.13495	0.134296	0.133636	0.132971	0.133797	0.13604	0.138236	0.140386	0.142494	0.145198	0.147793	0.150277	0.151194	0.153565	0.170319	0.172278	0.178336	0.180181	0.154184	0.156224	0.158	0.158606	0.160317	0.160791	0.162443	0.162818	0.165113	0.165378	0.167107	0.167186	0.168774	0.168672	0.17055	0.170224	0.172103	0.171468	0.173176	0.172515
Magma Melt MgO (wt. %)	6.73788	6.59183	6.44824	6.30708	6.16833	6.03195	5.89793	5.76622	5.63681	5.50965	5.38473	5.26201	5.14147	5.02307	4.90679	4.75432	4.57035	4.3925	4.22056	4.05429	3.88592	3.72373	3.56745	3.54535	3.39558	2.82177	2.70051	2.39517	2.28686	3.41799	3.27391	3.13868	3.0914	2.96238	2.91944	2.79653	2.75469	2.65242	2.60549	2.49497	2.45056	2.34556	2.3012	2.19611	2.15346	2.05126	2.00889	1.91465	1.86801
Magma Melt NiO (wt. %)	0	0	0	0	0	0	0	0	0	0	0	0	0	0	0	0	0	0	0	0	0	0	0	0	0	0	0	0	0	0	0	0	0	0	0	0	0	0	0	0	0	0	0	0	0	0	0	0	0
Magma Melt CoO (wt. %)	0	0	0	0	0	0	0	0	0	0	0	0	0	0	0	0	0	0	0	0	0	0	0	0	0	0	0	0	0	0	0	0	0	0	0	0	0	0	0	0	0	0	0	0	0	0	0	0	0
Magma Melt CaO (wt. %)	8.91071	8.94329	8.97544	9.00718	9.03851	9.06944	9.09996	9.13008	9.15982	9.18917	9.21813	9.24673	9.27495	9.30281	9.33031	9.23953	9.03915	8.84335	8.65208	8.46528	8.28366	8.10908	7.9413	7.91337	7.7531	6.99654	6.86777	6.42889	6.32636	7.64996	7.44876	7.30137	7.23273	7.09103	7.02673	6.8902	6.82544	6.68414	6.60998	6.49078	6.41737	6.30504	6.22914	6.13006	6.0553	5.90343	5.82387	5.68658	5.61258
Na2O	4.09085	4.10649	4.12193	4.13717	4.15223	4.1671	4.18178	4.19627	4.21059	4.22472	4.23868	4.25246	4.26607	4.27952	4.29279	4.33519	4.40448	4.47224	4.53849	4.60334	4.67818	4.75005	4.81903	4.81401	4.87936	4.70186	4.7423	4.61381	4.64479	4.51516	4.47793	4.52572	4.51173	4.55745	4.54253	4.5863	4.56933	4.60447	4.58104	4.61108	4.58437	4.61027	4.57998	4.60973	4.57415	4.60516	4.5628	4.58712	4.54114
K2O	2.08593	2.0939	2.10177	2.10955	2.11723	2.12481	2.13229	2.13968	2.14698	2.15419	2.16131	2.16834	2.17528	2.18213	2.1889	2.2115	2.24878	2.28531	2.32109	2.35635	2.42402	2.49113	2.55772	2.57186	2.63802	3.04514	3.11138	3.35767	3.43106	2.89205	2.98897	3.02286	3.05641	3.08938	3.12168	3.15375	3.1872	3.25061	3.29223	3.35925	3.4017	3.4686	3.51381	3.59478	3.64389	3.73107	3.78422	3.86993	3.92568
Magma Melt P2O5 (wt. %)	0.941706	0.945305	0.948859	0.952369	0.955835	0.959257	0.962637	0.965974	0.969269	0.972523	0.975736	0.978909	0.982042	0.985136	0.988192	0.998395	1.01523	1.03172	1.04787	1.0638	1.09564	1.12729	1.15877	1.15937	1.19058	1.20031	1.22785	1.21595	1.24414	1.13658	1.13107	1.1439	1.14135	1.15366	1.1505	1.16232	1.15832	1.18256	1.17702	1.20237	1.19525	1.22019	1.2116	1.23588	1.22642	1.20285	1.19126	1.17416	1.16149
> Elements + Isotopes >
Sr conc in melt, magma chamber	1205.16	1209.76	1214.31	1218.8	1223.23	1227.61	1231.93	1236.2	1240.42	1244.58	1248.69	1252.75	1256.76	1260.72	1264.63	1276.18	1294.72	1312.78	1330.37	1347.14	1311.64	1276.92	1242.92	1240.61	1207.31	1135.61	1103.42	1054.97	1022.02	1137.67	1123.65	1134.24	1129.24	1139.29	1134.22	1143.77	1138.27	1110.13	1101.61	1069.74	1061.11	1030.06	1020.66	986.713	976.69	943.418	932.548	900.573	889.392
Zr conc in melt, magma chamber	240.032	240.948	241.853	242.747	243.629	244.501	245.361	246.211	247.05	247.879	248.697	249.505	250.302	251.09	251.868	253.879	257.008	260.051	263.01	265.915	272.945	279.918	286.842	290.385	297.32	377.771	385.531	424.49	433.45	353.842	366.361	369.31	373.409	376.254	379.982	382.727	386.34	393.414	397.575	405.264	409.059	416.74	420.276	429.676	432.883	442.48	445.102	454.549	456.488
Ba conc in melt, magma chamber	687.091	689.716	692.308	694.868	697.396	699.893	702.358	704.792	707.195	709.568	711.912	714.226	716.512	718.769	720.998	728.436	740.707	752.727	764.5	776.07	793.319	810.274	826.954	827.543	843.887	860.037	874.144	883.072	897.572	823.619	829.055	838.441	840.231	849.279	850.873	859.601	861.127	874.22	876.024	889.353	890.973	904.033	905.746	921.339	923.16	938.831	940.819	955.987	958.585
Sr conc in BULK inst solids, magma chamber	0.482064	0.483905	0.485724	0.48752	0.489293	0.491045	0.492774	0.494481	0.496167	0.497832	0.499477	0.5011	0.502703	0.504287	0.50585	145.282	176.393	182.847	189.443	226.99	2533.03	2513.83	2494.19	487.147	2477.54	599.504	2538.45	957.739	2476.59	23.4724	182.134	190.13	190.896	197.287	197.994	204.587	205.278	2482.9	1298.43	2580.82	1369.45	2549.19	1647.91	2407.81	1732.55	2286.29	1927.98	2256.9	1957.11
Sr conc in BULK cum solids, magma chamber	0.482064	0.483844	0.484758	0.48565	0.486526	0.487388	0.488236	0.489072	0.489895	0.490706	0.491505	0.492292	0.493067	0.493832	0.494585	25.2698	57.8447	79.0544	94.3644	109.895	553.197	840.369	1040.61	1038.46	1185.14	1135.04	1244.6	1231.37	1321.48	1139.87	1115.8	1068.36	1061.39	1021.65	1016.14	982.387	977.679	1093.24	1094.8	1201.7	1202.74	1289.15	1291.4	1368.18	1370.36	1430.41	1433.18	1480.87	1483.74
Zr conc in BULK inst solids, magma chamber	0.240032	0.240948	0.241853	0.242747	0.243629	0.244501	0.245361	0.246211	0.24705	0.247879	0.248697	0.249505	0.250302	0.25109	0.251868	57.1341	68.2743	69.6629	71.0425	71.8711	31.0798	31.5588	32.0037	71.3407	32.751	95.545	39.599	99.165	37.922	12.9992	103.454	106.269	107.793	109.61	111.034	112.875	114.295	48.3834	81.9705	40.6321	81.3341	41.0212	72.5788	36.1253	54.3397	55.1231	47.8651	53.8084	20.7802
Zr conc in BULK cum solids, magma chamber	0.240032	0.240917	0.241373	0.241816	0.242252	0.242681	0.243103	0.243519	0.243929	0.244332	0.24473	0.245121	0.245507	0.245888	0.246262	9.98055	22.5459	30.5405	36.1578	40.3398	38.6457	37.6077	36.9292	37.0627	36.6233	41.6633	41.5021	44.1624	43.7108	39.4137	41.0227	44.367	44.8707	47.848	48.2705	50.9575	51.3412	51.1141	51.3478	50.5769	50.7684	50.1429	50.2834	49.3096	49.3397	49.7189	49.7085	49.9459	49.7705
Ba conc in BULK inst solids, magma chamber	0.206127	0.206915	0.207693	0.208461	0.209219	0.209968	0.210707	0.211437	0.212159	0.212871	0.213574	0.214268	0.214954	0.215631	0.216299	0.516559	0.612343	0.660499	0.712347	3.28901	199.802	206.415	213.051	28.7955	220.33	41.9886	245.267	83.184	257.485	0.34813	1.11177	1.20807	1.23857	1.33596	1.36781	1.47583	1.51153	235.664	115.248	257.311	128.246	265.132	165.7	268.537	187.553	306.369	222.262	312.595	243.634
Ba conc in BULK cum solids, magma chamber	0.206127	0.206888	0.20728	0.207661	0.208035	0.208404	0.208767	0.209124	0.209476	0.209823	0.210165	0.210501	0.210833	0.21116	0.211482	0.263685	0.338839	0.393416	0.437649	0.771544	37.1833	61.9706	80.2632	80.0634	94.3598	89.8801	102.01	101.142	112.456	96.77	94.3667	89.5916	88.89	84.8635	84.3052	80.8602	80.3794	92.3013	92.4751	104.333	104.482	114.792	115.111	125.663	126.033	137.857	138.327	148.416	148.989
Magma Melt SiO2 (wt. %)	53.8238	53.8771	53.9298	53.982	54.0338	54.085	54.1357	54.1859	54.2356	54.2849	54.3337	54.382	54.4299	54.4773	54.5243	54.5804	54.6473	54.7154	54.7847	54.8557	55.0196	55.1804	55.3384	55.4122	55.568	57.7109	57.8766	59.1945	59.4406	57.3342	57.8243	57.9085	58.0783	58.1629	58.3274	58.4121	58.5833	58.7387	58.9504	59.1215	59.34	59.5092	59.7417	60.0549	60.3193	60.7063	60.9898	61.3545	61.6384
Magma Melt K2O (wt. %)	2.08593	2.0939	2.10177	2.10955	2.11723	2.12481	2.13229	2.13968	2.14698	2.15419	2.16131	2.16834	2.17528	2.18213	2.1889	2.2115	2.24878	2.28531	2.32109	2.35635	2.42402	2.49113	2.55772	2.57186	2.63802	3.04514	3.11138	3.35767	3.43106	2.89205	2.98897	3.02286	3.05641	3.08938	3.12168	3.15375	3.1872	3.25061	3.29223	3.35925	3.4017	3.4686	3.51381	3.59478	3.64389	3.73107	3.78422	3.86993	3.92568
Magma Melt SiO2 (wt. %)	53.8238	53.8771	53.9298	53.982	54.0338	54.085	54.1357	54.1859	54.2356	54.2849	54.3337	54.382	54.4299	54.4773	54.5243	54.5804	54.6473	54.7154	54.7847	54.8557	55.0196	55.1804	55.3384	55.4122	55.568	57.7109	57.8766	59.1945	59.4406	57.3342	57.8243	57.9085	58.0783	58.1629	58.3274	58.4121	58.5833	58.7387	58.9504	59.1215	59.34	59.5092	59.7417	60.0549	60.3193	60.7063	60.9898	61.3545	61.6384
Sr conc in melt, magma chamber	1205.16	1209.76	1214.31	1218.8	1223.23	1227.61	1231.93	1236.2	1240.42	1244.58	1248.69	1252.75	1256.76	1260.72	1264.63	1276.18	1294.72	1312.78	1330.37	1347.14	1311.64	1276.92	1242.92	1240.61	1207.31	1135.61	1103.42	1054.97	1022.02	1137.67	1123.65	1134.24	1129.24	1139.29	1134.22	1143.77	1138.27	1110.13	1101.61	1069.74	1061.11	1030.06	1020.66	986.713	976.69	943.418	932.548	900.573	889.392
Magma Melt SiO2 (wt. %)	53.8238	53.8771	53.9298	53.982	54.0338	54.085	54.1357	54.1859	54.2356	54.2849	54.3337	54.382	54.4299	54.4773	54.5243	54.5804	54.6473	54.7154	54.7847	54.8557	55.0196	55.1804	55.3384	55.4122	55.568	57.7109	57.8766	59.1945	59.4406	57.3342	57.8243	57.9085	58.0783	58.1629	58.3274	58.4121	58.5833	58.7387	58.9504	59.1215	59.34	59.5092	59.7417	60.0549	60.3193	60.7063	60.9898	61.3545	61.6384
Ba conc in melt, magma chamber	687.091	689.716	692.308	694.868	697.396	699.893	702.358	704.792	707.195	709.568	711.912	714.226	716.512	718.769	720.998	728.436	740.707	752.727	764.5	776.07	793.319	810.274	826.954	827.543	843.887	860.037	874.144	883.072	897.572	823.619	829.055	838.441	840.231	849.279	850.873	859.601	861.127	874.22	876.024	889.353	890.973	904.033	905.746	921.339	923.16	938.831	940.819	955.987	958.585
Magma Melt SiO2 (wt. %)	53.8238	53.8771	53.9298	53.982	54.0338	54.085	54.1357	54.1859	54.2356	54.2849	54.3337	54.382	54.4299	54.4773	54.5243	54.5804	54.6473	54.7154	54.7847	54.8557	55.0196	55.1804	55.3384	55.4122	55.568	57.7109	57.8766	59.1945	59.4406	57.3342	57.8243	57.9085	58.0783	58.1629	58.3274	58.4121	58.5833	58.7387	58.9504	59.1215	59.34	59.5092	59.7417	60.0549	60.3193	60.7063	60.9898	61.3545	61.6384
Zr conc in BULK cum solids, magma chamber	0.240032	0.240917	0.241373	0.241816	0.242252	0.242681	0.243103	0.243519	0.243929	0.244332	0.24473	0.245121	0.245507	0.245888	0.246262	9.98055	22.5459	30.5405	36.1578	40.3398	38.6457	37.6077	36.9292	37.0627	36.6233	41.6633	41.5021	44.1624	43.7108	39.4137	41.0227	44.367	44.8707	47.848	48.2705	50.9575	51.3412	51.1141	51.3478	50.5769	50.7684	50.1429	50.2834	49.3096	49.3397	49.7189	49.7085	49.9459	49.7705
Magma Melt SiO2 (wt. %)	53.8238	53.8771	53.9298	53.982	54.0338	54.085	54.1357	54.1859	54.2356	54.2849	54.3337	54.382	54.4299	54.4773	54.5243	54.5804	54.6473	54.7154	54.7847	54.8557	55.0196	55.1804	55.3384	55.4122	55.568	57.7109	57.8766	59.1945	59.4406	57.3342	57.8243	57.9085	58.0783	58.1629	58.3274	58.4121	58.5833	58.7387	58.9504	59.1215	59.34	59.5092	59.7417	60.0549	60.3193	60.7063	60.9898	61.3545	61.6384
Zr conc in melt, magma chamber	240.032	240.948	241.853	242.747	243.629	244.501	245.361	246.211	247.05	247.879	248.697	249.505	250.302	251.09	251.868	253.879	257.008	260.051	263.01	265.915	272.945	279.918	286.842	290.385	297.32	377.771	385.531	424.49	433.45	353.842	366.361	369.31	373.409	376.254	379.982	382.727	386.34	393.414	397.575	405.264	409.059	416.74	420.276	429.676	432.883	442.48	445.102	454.549	456.488
SiO2	53.8238	53.8771	53.9298	53.982	54.0338	54.085	54.1357	54.1859	54.2356	54.2849	54.3337	54.382	54.4299	54.4773	54.5243	54.5804	54.6473	54.7154	54.7847	54.8557	55.0196	55.1804	55.3384	55.4122	55.568	57.7109	57.8766	59.1945	59.4406	57.3342	57.8243	57.9085	58.0783	58.1629	58.3274	58.4121	58.5833	58.7387	58.9504	59.1215	59.34	59.5092	59.7417	60.0549	60.3193	60.7063	60.9898	61.3545	61.6384
Na2O+Na2O	8.1817	8.21297	8.24385	8.27434	8.30446	8.33419	8.36355	8.39254	8.42117	8.44944	8.47736	8.50493	8.53215	8.55903	8.58558	8.67038	8.80896	8.94448	9.07698	9.20669	9.35636	9.5001	9.63807	9.62803	9.75872	9.40372	9.48459	9.22761	9.28958	9.03033	8.95586	9.05145	9.02345	9.1149	9.08505	9.1726	9.13866	9.20894	9.16209	9.22216	9.16873	9.22054	9.15997	9.21947	9.1483	9.21031	9.12561	9.17424	9.08229
[truncated: 18 more columns]

## Sheet: Traces_1_Magma
		Ksm	Ksm	Ksm	Ksm	Ksm	Ksm	Isotope 1			Recharge 1 Conc	Recharge 1 Isotope 1			Recharge 2 Conc	Recharge 2 Isotope 1
Element	Inital conc	olivine {1}	clinopyroxene {1}	feldspar {1}	spinel {1}	apatite {1}	orthopyroxene {1}
Sr	1205	0.0004	0.1283/1130/1.65/740	3.2487/1130/6.815/740	0.0006/1130/0.2935/740	1	0.0012/1130/0.124/740	0.702819			1205	0.702819			1320	0.702819
Zr	240	0.001	0.26/1130/0.685/740	0.04/1130/0.14/740	0.015/1130/0.137/740	1	0.032/1130/0.0805/740				240				211
Ba	687	0.0003	0.0007/1130/0.692/740	0.459/1130/0.375/740	0.0005/1130/0.1/740	1	0.0005/1130/0.0735/740				687				1040
Magma Chamber Process	Magma Temperature (°C)	Wallrock Temperature (°C)	Total Magma Chamber Mass (grams )	Magma Liquid Mass (grams)	Magma: Total Incremental Mass of Crystals (Cumulates) removed as Cumulates (grams)	Magma: Total Cumulative Mass of Crystals (Cumulates) removed as Cumulates (grams)	Magma: Incremental Fluid Phase Mass	Magma: Cumulative Fluid Phase Mass	Magma: Mass Fraction of H2O in Incremental Fluid Phase	Magma Mineral olivine {1} : Incremental Mass (grams) Removed in this Temperature Step	Magma olivine {1} : Total Mass (grams) Removed across all Temperature Steps	Magma Mineral clinopyroxene {1} : Incremental Mass (grams) Removed in this Temperature Step	Magma clinopyroxene {1} : Total Mass (grams) Removed across all Temperature Steps	Magma Mineral feldspar {1} : Incremental Mass (grams) Removed in this Temperature Step	Magma feldspar {1} : Total Mass (grams) Removed across all Temperature Steps	Magma Mineral spinel {1} : Incremental Mass (grams) Removed in this Temperature Step	Magma spinel {1} : Total Mass (grams) Removed across all Temperature Steps	Magma Mineral apatite {1} : Incremental Mass (grams) Removed in this Temperature Step	Magma apatite {1} : Total Mass (grams) Removed across all Temperature Steps	Magma Mineral orthopyroxene {1} : Incremental Mass (grams) Removed in this Temperature Step	Magma orthopyroxene {1} : Total Mass (grams) Removed across all Temperature Steps	Magma Melt SiO2 (wt. %)	Magma Melt TiO2 (wt. %)	Magma Melt Al2O3 (wt. %)	Magma Melt Fe2O3 (wt. %)	Magma Melt Cr2O3 (wt. %)	Magma Melt FeO (wt. %)	Magma Melt MnO (wt. %)	Magma Melt MgO (wt. %)	Magma Melt NiO (wt. %)	Magma Melt CoO (wt. %)	Magma Melt CaO (wt. %)	Magma Melt Na2O (wt. %)	Magma Melt K2O (wt. %)	Magma Melt P2O5 (wt. %)	Magma Melt H2O (wt. %)	Magma Melt CO2 (wt. %)	> Elements + Isotopes >	Sr conc in melt, magma chamber	Sr isotopic composition in melt, magma chamber	Zr conc in melt, magma chamber	Ba conc in melt, magma chamber	> M Solids, content >	Sr conc in inst olivine {1}	Zr conc in inst olivine {1}	Ba conc in inst olivine {1}	Sr conc in inst clinopyroxene {1}	Zr conc in inst clinopyroxene {1}	Ba conc in inst clinopyroxene {1}
AFC	1085	791.436	100.289	81.473	0.0730308	18.8162	0	0	0	0.00450836	5.75692	0.0630684	8.97026	0.00545402	4.08904	0	0	0	0	0	0	55.4122	1.10662	15.3903	1.07595	0	5.62089	0.151194	3.54535	0	0	7.91337	4.81401	2.57186	1.15937	1.2389	0		1205.16	0.702819	240.032	687.091		0.482064	0.240032	0.206127
AFC	1058.92	792.359	109.402	86.4901	1.95979	22.9115	0	0	0	0.10054	6.12317	1.65165	11.2572	0.207602	5.53111	0	0	0	0	0	0	57.7109	1.04702	14.8362	0.967671	0	5.07977	0.170319	2.82177	0	0	6.99654	4.70186	3.04514	1.20031	1.42247	0		1209.76	0.702819	240.948	689.716		0.483905	0.240948	0.206915
AFC	1040.13	794.445	115.776	89.7229	1.20198	26.0535	0	0	0	0.0705781	6.44101	0.880761	12.6136	0.250639	6.99887	0	0	0	0	0	0	59.1945	1.01577	14.4166	0.907387	0	4.73328	0.178336	2.39517	0	0	6.42889	4.61381	3.35767	1.21595	1.54261	0		1214.31	0.702819	241.853	692.308		0.485724	0.241853	0.207693
AFC	1075.92	798.224	194.906	161.41	0.84156	33.4965	0	0	0	0.0082452	10.6991	0.833315	14.3846	0	8.30953	0	0.103299	0	0	0	0	57.8243	1.00608	14.5767	0.954072	0	4.77812	0.156224	3.27391	0	0	7.44876	4.47793	2.98897	1.13107	1.38386	0		1218.8	0.702819	242.747	694.868		0.48752	0.242747	0.208461
AFC	1069.15	806.651	196.369	160.781	0.282628	35.5889	0	0	0	0	10.6975	0.282628	16.4785	0	8.30953	0	0.103299	0	0	0	0	58.0783	1.0026	14.6677	0.931413	0	4.71842	0.158606	3.0914	0	0	7.23273	4.51173	3.05641	1.14135	1.40937	0		1223.23	0.702819	243.629	697.396		0.489293	0.243629	0.209219
AFC	1062.49	814.687	197.805	160.249	0.251117	37.5556	0	0	0	0	10.6975	0.251117	18.4452	0	8.30953	0	0.103299	0	0	0	0	58.3274	0.998743	14.7523	0.909255	0	4.6582	0.160791	2.91944	0	0	7.02673	4.54253	3.12168	1.1505	1.43248	0		1227.61	0.702819	244.501	699.893		0.491045	0.244501	0.209968
AFC	1055.82	822.893	199.321	159.897	0.238851	39.4242	0	0	0	0	10.6975	0.238851	20.3139	0	8.30953	0	0.103299	0	0	0	0	58.5833	0.99419	14.829	0.886948	0	4.59496	0.162818	2.75469	0	0	6.82544	4.56933	3.1872	1.15832	1.45377	0		1231.93	0.702819	245.361	702.358		0.492774	0.245361	0.210707
AFC	1048.92	832.536	201.192	158.164	0.325844	43.0285	0	0	0	0.0217454	10.9879	0.208812	21.5552	0.0952868	10.3822	0	0.103299	0	0	0	0	58.9504	1.00294	14.6913	0.880988	0	4.55287	0.165378	2.60549	0	0	6.60998	4.58104	3.29223	1.17702	1.49034	0		1236.2	0.702819	246.211	704.792		0.494481	0.246211	0.211437
AFC	1042.08	842.201	203.167	156.512	0.290458	46.6544	0	0	0	0.0220917	11.4237	0.175132	22.4858	0.0932341	12.6416	0	0.103299	0	0	0	0	59.34	1.01379	14.5294	0.878737	0	4.49562	0.167186	2.45056	0	0	6.41737	4.58437	3.4017	1.19525	1.52604	0		1240.42	0.702819	247.05	707.195		0.496167	0.24705	0.212159
AFC	1035.19	852.014	205.296	155.128	0.314126	50.1679	0	0	0	0.02989	11.856	0.155394	23.3263	0.128843	14.8824	0	0.103299	0	0	0	0	59.7417	1.02454	14.3622	0.876208	0	4.43173	0.168672	2.3012	0	0	6.22914	4.57998	3.51381	1.2116	1.5592	0		1244.58	0.702819	247.879	709.568		0.497832	0.247879	0.212871
AFC	1028.34	862.216	207.676	153.478	0.32416	54.1974	0	0	0	0.0311238	12.3313	0.104888	23.9594	0.150577	17.4273	0.0425941	0.465214	0	0.0141589	0	0	60.3193	1.00536	14.1799	0.789592	0	4.287	0.170224	2.15346	0	0	6.0553	4.57415	3.64389	1.22642	1.5954	0		1248.69	0.702819	248.697	711.912		0.499477	0.248697	0.213574
AFC	1021.43	872.766	210.359	152.034	0.324624	58.3247	0	0	0	0.0341622	12.8154	0.0804667	24.5205	0.17606	19.9747	0.0389577	0.81177	0	0.20241	0	0	60.9898	0.987076	14.0077	0.70843	0	4.13658	0.171468	2.00889	0	0	5.82387	4.5628	3.78422	1.19126	1.62783	0		1252.75	0.702819	249.505	714.226		0.5011	0.249505	0.214268
AFC	1014.65	882.997	213.223	150.94	0.37459	62.2835	0	0	0	0	13.2328	0	24.9466	0.221253	22.4916	0.0318282	1.12415	0	0.358011	0.130393	0.130393	61.6384	0.971041	13.8318	0.636768	0	3.98473	0.172515	1.86801	0	0	5.61258	4.54114	3.92568	1.16149	1.65592	0		1256.76	0.702819	250.302	716.512		0.502703	0.250302	0.214954
AFC	1007.98	893.022	216.358	150.029	0.439576	66.3296	0	0	0	0	13.2328	0	25.1638	0.240215	25.0473	0.02435	1.41394	0	0.501616	0.182274	0.970167	62.2537	0.958178	13.6568	0.571101	0	3.84035	0.175746	1.72163	0	0	5.41984	4.51309	4.07538	1.13291	1.68126	0		1260.72	0.702819	251.09	718.769		0.504287	0.25109	0.215631
AFC	1001.38	902.674	219.784	149.617	0.413949	70.1678	0	0	0	0	13.2328	0	25.1855	0.233456	27.6136	0.0194293	1.68164	0	0.621616	0.168328	1.83265	62.8582	0.947474	13.4696	0.513154	0	3.69551	0.178371	1.58739	0	0	5.24805	4.47075	4.22486	1.10658	1.70005	0		1264.63	0.702819	251.868	720.998		0.50585	0.251868	0.216299
AFC	1019.8	911.964	293.604	189.816	0.433014	103.788	0	0	0	0	13.2328	0	40.5397	0.267316	38.3577	0.0215689	7.69125	0	0.713164	0.146347	3.25361	63.4325	0.780868	13.8991	1.0105	0	1.82697	0.18694	1.99736	0	0	5.1688	4.57945	4.5508	1.21631	1.35037	0		1276.18	0.702819	253.879	728.436		0.510473	0.253879	0.218531	170.451	67.0227	0.568371
AFC	1012.96	923.138	299.15	190.888	0.538991	108.262	0	0	0	0	13.2328	0	40.5848	0.341924	41.6521	0.0227898	7.95229	0	0.713164	0.176495	4.12684	63.9938	0.791865	13.6889	0.933641	0	1.75782	0.18779	1.85469	0	0	5.0192	4.50404	4.70029	1.21302	1.35496	0		1294.72	0.702819	257.008	740.707		0.51789	0.257008	0.222212	176.756	68.4147	0.613148
AFC	1006.27	934.594	305.651	193.064	0.524936	112.588	0	0	0	0	13.2328	0	40.5848	0.341139	44.8993	0.0169597	8.19377	0	0.713164	0.166837	4.96384	64.5787	0.801215	13.4817	0.862091	0	1.69412	0.187245	1.71744	0	0	4.8619	4.41462	4.84892	1.20229	1.34978	0		1312.78	0.702819	260.051	752.727		0.525114	0.260051	0.225818	183.226	69.8073	0.661404
AFC	999.839	945.602	312.877	196.102	0.498969	116.775	0	0	0	0	13.2328	0	40.5848	0.335583	48.0842	0.0113186	8.41657	0	0.713164	0.152068	5.74366	65.1698	0.807226	13.283	0.797381	0	1.63856	0.185516	1.58881	0	0	4.69902	4.31915	4.98933	1.18585	1.33638	0		1330.37	0.702819	263.01	764.5		0.532148	0.26301	0.22935	189.867	71.2012	0.71343
AFC	993.706	956.168	321.868	201.026	0.465328	120.842	0	0	0	0	13.2328	0	40.5848	0.318605	51.212	0.00402398	8.62109	0	0.713164	0.142699	6.47817	65.8089	0.807375	13.0902	0.738771	0	1.5927	0.181854	1.46344	0	0	4.51599	4.21163	5.12136	1.15845	1.30931	0		1347.14	0.702819	265.915	776.07		0.538856	0.265915	0.232821	196.635	72.6046	0.769585
AFC	988.627	974.094	323.94	199.476	0.0669561	124.464	0	0	0	0	13.2328	0	40.5848	0.0440777	54.0555	0.000993899	8.81416	0	0.713164	0.0218845	7.06356	66.0865	0.8113	12.9474	0.697089	0	1.55339	0.183446	1.39503	0	0	4.45202	4.17363	5.21184	1.16778	1.32062	0		1311.64	0.702819	272.945	793.319		0.524658	0.272945	0.237996	195.85	75.1683	0.836423
FC	1195.7	700.025	100	99.9868	0.0131792	0.0131792	0	0	0	0.0131792	0.0131792	0	0	0	0	0	0	0	0	0	0	53.8238	0.972083	14.2066	1.06322	0	6.02301	0.141724	6.73788	0	0	8.91071	4.09085	2.08593	0.941706	1.00246	0		1276.92	0.702819	279.918	810.274		0.510766	0.279918	0.243082	195.084	77.7616	0.908817
FC	1190.7	703.786	100	99.6061	0.380701	0.39388	0	0	0	0.380701	0.39388	0	0	0	0	0	0	0	0	0	0	53.8771	0.975799	14.2609	1.06728	0	5.9907	0.141141	6.59183	0	0	8.94329	4.10649	2.0939	0.945305	1.00629	0		1242.92	0.702819	286.842	826.954		0.497168	0.286842	0.248086	194.332	80.3869	0.987279
FC	1185.7	707.524	100	99.233	0.373109	0.766989	0	0	0	0.373109	0.766989	0	0	0	0	0	0	0	0	0	0	53.9298	0.979467	14.3145	1.07129	0	5.95804	0.140552	6.44824	0	0	8.97544	4.12193	2.10177	0.948859	1.01008	0		1240.61	0.702834	290.385	827.543		0.496243	0.290385	0.248263	194.602	81.4805	0.9967
FC	1180.7	711.241	100	98.8673	0.365707	1.1327	0	0	0	0.365707	1.1327	0	0	0	0	0	0	0	0	0	0	53.982	0.98309	14.3675	1.07526	0	5.92503	0.139955	6.30708	0	0	9.00718	4.13717	2.10955	0.952369	1.01381	0		1207.31	0.702834	297.32	843.887		0.482925	0.29732	0.253166	193.857	84.169	1.08258
FC	1175.7	714.936	100	98.5088	0.35849	1.49119	0	0	0	0.35849	1.49119	0	0	0	0	0	0	0	0	0	0	54.0338	0.986668	14.4197	1.07917	0	5.89168	0.139352	6.16833	0	0	9.03851	4.15223	2.11723	0.955835	1.0175	0		1135.61	0.703312	377.771	860.037		0.454243	0.377771	0.258011	201.718	111.12	1.44911
FC	1170.7	718.61	100	98.1574	0.351452	1.84264	0	0	0	0.351452	1.84264	0	0	0	0	0	0	0	0	0	0	54.085	0.990201	14.4714	1.08303	0	5.858	0.138742	6.03195	0	0	9.06944	4.1671	2.12481	0.959257	1.02114	0		1103.42	0.703312	385.531	874.144		0.441367	0.385531	0.262243	200.869	114.462	1.57375
FC	1165.7	722.263	100	97.8128	0.344591	2.18723	0	0	0	0.344591	2.18723	0	0	0	0	0	0	0	0	0	0	54.1357	0.993689	14.5224	1.08685	0	5.82398	0.138126	5.89793	0	0	9.09996	4.18178	2.13229	0.962637	1.02474	0		1054.97	0.703645	424.49	883.072		0.42199	0.42449	0.264922	205.738	129.363	1.91462
FC	1160.7	725.897	100	97.4749	0.337901	2.52513	0	0	0	0.337901	2.52513	0	0	0	0	0	0	0	0	0	0	54.1859	0.997134	14.5727	1.09062	0	5.78963	0.137503	5.76622	0	0	9.13008	4.19627	2.13968	0.965974	1.02829	0		1022.02	0.703645	433.45	897.572		0.408809	0.43345	0.269272	204.446	133.374	2.08438
FC	1155.7	729.512	100	97.1435	0.331379	2.85651	0	0	0	0.331379	2.85651	0	0	0	0	0	0	0	0	0	0	54.2356	1.00054	14.6224	1.09434	0	5.75495	0.136874	5.63681	0	0	9.15982	4.21059	2.14698	0.969269	1.0318	0		1137.67	0.70323	353.842	823.619		0.455067	0.353842	0.247086	181.818	99.9917	1.04326
FC	1150.7	733.107	100	96.8185	0.325021	3.18153	0	0	0	0.325021	3.18153	0	0	0	0	0	0	0	0	0	0	54.2849	1.00389	14.6715	1.09801	0	5.71995	0.136239	5.50965	0	0	9.18917	4.22472	2.15419	0.972523	1.03527	0		1123.65	0.703345	366.361	829.055		0.449461	0.366361	0.248716	183.932	104.474	1.12031
FC	1145.7	736.685	100	96.4996	0.318822	3.50035	0	0	0	0.318822	3.50035	0	0	0	0	0	0	0	0	0	0	54.3337	1.00721	14.72	1.10164	0	5.68463	0.135597	5.38473	0	0	9.21813	4.23868	2.16131	0.975736	1.03869	0		1134.24	0.703345	369.31	838.441					190.13	106.269	1.20807
FC	1140.7	740.245	100	96.1869	0.31278	3.81313	0	0	0	0.31278	3.81313	0	0	0	0	0	0	0	0	0	0	54.382	1.01049	14.7678	1.10522	0	5.64899	0.13495	5.26201	0	0	9.24673	4.25246	2.16834	0.978909	1.04206	0		1129.24	0.703386	373.409	840.231					190.896	107.793	1.23857
FC	1135.7	743.787	100	95.88	0.306891	4.12002	0	0	0	0.306891	4.12002	0	0	0	0	0	0	0	0	0	0	54.4299	1.01372	14.8151	1.10876	0	5.61303	0.134296	5.14147	0	0	9.27495	4.26607	2.17528	0.982042	1.0454	0		1139.29	0.703386	376.254	849.279					197.287	109.61	1.33596
FC	1130.7	747.313	100	95.5788	0.301151	4.42117	0	0	0	0.301151	4.42117	0	0	0	0	0	0	0	0	0	0	54.4773	1.01691	14.8618	1.11225	0	5.57676	0.133636	5.02307	0	0	9.30281	4.27952	2.18213	0.985136	1.04869	0		1134.22	0.703427	379.982	850.873					197.994	111.034	1.36781
FC	1125.7	750.823	100	95.2833	0.295558	4.71673	0	0	0	0.295558	4.71673	0	0	0	0	0	0	0	0	0	0	54.5243	1.02007	14.9079	1.1157	0	5.54017	0.132971	4.90679	0	0	9.33031	4.29279	2.1889	0.988192	1.05195	0		1143.77	0.703427	382.727	859.601					204.587	112.875	1.47583
FC	1120.7	755.494	100	94.3096	0.973713	5.69045	0	0	0	0.144209	4.86094	0.829504	0.829504	0	0	0	0	0	0	0	0	54.5804	1.02501	15.0233	1.10988	0	5.52584	0.133797	4.75432	0	0	9.23953	4.33519	2.2115	0.998395	1.06281	0		1138.27	0.70347	386.34	861.127					205.278	114.295	1.51153
FC	1115.7	761.164	100	92.7459	1.56363	7.25408	0	0	0	0.00322189	4.86416	1.56041	2.38991	0	0	0	0	0	0	0	0	54.6473	1.03084	15.2008	1.09485	0	5.53145	0.13604	4.57035	0	0	9.03915	4.40448	2.24878	1.01523	1.08073	0		1110.13	0.70347	393.414	874.22		0.44405	0.393414	0.262266	205.204	117.482	1.64024
FC	1110.7	766.674	100	91.2636	1.48235	8.73643	0	0	0	0.0030777	4.86724	1.47927	3.86919	0	0	0	0	0	0	0	0	54.7154	1.03578	15.3726	1.07959	0	5.53503	0.138236	4.3925	0	0	8.84335	4.47224	2.28531	1.03172	1.09828	0		1101.61	0.703527	397.575	876.024		0.440643	0.397575	0.262807	205.56	119.15	1.68602
FC	1105.7	772.036	100	89.8568	1.40678	10.1432	0	0	0	0.0031474	4.87039	1.40363	5.27282	0	0	0	0	0	0	0	0	54.7847	1.03984	15.5388	1.06411	0	5.53662	0.140386	4.22056	0	0	8.65208	4.53849	2.32109	1.04787	1.11547	0		1069.74	0.703527	405.264	889.353		0.427897	0.405264	0.266806	204.668	122.612	1.83124
FC	1100.7	777.27	100	88.5115	1.34531	11.4885	0	0	0	0.00547417	4.87586	1.33019	6.60301	0.00964201	0.00964201	0	0	0	0	0	0	54.8557	1.04314	15.698	1.04863	0	5.53656	0.142494	4.05429	0	0	8.46528	4.60334	2.35635	1.0638	1.13243	0		1061.11	0.703591	409.059	890.973		0.424445	0.409059	0.267292	204.91	124.197	1.88112
FC	1095.7	783.921	100	85.9391	2.57238	14.0609	0	0	0	0.3067	5.18256	0.839311	7.44232	1.42637	1.43601	0	0	0	0	0	0	55.0196	1.06567	15.6025	1.05903	0	5.57425	0.145198	3.88592	0	0	8.28366	4.67818	2.42402	1.09564	1.16632	0		1030.06	0.703591	416.74	904.033		0.412023	0.41674	0.27121	204.017	127.75	2.04383
FC	1090.7	790	100	83.5262	2.4129	16.4738	0	0	0	0.291643	5.4742	0.765543	8.20786	1.35572	2.79173	0	0	0	0	0	0	55.1804	1.08772	15.5047	1.0695	0	5.60858	0.147793	3.72373	0	0	8.10908	4.75005	2.49113	1.12729	1.20002	0		1020.66	0.703663	420.276	905.746		0.408263	0.420276	0.271724	204.118	129.307	2.10184
FC	1085.7	789.908	100	81.2568	2.26939	18.7432	0	0	0	0.278206	5.75241	0.699335	8.9072	1.29185	4.08358	0	0	0	0	0	0	55.3384	1.10932	15.4045	1.08006	0	5.63963	0.150277	3.56745	0	0	7.9413	4.81903	2.55772	1.15877	1.23353	0		986.713	0.703663	429.676	921.339		0.394685	0.429676	0.276402	202.462	133.493	2.29151
FC	1080	791.436	100.289	79.3375	2.13546	20.9517	0	0	0	0.265716	6.02263	0.635275	9.60554	1.23447	5.32351	0	0	0	0	0	0	55.568	1.12768	15.2876	1.08652	0	5.64783	0.153565	3.39558	0	0	7.7531	4.87936	2.63802	1.19058	1.27225	0		976.69	0.703749	432.883	923.16		0.390676	0.432883	0.276948	202.329	134.977	2.35601
FC	1053.92	792.359	109.402	84.55	1.94003	24.8515	0	0	0	0.247253	6.37043	0.475654	11.7328	1.21712	6.74823	0	0	0	0	0	0	57.8766	1.06506	14.7224	0.976705	0	5.08205	0.172278	2.70051	0	0	6.86777	4.7423	3.11138	1.22785	1.4551	0		943.418	0.703749	442.48	938.831		0.377367	0.44248	0.281649	200.588	139.338	2.57039
FC	1035.13	794.445	115.776	87.6904	2.03249	28.086	0	0	0	0.256456	6.69746	0.357222	12.9708	1.31337	8.31224	0.105439	0.105439	0	0	0	0	59.4406	1.01751	14.2917	0.873185	0	4.6852	0.180181	2.28686	0	0	6.32636	4.64479	3.43106	1.24414	1.57837	0		932.548	0.703853	445.102	940.819		0.373019	0.445102	0.282246	200.271	140.697	2.64637
FC	1070.92	798.224	194.906	159.6	1.80971	35.3062	0	0	0	0	10.6975	1.81127	16.1959	0	8.30953	0	0.103299	0	0	0	0	57.9085	1.00826	14.6932	0.940772	0	4.7592	0.158	3.13868	0	0	7.30137	4.52572	3.02286	1.1439	1.39955	0		900.573	0.703853	454.549	955.987		0.360229	0.454549	0.286796	198.573	145.128	2.88751
FC	1064.15	806.651	196.369	159.065	1.71559	37.3045	0	0	0	0	10.6975	1.71559	18.1941	0	8.30953	0	0.103299	0	0	0	0	58.1629	1.00413	14.7785	0.918127	0	4.69757	0.160317	2.96238	0	0	7.09103	4.55745	3.08938	1.15366	1.42457	0		889.392	0.703968	456.488	958.585
FC	1057.49	814.687	197.805	158.619	1.62979	39.1854	0	0	0	0	10.6975	1.62979	20.075	0	8.30953	0	0.103299	0	0	0	0	58.4121	0.999671	14.8578	0.895976	0	4.63576	0.162443	2.79653	0	0	6.8902	4.5863	3.15375	1.16232	1.4472	0		858.181	0.703968	466.474	974.338					196.192	150.992	3.2447
FC	1050.82	822.893	199.321	156.618	3.27848	42.7027	0	0	0	0.26863	10.9662	1.03248	21.3463	1.97737	10.2869	0	0.103299	0	0	0	0	58.7387	1.00878	14.7362	0.890808	0	4.60202	0.165113	2.65242	0	0	6.68414	4.60447	3.25061	1.18256	1.4842	0		847.023	0.704101	467.534	978.085
FC	1043.92	832.536	201.192	154.828	3.33539	46.3639	0	0	0	0.413673	11.4016	0.755537	22.3107	2.16618	12.5484	0	0.103299	0	0	0	0	59.1215	1.01974	14.5754	0.888835	0	4.54659	0.167107	2.49497	0	0	6.49078	4.61108	3.35925	1.20237	1.52245	0		815.678	0.704101	477.5	993.162					193.333	156.692	3.64616
FC	1037.08	842.201	203.167	153.313	3.19938	49.8538	0	0	0	0.402404	11.8261	0.685036	23.1709	2.11194	14.7535	0	0.103299	0	0	0	0	59.5092	1.03035	14.4119	0.886645	0	4.48557	0.168774	2.34556	0	0	6.30504	4.61027	3.4686	1.22019	1.55788	0		804.694	0.704252	477.177	998.244
FC	1030.19	852.014	205.296	151.423	3.70533	53.8732	0	0	0	0.444191	12.3002	0.528289	23.8545	2.39435	17.2767	0.319321	0.42262	0.0191821	0.0191821	0	0	60.0549	1.01479	14.2333	0.809833	0	4.35287	0.17055	2.19611	0	0	6.13006	4.60973	3.59478	1.23588	1.59713	0		774.987	0.704252	486.885	1012.81
FC	1023.34	862.216	207.676	149.676	3.80272	58.0001	0	0	0	0.449937	12.7812	0.480604	24.44	2.37131	19.7986	0.307598	0.772812	0.193275	0.207433	0	0	60.7063	0.995851	14.0658	0.727131	0	4.20547	0.172103	2.05126	0	0	5.90343	4.60516	3.73107	1.20285	1.63362	0		932.544	0.703609	448.44	1162.83					200.397	141.786	3.27645
FC	1016.43	872.766	210.359	148.45	3.58421	61.9089	0	0	0	0.419019	13.2344	0.428335	24.9488	2.29567	22.2704	0.280556	1.09233	0.160624	0.363034	0	0	61.3545	0.977561	13.8897	0.652168	0	4.0552	0.173176	1.91465	0	0	5.68658	4.58712	3.86993	1.17416	1.6652	0		919.878	0.703727	447.649	1166.54
FC	1009.65	882.997	213.223	147.333	3.60648	65.89	0	0	0	0	13.2328	0.219459	25.1661	2.31545	24.8071	0.265438	1.38959	0.148629	0.506639	0.6575	0.787893	61.9559	0.962651	13.7102	0.584035	0	3.91633	0.176738	1.77593	0	0	5.49798	4.56287	4.01559	1.14716	1.69465	0		885.677	0.703727	456.627	1182.97					196.989	146.271	3.65776
FC	1002.98	893.022	216.358	146.605	3.42423	69.7538	0	0	0	0	13.2328	0.0238882	25.1877	2.33289	27.3802	0.248265	1.66221	0.125023	0.626639	0.69416	1.66433	62.5521	0.950413	13.52	0.524234	0	3.77102	0.179851	1.63908	0	0	5.33128	4.52596	4.16386	1.12323	1.719	0		868.696	0.703898	453.29	1198.35
FC	996.381	902.674	219.784	146.38	3.23641	73.4042	0	0	0	0	13.2328	0	25.1855	2.26166	29.8753	0.229504	1.91114	0.0965716	0.718187	0.64868	2.48133	63.1375	0.939704	13.3304	0.470785	0	3.6267	0.182315	1.51174	0	0	5.17256	4.47749	4.31126	1.10308	1.73645	0		836.299	0.703898	462.037	1214.42
FC	1014.8	911.964	293.604	185.881	3.93488	107.723	0	0	0	0	13.2328	0.0473678	40.5871	2.95253	41.3102	0.238247	7.9295	0	0.713164	0.696732	3.95035	63.6484	0.787224	13.7508	0.959514	0	1.78077	0.190897	1.92061	0	0	5.12417	4.57819	4.63842	1.24205	1.37895	0		818.284	0.704096	455.746	1259.21
FC	1007.96	923.138	299.15	187.088	3.80077	112.063	0	0	0	0	13.2328	0	40.5848	2.90608	44.5582	0.224526	8.17681	0	0.713164	0.670165	4.79701	64.2029	0.798183	13.5405	0.886235	0	1.71212	0.191605	1.78391	0	0	4.98076	4.49712	4.78655	1.23766	1.38249	0		788.059	0.704096	464.168	1275.34
FC	1001.27	934.594	305.651	189.375	3.68855	116.276	0	0	0	0	13.2328	0	40.5848	2.84932	47.7486	0.211484	8.40526	0	0.713164	0.627751	5.59159	64.7822	0.807355	13.3364	0.817909	0	1.64921	0.190892	1.65182	0	0	4.8259	4.40284	4.93367	1.2257	1.37607	0		771.22	0.704331	455.102	1314.73
FC	994.839	945.602	312.877	192.501	3.60145	120.377	0	0	0	0	13.2328	0	40.5848	2.80915	50.8934	0.200488	8.61706	0	0.713164	0.591809	6.33547	65.3683	0.813175	13.141	0.756137	0	1.59449	0.188987	1.52793	0	0	4.66537	4.30281	5.07244	1.20803	1.36138	0		743	0.704331	463.172	1330.85
FC	988.706	956.168	321.868	197.471	3.55501	124.397	0	0	0	0	13.2328	0	40.5848	2.79943	54.0114	0.192077	8.81316	0	0.713164	0.563503	7.04167	66.0033	0.813105	12.9516	0.700204	0	1.54947	0.185128	1.40703	0	0	4.48454	4.19075	5.20268	1.1793	1.33288	0		726.448	0.704642	449.596	1365.68
FC	983.627	974.094	323.94	196.047	3.42873	127.893	0	0	0	0	13.2328	0	40.5848	2.71449	56.77	0.181532	8.99569	0	0.713164	0.53271	7.59627	66.2755	0.81683	12.8111	0.660473	0	1.51083	0.186654	1.34131	0	0	4.42258	4.15096	5.29182	1.18821	1.34372	0		700.098	0.704642	457.26	1381.75
RFC	1081.01		190.776	158.121	4.56901	32.655	0	0	0	3.99338	10.6908	0.580484	13.5513	0	8.30953	0	0.103299	0	0	0	0	57.3342	1.02266	14.6484	0.981327	0	4.89671	0.154184	3.41799	0	0	7.64996	4.51516	2.89205	1.13658	1.35075	0		697.16	0.704719	453.978	1388.55
RFC	1021.31		289.784	186.429	29.9509	103.355	0	0	0	0	13.2328	15.3564	40.5419	8.21505	38.0903	5.75854	7.66968	0	0.713164	0.625933	3.10727	63.1786	0.778108	13.95	1.03159	0	1.84749	0.188653	2.04904	0	0	5.24286	4.63119	4.50391	1.23508	1.36347	0		672.077	0.704719	461.489	1404.39
[truncated: 34 more columns]

## Sheet: Traces_1_Wallrock
		Ksm	Ksm	Ksm	Ksm	Ksm	Ksm	Ksm	Ksm	Ks-H2O	Ks-H2O	Ks-H2O	Ks-H2O	Ks-H2O	Ks-H2O	Ks-H2O	Ks-H2O	Isotope 1
Element	Inital conc	orthopyroxene {1}	clinopyroxene {1}	feldspar {1}	feldspar {2}	quartz {1}	spinel {1}	rhm-oxide {1}	apatite {1}	orthopyroxene {1}	clinopyroxene {1}	feldspar {1}	feldspar {2}	quartz {1}	spinel {1}	rhm-oxide {1}	apatite {1}
Sr	1101	0.0012/1130/0.124/740	1	3.2487/1130/6.815/740	0.77	0	0.0006/1130/0.2935/740	0.7/1130/0.552/740	2	1000	1	1000	1000	1000	1000	1000	1000	0.716
Zr	213	0.032/1130/0.0805/740	1	0.04/1130/0.14/740	0.0435	0	0.015/1130/0.137/740	0.33/1130/0.935/740	0.01	1000	1	1000	1000	1000	1000	1000	1000
Ba	1098	0.005/1130/0.0735/740	1	0.459/1130/0.375/740	3.77	0	0.0005/1130/0.1/740	0.09	0.01	1000	1	1000	1000	1000	1000	1000	1000
RunSummary!C	RunSummary!D	RunSummary!E	RunSummary!G	RunSummary!H	RunSummary!I	RunSummary!J	RunSummary!K	RunSummary!L	RunSummary!M	RunSummary!S	RunSummary!T	RunSummary!U	RunSummary!V	RunSummary!W	RunSummary!X	RunSummary!Y	RunSummary!AR	RunSummary!AS	RunSummary!AT	RunSummary!AU	RunSummary!AV	RunSummary!AW	RunSummary!AX	RunSummary!AY	RunSummary!CG	RunSummary!CH	RunSummary!CI	RunSummary!CJ	RunSummary!CK	RunSummary!CL	RunSummary!CM	RunSummary!CN	RunSummary!CO	RunSummary!CP	RunSummary!CQ	RunSummary!CR	RunSummary!CS	RunSummary!CT	RunSummary!CU	RunSummary!CV		Traces_1_OUTPUT!AQW	Traces_1_OUTPUT!BFK	Traces_1_OUTPUT!BKG		Traces_1_OUTPUT!ARN	Traces_1_OUTPUT!BGB	Traces_1_OUTPUT!BKX
Magma Chamber Process	Magma Temperature (°C)	Wallrock Temperature (°C)	Total Magma Chamber Mass (grams )	Magma Liquid Mass (grams)	Magma: Total Incremental Mass of Crystals (Cumulates) removed as Cumulates (grams)	Magma: Total Cumulative Mass of Crystals (Cumulates) removed as Cumulates (grams)	Magma: Incremental Fluid Phase Mass	Magma: Cumulative Fluid Phase Mass	Magma: Mass Fraction of H2O in Incremental Fluid Phase	Wallrock Subsystem Mass (grams)	Wallrock Subsystem Residual Liquid Mass	Wallrock Subsystem Solid (Crystal) Mass	Wallrock Subsystem Residual Fluid Mass	Incremental WR Liquid Added to Magma (grams)	Cumulative WR LIquid Added to Magma (grams)	Wallrock: Mass Fraction of H2O in Incremental Fluid Phase	Wallrock Mineral Mass (grams): orthopyroxene {1}	Wallrock Mineral Mass (grams): clinopyroxene {1}	Wallrock Mineral Mass (grams): feldspar {1}	Wallrock Mineral Mass (grams): feldspar {2}	Wallrock Mineral Mass (grams): quartz {1}	Wallrock Mineral Mass (grams): spinel {1}	Wallrock Mineral Mass (grams): rhm-oxide {1}	Wallrock Mineral Mass (grams): apatite {1}	Wallrock Melt SiO2 (wt. %)	Wallrock Melt TiO2 (wt. %)	Wallrock Melt Al2O3 (wt. %)	Wallrock Melt Fe2O3 (wt. %)	Wallrock Melt Cr2O3 (wt. %)	Wallrock Melt FeO (wt. %)	Wallrock Melt MnO (wt. %)	Wallrock Melt MgO (wt. %)	Wallrock Melt NiO (wt. %)	Wallrock Melt CoO (wt. %)	Wallrock Melt CaO (wt. %)	Wallrock Melt Na2O (wt. %)	Wallrock Melt K2O (wt. %)	Wallrock Melt P2O5 (wt. %)	Wallrock Melt H2O (wt. %)	Wallrock Melt CO2 (wt. %)	> WR Melt, content >	Sr conc in WR melt that forms	Zr conc in WR melt that forms	Ba conc in WR melt that forms	> BULK WR Solids, content >	Sr conc in BULK WR solid	Zr conc in BULK WR solid	Ba conc in BULK WR solid	> WR Fuild, content >
AFC	1085	791.436	100.289	81.473	0.0730308	18.8162	0	0	0	199.711	19.9711	179.331	0.409066	0.289183	0.289183	1	10.7544	1.26569	81.0938	59.3516	24.6307	1.09518	0.921463	0.217983	74.5716	0.292675	9.18065	0.138303	0	0.583939	0.378069	0.264967	0	0	2.89754	2.32024	5.90172	1.03513	2.43516	0		400.697	1230.79	791.426		1182.63	98.4992	1135.14
AFC	1058.92	792.359	109.402	86.4901	1.95979	22.9115	0	0	0	190.598	19.0598	171.323	0.215878	9.11237	9.40155	1	11.0562	0.451708	81.8625	54.3388	21.6111	1.1094	0.869789	0.0231969	74.6157	0.300684	9.24021	0.138393	0	0.573576	0.286639	0.268464	0	0	2.88543	2.29933	5.94032	1.02686	2.4244	0		395.983	1017.53	824.717		1219.5	79.2536	1144.84
AFC	1040.13	794.445	115.776	89.7229	1.20198	26.0535	0	0	0	184.224	18.4224	165.721	0.080179	6.37484	15.7764	1	11.2002	0	82.3109	50.8015	19.4604	1.11737	0.8307	0	74.9354	0.308596	9.40731	0.138042	0	0.575189	0.233393	0.27037	0	0	2.61477	2.2733	6.0023	0.828925	2.41238	0		394.127	879.868	850.67		1247.29	67.3039	1151.1
AFC	1075.92	798.224	194.906	161.41	0.84156	33.4965	0	0	0	180.094	18.0094	162.085	0	4.12965	19.906	0	11.1328	0	82.5164	48.4617	18.0568	1.1198	0.797072	0	75.0802	0.320604	9.70719	0.13687	0	0.585954	0.203577	0.272178	0	0	2.35244	2.19101	6.09061	0.689766	2.36955	0		395.227	792.123	868.44		1266.09	60.6232	1154.99
AFC	1069.15	806.651	196.369	160.781	0.282628	35.5889	0	0	0	178.631	17.8631	160.767	0	1.46345	21.3695	0	11.105	0	82.4523	47.7284	17.5837	1.12927	0.768769	0	75.1192	0.348043	9.87343	0.140817	0	0.620543	0.19401	0.277559	0	0	2.2857	2.16478	6.12512	0.642758	2.20807	0		402.416	769.14	873.418		1272.36	57.3932	1156.74
AFC	1062.49	814.687	197.805	160.249	0.251117	37.5556	0	0	0	177.195	17.7195	159.476	0	1.43509	22.8046	0	11.077	0	82.4262	46.9712	17.1226	1.13905	0.739746	0	75.1446	0.375846	10.0303	0.144732	0	0.655335	0.185195	0.282975	0	0	2.2254	2.14131	6.15564	0.599417	2.05918	0		409.078	746.133	878.892		1278.6	54.3922	1158.38
AFC	1055.82	822.893	199.321	159.897	0.238851	39.4242	0	0	0	175.679	17.5679	158.111	0	1.51619	24.3208	0	11.0466	0	82.4419	46.1269	16.6382	1.14985	0.707806	0	75.1594	0.405966	10.1891	0.148887	0	0.692749	0.176449	0.288801	0	0	2.16687	2.11882	6.18449	0.556557	1.91194	0		415.645	721.475	885.392		1285.32	51.3984	1160.01
AFC	1048.92	832.536	201.192	158.164	0.325844	43.0285	0	0	0	173.808	17.3808	156.427	0	1.8713	26.1921	0	11.0081	0	82.528	45.0169	16.0437	1.16368	0.666768	0	75.1629	0.443709	10.3738	0.153985	0	0.739241	0.166421	0.29604	0	0	2.10162	2.09418	6.21555	0.50787	1.74469	0		422.989	690.831	894.558		1293.78	47.9556	1161.84
AFC	1042.08	842.201	203.167	156.512	0.290458	46.6544	0	0	0	171.833	17.1833	154.65	0	1.97464	28.1667	0	10.9664	0	82.7049	43.7583	15.4199	1.17888	0.621601	0	75.1519	0.484227	10.5571	0.159342	0	0.788694	0.156582	0.303736	0	0	2.03973	2.07131	6.24372	0.460758	1.58284	0		429.863	658.402	905.781		1302.93	44.5852	1163.52
AFC	1035.19	852.014	205.296	155.128	0.314126	50.1679	0	0	0	169.704	16.9704	152.734	0	2.1291	30.2958	0	10.9201	0	83.0046	42.2915	14.7507	1.19583	0.570989	0	75.1266	0.528279	10.7415	0.16505	0	0.841944	0.146719	0.312023	0	0	1.98009	2.04989	6.26937	0.414531	1.42404	0		436.215	623.622	919.958		1313.09	41.2334	1164.98
AFC	1028.34	862.216	207.676	153.478	0.32416	54.1974	0	0	0	167.324	16.7324	150.592	0	2.37997	32.6758	0	10.867	0	83.4873	40.5035	14.0063	1.21524	0.512395	0	75.0856	0.577377	10.9313	0.171296	0	0.900685	0.136494	0.321173	0	0	1.92104	2.02951	6.29295	0.368074	1.26444	0		441.949	585.332	938.835		1324.83	37.8093	1166.07
AFC	1021.43	872.766	210.359	152.034	0.324624	58.3247	0	0	0	164.641	16.4641	148.177	0	2.6832	35.359	0	10.8059	0	84.2409	38.2778	13.1706	1.23745	0.444206	0	75.0282	0.631883	11.1258	0.178116	0	0.965175	0.125823	0.331242	0	0	1.86269	2.01048	6.31403	0.321652	1.10497	0		446.632	543.285	964.827		1338.62	34.3195	1166.41
AFC	1014.65	882.997	213.223	150.94	0.37459	62.2835	0	0	0	161.777	16.1777	145.599	0	2.86411	38.2231	0	10.7393	0	85.3278	35.6195	12.2819	1.26133	0.369374	0	74.9583	0.688595	11.3125	0.185115	0	1.03149	0.115238	0.341644	0	0	1.80825	1.99409	6.33121	0.27811	0.95539	0		449.512	499.977	999.705		1354.03	30.9726	1165.42
AFC	1007.98	893.022	216.358	150.029	0.439576	66.3296	0	0	0	158.642	15.8642	142.777	0	3.13524	41.3583	0	10.6652	0	86.9128	32.3146	11.312	1.28727	0.285682	0	74.8771	0.748028	11.4937	0.192382	0	1.10016	0.104463	0.352496	0	0	1.7564	1.98023	6.34475	0.236806	0.813499	0		450.036	454.822	1049.45		1371.84	27.7125	1162.07
AFC	1001.38	902.674	219.784	149.617	0.413949	70.1678	0	0	0	155.216	15.5216	139.694	0	3.42597	44.7843	0	10.5835	0	89.2276	28.1207	10.2546	1.31496	0.192803	0	74.7875	0.809049	11.6664	0.199815	0	1.16979	0.093502	0.363627	0	0	1.70724	1.9693	6.35444	0.19827	0.681117	0		447.29	408.443	1124.43		1392.56	24.5759	1154.39
AFC	1019.8	911.964	293.604	189.816	0.433014	103.788	0	0	0	151.396	15.1396	136.256	0	3.81968	48.604	0	10.4919	0	92.7494	22.5046	9.07766	1.34456	0.0883187	0	74.6916	0.871423	11.8306	0.207441	0	1.24008	0.0821524	0.375055	0	0	1.65983	1.96164	6.36019	0.162319	0.557616	0		439.765	360.627	1251.18		1417.45	21.5442	1137.51
AFC	1012.96	923.138	299.15	190.888	0.538991	108.262	0	0	0	145.85	14.585	131.265	0	5.54639	54.1504	0	10.3901	0	100.517	11.6935	7.35386	1.31043	0	0	74.6069	0.904522	12.0135	0.224277	0	1.33457	0.0653843	0.3885	0	0	1.60184	1.96697	6.35206	0.122071	0.41935	0		419.124	299.494	1629.79		1457.8	18.0252	1075.12
AFC	1006.27	934.594	305.651	193.064	0.524936	112.588	0	0	0	139.349	13.9349	125.414	0	6.50104	60.6514	0	10.3	0	108.647	0	5.30926	1.15706	0	0	74.6155	0.846932	12.1496	0.25908	0	1.45082	0.0466643	0.402838	0	0	1.53622	2.02116	6.2847	0.0871211	0.299287	0		399.671	239.68	2475.3		1509.43	14.6404	911.472
AFC	999.839	945.602	312.877	196.102	0.498969	116.775	0	0	0	132.123	13.2123	118.91	0	7.22585	67.8773	0	10.1559	0	104.711	0	3.03982	1.00351	0	0	74.6817	0.762942	12.2249	0.305016	0	1.57805	0.0318161	0.421586	0	0	1.462	2.13355	6.13503	0.0593998	0.204056	0		416.417	187.62	2283.04		1567.24	11.2809	858.991
AFC	993.706	956.168	321.868	201.026	0.465328	120.842	0	0	0	123.132	12.3132	110.819	0	8.99091	76.8682	0	9.92864	0	99.8328	0	0.221711	0.835513	0	0	74.7822	0.646578	12.2725	0.365886	0	1.70899	0.0197315	0.44476	0	0	1.38552	2.28082	5.92965	0.0368383	0.126551	0		435.918	136.832	2061.85		1647.52	8.16851	797.532
AFC	988.627	974.094	323.94	199.476	0.0669561	124.464	0	0	0	121.06	12.106	108.954	0	2.07158	78.9398	0	9.7939	0	98.3725	0	0	0.787823	0	0	73.7091	0.61807	12.6916	0.411107	0	2.04389	0.0171368	0.496277	0	0	1.38599	2.55231	5.93256	0.0319939	0.109909	0		453.48	127.138	2004.57		1665.97	7.22823	783.35
[truncated: 14 more columns]

## Sheet: Traces_1_OUTPUT
	MODE	Magma Temperature (°C)	Wallrock Temperature (°C)	Recharge Magma Temperature (°C) (T of recharge magma when recharge event occurs)	Total Magma Chamber Mass (grams )	Magma Liquid Mass (grams)	Magma: Total Incremental Mass of Crystals (Cumulates) removed as Cumulates (grams)	Magma: Total Cumulative Mass of Crystals (Cumulates) removed as Cumulates (grams)	Magma: Incremental Fluid Phase Mass	Magma: Cumulative Fluid Phase Mass	Magma: Mass Fraction of H2O in Incremental Fluid Phase	Total Recharge Magma Mass Added to Magma (grams)	Recharge Liquid Mass (grams)	Recharge Magma Total Mass of Crystals (grams)	Total Recharge Magma Fluid Phase Mass (grams)	Recharge: Mass Fraction of H2O in Incremental Fluid Phase	Wallrock Subsystem Mass (grams)	Wallrock Subsystem Residual Liquid Mass	Wallrock Subsystem Solid (Crystal) Mass	Wallrock Subsystem Residual Fluid Mass	Incremental WR Liquid Added to Magma (grams)	Cumulative WR LIquid Added to Magma (grams)	Wallrock: Mass Fraction of H2O in Incremental Fluid Phase	Magma Melt SiO2 (wt. %)	Magma Melt TiO2 (wt. %)	Magma Melt Al2O3 (wt. %)	Magma Melt Fe2O3 (wt. %)	Magma Melt Cr2O3 (wt. %)	Magma Melt FeO (wt. %)	Magma Melt MnO (wt. %)	Magma Melt MgO (wt. %)	Magma Melt NiO (wt. %)	Magma Melt CoO (wt. %)	Magma Melt CaO (wt. %)	Magma Melt Na2O (wt. %)	Magma Melt K2O (wt. %)	Magma Melt P2O5 (wt. %)	Magma Melt H2O (wt. %)	Magma Melt CO2 (wt. %)	Nd conc in melt, magma chamber	Nd conc in inst olivine {1}	Nd conc in inst clinopyroxene {1}	Nd conc in inst feldspar {1}	Nd conc in inst spinel {1}	Nd conc in inst apatite {1}	Nd conc in inst orthopyroxene {1}
Initial		1195.7				100											200																							0
Step 1	FC	1195.7	700.025		100	99.9868	0.0131792	0.0131792																53.8238	0.972083	14.2066	1.06322		6.02301	0.141724	6.73788			8.91071	4.09085	2.08593	0.941706	1.00246		0	0
Step 2	FC	1190.7	703.786		100	99.6061	0.380701	0.39388																53.8771	0.975799	14.2609	1.06728		5.9907	0.141141	6.59183			8.94329	4.10649	2.0939	0.945305	1.00629		0	0
Step 3	FC	1185.7	707.524		100	99.233	0.373109	0.766989																53.9298	0.979467	14.3145	1.07129		5.95804	0.140552	6.44824			8.97544	4.12193	2.10177	0.948859	1.01008		0	0
Step 4	FC	1180.7	711.241		100	98.8673	0.365707	1.1327																53.982	0.98309	14.3675	1.07526		5.92503	0.139955	6.30708			9.00718	4.13717	2.10955	0.952369	1.01381		0	0
Step 5	FC	1175.7	714.936		100	98.5088	0.35849	1.49119																54.0338	0.986668	14.4197	1.07917		5.89168	0.139352	6.16833			9.03851	4.15223	2.11723	0.955835	1.0175		0	0
Step 6	FC	1170.7	718.61		100	98.1574	0.351452	1.84264																54.085	0.990201	14.4714	1.08303		5.858	0.138742	6.03195			9.06944	4.1671	2.12481	0.959257	1.02114		0	0
Step 7	FC	1165.7	722.263		100	97.8128	0.344591	2.18723																54.1357	0.993689	14.5224	1.08685		5.82398	0.138126	5.89793			9.09996	4.18178	2.13229	0.962637	1.02474		0	0
Step 8	FC	1160.7	725.897		100	97.4749	0.337901	2.52513																54.1859	0.997134	14.5727	1.09062		5.78963	0.137503	5.76622			9.13008	4.19627	2.13968	0.965974	1.02829		0	0
Step 9	FC	1155.7	729.512		100	97.1435	0.331379	2.85651																54.2356	1.00054	14.6224	1.09434		5.75495	0.136874	5.63681			9.15982	4.21059	2.14698	0.969269	1.0318		0	0
Step 10	FC	1150.7	733.107		100	96.8185	0.325021	3.18153																54.2849	1.00389	14.6715	1.09801		5.71995	0.136239	5.50965			9.18917	4.22472	2.15419	0.972523	1.03527		0	0
Step 11	FC	1145.7	736.685		100	96.4996	0.318822	3.50035																54.3337	1.00721	14.72	1.10164		5.68463	0.135597	5.38473			9.21813	4.23868	2.16131	0.975736	1.03869		0	0
Step 12	FC	1140.7	740.245		100	96.1869	0.31278	3.81313																54.382	1.01049	14.7678	1.10522		5.64899	0.13495	5.26201			9.24673	4.25246	2.16834	0.978909	1.04206		0	0
Step 13	FC	1135.7	743.787		100	95.88	0.306891	4.12002																54.4299	1.01372	14.8151	1.10876		5.61303	0.134296	5.14147			9.27495	4.26607	2.17528	0.982042	1.0454		0	0
Step 14	FC	1130.7	747.313		100	95.5788	0.301151	4.42117																54.4773	1.01691	14.8618	1.11225		5.57676	0.133636	5.02307			9.30281	4.27952	2.18213	0.985136	1.04869		0	0
Step 15	FC	1125.7	750.823		100	95.2833	0.295558	4.71673																54.5243	1.02007	14.9079	1.1157		5.54017	0.132971	4.90679			9.33031	4.29279	2.1889	0.988192	1.05195		0	0
Step 16	FC	1120.7	755.494		100	94.3096	0.973713	5.69045																54.5804	1.02501	15.0233	1.10988		5.52584	0.133797	4.75432			9.23953	4.33519	2.2115	0.998395	1.06281		0	0	0
Step 17	FC	1115.7	761.164		100	92.7459	1.56363	7.25408																54.6473	1.03084	15.2008	1.09485		5.53145	0.13604	4.57035			9.03915	4.40448	2.24878	1.01523	1.08073		0	0	0
Step 18	FC	1110.7	766.674		100	91.2636	1.48235	8.73643																54.7154	1.03578	15.3726	1.07959		5.53503	0.138236	4.3925			8.84335	4.47224	2.28531	1.03172	1.09828		0	0	0
Step 19	FC	1105.7	772.036		100	89.8568	1.40678	10.1432																54.7847	1.03984	15.5388	1.06411		5.53662	0.140386	4.22056			8.65208	4.53849	2.32109	1.04787	1.11547		0	0	0
Step 20	FC	1100.7	777.27		100	88.5115	1.34531	11.4885																54.8557	1.04314	15.698	1.04863		5.53656	0.142494	4.05429			8.46528	4.60334	2.35635	1.0638	1.13243		0	0	0	0
Step 21	FC	1095.7	783.921		100	85.9391	2.57238	14.0609																55.0196	1.06567	15.6025	1.05903		5.57425	0.145198	3.88592			8.28366	4.67818	2.42402	1.09564	1.16632		0	0	0	0
Step 22	FC	1090.7	790		100	83.5262	2.4129	16.4738																55.1804	1.08772	15.5047	1.0695		5.60858	0.147793	3.72373			8.10908	4.75005	2.49113	1.12729	1.20002		0	0	0	0
Step 23	AFC		789.908
Step 24	FC	1085.7	789.908		100	81.2568	2.26939	18.7432																55.3384	1.10932	15.4045	1.08006		5.63963	0.150277	3.56745			7.9413	4.81903	2.55772	1.15877	1.23353		0	0	0	0
Step 25	AFC		791.436
Step 26	AFC		791.436														199.711	19.9711	179.331	0.409066	0.289183	0.289183	1
Step 27	AFC	1085	791.436		100.289	81.473	0.0730308	18.8162									199.711	19.9711	179.331	0.409066		0.289183	1	55.4122	1.10662	15.3903	1.07595		5.62089	0.151194	3.54535			7.91337	4.81401	2.57186	1.15937	1.2389
Step 28	FC	1080	791.436		100.289	79.3375	2.13546	20.9517																55.568	1.12768	15.2876	1.08652		5.64783	0.153565	3.39558			7.7531	4.87936	2.63802	1.19058	1.27225
Step 29	AFC		792.359
Step 30	AFC		792.359														190.598	19.0598	171.323	0.215878	9.11237	9.40155	1
Step 31	AFC	1058.92	792.359		109.402	86.4901	1.95979	22.9115									190.598	19.0598	171.323	0.215878		9.40155	1	57.7109	1.04702	14.8362	0.967671		5.07977	0.170319	2.82177			6.99654	4.70186	3.04514	1.20031	1.42247
Step 32	FC	1053.92	792.359		109.402	84.55	1.94003	24.8515																57.8766	1.06506	14.7224	0.976705		5.08205	0.172278	2.70051			6.86777	4.7423	3.11138	1.22785	1.4551
Step 33	AFC		794.445
Step 34	AFC		794.445														184.224	18.4224	165.721	0.080179	6.37484	15.7764	1
Step 35	AFC	1040.13	794.445		115.776	89.7229	1.20198	26.0535									184.224	18.4224	165.721	0.080179		15.7764	1	59.1945	1.01577	14.4166	0.907387		4.73328	0.178336	2.39517			6.42889	4.61381	3.35767	1.21595	1.54261
Step 36	FC	1035.13	794.445		115.776	87.6904	2.03249	28.086																59.4406	1.01751	14.2917	0.873185		4.6852	0.180181	2.28686			6.32636	4.64479	3.43106	1.24414	1.57837
Step 37	RFC			1130		162.69						75	71.5717	3.4283
Step 38	RFC	1081.01	794.445		190.776	158.121	4.56901	32.655																57.3342	1.02266	14.6484	0.981327		4.89671	0.154184	3.41799			7.64996	4.51516	2.89205	1.13658	1.35075
Step 39	AFC		798.224
Step 40	AFC		798.224														180.094	18.0094	162.085		4.12965	19.906
Step 41	AFC	1075.92	798.224		194.906	161.41	0.84156	33.4965									180.094	18.0094	162.085			19.906		57.8243	1.00608	14.5767	0.954072		4.77812	0.156224	3.27391			7.44876	4.47793	2.98897	1.13107	1.38386
Step 42	FC	1070.92	798.224		194.906	159.6	1.80971	35.3062																57.9085	1.00826	14.6932	0.940772		4.7592	0.158	3.13868			7.30137	4.52572	3.02286	1.1439	1.39955
Step 43	AFC		806.651
Step 44	AFC		806.651														178.631	17.8631	160.767		1.46345	21.3695
Step 45	AFC	1069.15	806.651		196.369	160.781	0.282628	35.5889									178.631	17.8631	160.767			21.3695		58.0783	1.0026	14.6677	0.931413		4.71842	0.158606	3.0914			7.23273	4.51173	3.05641	1.14135	1.40937
Step 46	FC	1064.15	806.651		196.369	159.065	1.71559	37.3045																58.1629	1.00413	14.7785	0.918127		4.69757	0.160317	2.96238			7.09103	4.55745	3.08938	1.15366	1.42457
Step 47	AFC		814.687
Step 48	AFC		814.687														177.195	17.7195	159.476		1.43509	22.8046
Step 49	AFC	1062.49	814.687		197.805	160.249	0.251117	37.5556									177.195	17.7195	159.476			22.8046		58.3274	0.998743	14.7523	0.909255		4.6582	0.160791	2.91944			7.02673	4.54253	3.12168	1.1505	1.43248
Step 50	FC	1057.49	814.687		197.805	158.619	1.62979	39.1854																58.4121	0.999671	14.8578	0.895976		4.63576	0.162443	2.79653			6.8902	4.5863	3.15375	1.16232	1.4472
Step 51	AFC		822.893
Step 52	AFC		822.893														175.679	17.5679	158.111		1.51619	24.3208
Step 53	AFC	1055.82	822.893		199.321	159.897	0.238851	39.4242									175.679	17.5679	158.111			24.3208		58.5833	0.99419	14.829	0.886948		4.59496	0.162818	2.75469			6.82544	4.56933	3.1872	1.15832	1.45377
Step 54	FC	1050.82	822.893		199.321	156.618	3.27848	42.7027																58.7387	1.00878	14.7362	0.890808		4.60202	0.165113	2.65242			6.68414	4.60447	3.25061	1.18256	1.4842
Step 55	AFC		832.536
Step 56	AFC		832.536														173.808	17.3808	156.427		1.8713	26.1921
Step 57	AFC	1048.92	832.536		201.192	158.164	0.325844	43.0285									173.808	17.3808	156.427			26.1921		58.9504	1.00294	14.6913	0.880988		4.55287	0.165378	2.60549			6.60998	4.58104	3.29223	1.17702	1.49034
Step 58	FC	1043.92	832.536		201.192	154.828	3.33539	46.3639																59.1215	1.01974	14.5754	0.888835		4.54659	0.167107	2.49497			6.49078	4.61108	3.35925	1.20237	1.52245
Step 59	AFC		842.201
Step 60	AFC		842.201														171.833	17.1833	154.65		1.97464	28.1667
Step 61	AFC	1042.08	842.201		203.167	156.512	0.290458	46.6544									171.833	17.1833	154.65			28.1667		59.34	1.01379	14.5294	0.878737		4.49562	0.167186	2.45056			6.41737	4.58437	3.4017	1.19525	1.52604
Step 62	FC	1037.08	842.201		203.167	153.313	3.19938	49.8538																59.5092	1.03035	14.4119	0.886645		4.48557	0.168774	2.34556			6.30504	4.61027	3.4686	1.22019	1.55788
Step 63	AFC		852.014
Step 64	AFC		852.014														169.704	16.9704	152.734		2.1291	30.2958
Step 65	AFC	1035.19	852.014		205.296	155.128	0.314126	50.1679									169.704	16.9704	152.734			30.2958		59.7417	1.02454	14.3622	0.876208		4.43173	0.168672	2.3012			6.22914	4.57998	3.51381	1.2116	1.5592
Step 66	FC	1030.19	852.014		205.296	151.423	3.70533	53.8732																60.0549	1.01479	14.2333	0.809833		4.35287	0.17055	2.19611			6.13006	4.60973	3.59478	1.23588	1.59713
Step 67	AFC		862.216
Step 68	AFC		862.216														167.324	16.7324	150.592		2.37997	32.6758
Step 69	AFC	1028.34	862.216		207.676	153.478	0.32416	54.1974									167.324	16.7324	150.592			32.6758		60.3193	1.00536	14.1799	0.789592		4.287	0.170224	2.15346			6.0553	4.57415	3.64389	1.22642	1.5954
Step 70	FC	1023.34	862.216		207.676	149.676	3.80272	58.0001																60.7063	0.995851	14.0658	0.727131		4.20547	0.172103	2.05126			5.90343	4.60516	3.73107	1.20285	1.63362
Step 71	AFC		872.766
Step 72	AFC		872.766														164.641	16.4641	148.177		2.6832	35.359
Step 73	AFC	1021.43	872.766		210.359	152.034	0.324624	58.3247									164.641	16.4641	148.177			35.359		60.9898	0.987076	14.0077	0.70843		4.13658	0.171468	2.00889			5.82387	4.5628	3.78422	1.19126	1.62783
Step 74	FC	1016.43	872.766		210.359	148.45	3.58421	61.9089																61.3545	0.977561	13.8897	0.652168		4.0552	0.173176	1.91465			5.68658	4.58712	3.86993	1.17416	1.6652
Step 75	AFC		882.997
Step 76	AFC		882.997														161.777	16.1777	145.599		2.86411	38.2231
Step 77	AFC	1014.65	882.997		213.223	150.94	0.37459	62.2835									161.777	16.1777	145.599			38.2231		61.6384	0.971041	13.8318	0.636768		3.98473	0.172515	1.86801			5.61258	4.54114	3.92568	1.16149	1.65592
Step 78	FC	1009.65	882.997		213.223	147.333	3.60648	65.89																61.9559	0.962651	13.7102	0.584035		3.91633	0.176738	1.77593			5.49798	4.56287	4.01559	1.14716	1.69465
Step 79	AFC		893.022
Step 80	AFC		893.022														158.642	15.8642	142.777		3.13524	41.3583
Step 81	AFC	1007.98	893.022		216.358	150.029	0.439576	66.3296									158.642	15.8642	142.777			41.3583		62.2537	0.958178	13.6568	0.571101		3.84035	0.175746	1.72163			5.41984	4.51309	4.07538	1.13291	1.68126
Step 82	FC	1002.98	893.022		216.358	146.605	3.42423	69.7538																62.5521	0.950413	13.52	0.524234		3.77102	0.179851	1.63908			5.33128	4.52596	4.16386	1.12323	1.719
Step 83	AFC		902.674
Step 84	AFC		902.674														155.216	15.5216	139.694		3.42597	44.7843
Step 85	AFC	1001.38	902.674		219.784	149.617	0.413949	70.1678									155.216	15.5216	139.694			44.7843		62.8582	0.947474	13.4696	0.513154		3.69551	0.178371	1.58739			5.24805	4.47075	4.22486	1.10658	1.70005
Step 86	FC	996.381	902.674		219.784	146.38	3.23641	73.4042																63.1375	0.939704	13.3304	0.470785		3.6267	0.182315	1.51174			5.17256	4.47749	4.31126	1.10308	1.73645
Step 87	RFC			1080		216.38						70	36.2175	33.7825
Step 88	RFC	1021.31	902.674		289.784	186.429	29.9509	103.355																63.1786	0.778108	13.95	1.03159		1.84749	0.188653	2.04904			5.24286	4.63119	4.50391	1.23508	1.36347
Step 89	AFC		911.964
Step 90	AFC		911.964														151.396	15.1396	136.256		3.81968	48.604
Step 91	AFC	1019.8	911.964		293.604	189.816	0.433014	103.788									151.396	15.1396	136.256			48.604		63.4325	0.780868	13.8991	1.0105		1.82697	0.18694	1.99736			5.1688	4.57945	4.5508	1.21631	1.35037
Step 92	FC	1014.8	911.964		293.604	185.881	3.93488	107.723																63.6484	0.787224	13.7508	0.959514		1.78077	0.190897	1.92061			5.12417	4.57819	4.63842	1.24205	1.37895
Step 93	AFC		923.138
Step 94	AFC		923.138														145.85	14.585	131.265		5.54639	54.1504
Step 95	AFC	1012.96	923.138		299.15	190.888	0.538991	108.262									145.85	14.585	131.265			54.1504		63.9938	0.791865	13.6889	0.933641		1.75782	0.18779	1.85469			5.0192	4.50404	4.70029	1.21302	1.35496
Step 96	FC	1007.96	923.138		299.15	187.088	3.80077	112.063																64.2029	0.798183	13.5405	0.886235		1.71212	0.191605	1.78391			4.98076	4.49712	4.78655	1.23766	1.38249
Step 97	AFC		934.594
Step 98	AFC		934.594														139.349	13.9349	125.414		6.50104	60.6514
Step 99	AFC	1006.27	934.594		305.651	193.064	0.524936	112.588									139.349	13.9349	125.414			60.6514		64.5787	0.801215	13.4817	0.862091		1.69412	0.187245	1.71744			4.8619	4.41462	4.84892	1.20229	1.34978
Step 100	FC	1001.27	934.594		305.651	189.375	3.68855	116.276																64.7822	0.807355	13.3364	0.817909		1.64921	0.190892	1.65182			4.8259	4.40284	4.93367	1.2257	1.37607
Step 101	AFC		945.602
Step 102	AFC		945.602														132.123	13.2123	118.91		7.22585	67.8773
Step 103	AFC	999.839	945.602		312.877	196.102	0.498969	116.775									132.123	13.2123	118.91			67.8773		65.1698	0.807226	13.283	0.797381		1.63856	0.185516	1.58881			4.69902	4.31915	4.98933	1.18585	1.33638
Step 104	FC	994.839	945.602		312.877	192.501	3.60145	120.377																65.3683	0.813175	13.141	0.756137		1.59449	0.188987	1.52793			4.66537	4.30281	5.07244	1.20803	1.36138
Step 105	AFC		956.168
Step 106	AFC		956.168														123.132	12.3132	110.819		8.99091	76.8682
Step 107	AFC	993.706	956.168		321.868	201.026	0.465328	120.842									123.132	12.3132	110.819			76.8682		65.8089	0.807375	13.0902	0.738771		1.5927	0.181854	1.46344			4.51599	4.21163	5.12136	1.15845	1.30931
Step 108	FC	988.706	956.168		321.868	197.471	3.55501	124.397																66.0033	0.813105	12.9516	0.700204		1.54947	0.185128	1.40703			4.48454	4.19075	5.20268	1.1793	1.33288
Step 109	AFC		974.094
Step 110	AFC		974.094														121.06	12.106	108.954		2.07158	78.9398
Step 111	AFC	988.627	974.094		323.94	199.476	0.0669561	124.464									121.06	12.106	108.954			78.9398		66.0865	0.8113	12.9474	0.697089		1.55339	0.183446	1.39503			4.45202	4.17363	5.21184	1.16778	1.32062
Step 112	FC	983.627	974.094		323.94	196.047	3.42873	127.893																66.2755	0.81683	12.8111	0.660473		1.51083	0.186654	1.34131			4.42258	4.15096	5.29182	1.18821	1.34372
Step 113	AFC		991.684
Step 114	0
Step 115	0
Step 116	0
Step 117	0
Step 118	0
Step 119	0
Step 120	0
Step 121	0
Step 122	0
Step 123	0
Step 124	0
Step 125	0
Step 126	0
Step 127	0
Step 128	0
Step 129	0
Step 130	0
Step 131	0
Step 132	0
Step 133	0
Step 134	0
Step 135	0
Step 136	0
Step 137	0
Step 138	0
Step 139	0
Step 140	0
Step 141	0
Step 142	0
Step 143	0
Step 144	0
Step 145	0
Step 146	0
Step 147	0
Step 148	0
Step 149	0
Step 150	0
Step 151	0
Step 152	0
Step 153	0
Step 154	0
Step 155	0
Step 156	0
Step 157	0
Step 158	0
Step 159	0
Step 160	0
Step 161	0
Step 162	0
Step 163	0
Step 164	0
Step 165	0
Step 166	0
Step 167	0
Step 168	0
Step 169	0
Step 170	0
Step 171	0
Step 172	0
Step 173	0
Step 174	0
Step 175	0
Step 176	0
Step 177	0
Step 178	0
Step 179	0
Step 180	0
Step 181	0
Step 182	0
Step 183	0
Step 184	0
Step 185	0
Step 186	0
Step 187	0
Step 188	0
Step 189	0
Step 190	0
Step 191	0
Step 192	0
Step 193	0
Step 194	0
Step 195	0
Step 196	0
Step 197	0
Step 198	0
Step 199	0
Step 200	0
Step 201	0
Step 202	0
Step 203	0
Step 204	0
Step 205	0
Step 206	0
Step 207	0
Step 208	0
Step 209	0
Step 210	0
Step 211	0
Step 212	0
Step 213	0
Step 214	0
Step 215	0
Step 216	0
Step 217	0
Step 218	0
Step 219	0
Step 220	0
Step 221	0
Step 222	0
Step 223	0
Step 224	0
Step 225	0
Step 226	0
Step 227	0
Step 228	0
Step 229	0
Step 230	0
Step 231	0
Step 232	0
Step 233	0
Step 234	0
Step 235	0
Step 236	0
Step 237	0
Step 238	0
Step 239	0
Step 240	0
Step 241	0
Step 242	0
Step 243	0
Step 244	0
Step 245	0
Step 246	0
Step 247	0
Step 248	0
Step 249	0
Step 250	0
Step 251	0
Step 252	0
Step 253	0
Step 254	0
Step 255	0
Step 256	0
Step 257	0
Step 258	0
Step 259	0
Step 260	0
Step 261	0
Step 262	0
Step 263	0
Step 264	0
Step 265	0
Step 266	0
Step 267	0
Step 268	0
Step 269	0
Step 270	0
Step 271	0
Step 272	0
Step 273	0
Step 274	0
Step 275	0
Step 276	0
Step 277	0
Step 278	0
Step 279	0
Step 280	0
Step 281	0
Step 282	0
Step 283	0
Step 284	0
Step 285	0
Step 286	0
Step 287	0
Step 288	0
Step 289	0
Step 290	0
Step 291	0
Step 292	0
Step 293	0
Step 294	0
Step 295	0
Step 296	0
Step 297	0
Step 298	0
Step 299	0
Step 300	0
Step 301	0
Step 302	0
Step 303	0
Step 304	0
Step 305	0
Step 306	0
Step 307	0
Step 308	0
Step 309	0
Step 310	0
Step 311	0
Step 312	0
Step 313	0
Step 314	0
Step 315	0
Step 316	0
Step 317	0
Step 318	0
Step 319	0
Step 320	0
Step 321	0
Step 322	0
Step 323	0
Step 324	0
Step 325	0
Step 326	0
Step 327	0
Step 328	0
Step 329	0
Step 330	0
Step 331	0
Step 332	0
Step 333	0
Step 334	0
Step 335	0
Step 336	0
Step 337	0
Step 338	0
Step 339	0
Step 340	0
Step 341	0
Step 342	0
Step 343	0
Step 344	0
Step 345	0
Step 346	0
Step 347	0
Step 348	0
Step 349	0
Step 350	0
Step 351	0
Step 352	0
Step 353	0
Step 354	0
Step 355	0
Step 356	0
Step 357	0
Step 358	0
Step 359	0
Step 360	0
Step 361	0
Step 362	0
Step 363	0
Step 364	0
Step 365	0
Step 366	0
Step 367	0
Step 368	0
Step 369	0
Step 370	0
Step 371	0
Step 372	0
Step 373	0
Step 374	0
Step 375	0
Step 376	0
Step 377	0
Step 378	0
Step 379	0
Step 380	0
Step 381	0
Step 382	0
Step 383	0
Step 384	0
Step 385	0
Step 386	0
Step 387	0
Step 388	0
Step 389	0
Step 390	0
Step 391	0
Step 392	0
Step 393	0
Step 394	0
Step 395	0
Step 396	0
Step 397	0
Step 398	0
Step 399	0

## Sheet: Input
EXECUTABLES	MCS_PhaseEQ_PC.xlsm
Melts Executable Family	rhyolite-MELTS+H2O-CO2 fluid (v1.2.0); Melts-batch-v1.2.0;
Magma EXE Release	rhyolite-MELTS (1.0.2, 1.1.0, 1.2.0) pMELTS (5.6.1) - (Feb 25 2020 - 15:59:34)
Wallrock EXE Release	rhyolite-MELTS (1.0.2, 1.1.0, 1.2.0) pMELTS (5.6.1) - (Feb 25 2020 - 15:59:34)
Recharge EXE Release	rhyolite-MELTS (1.0.2, 1.1.0, 1.2.0) pMELTS (5.6.1) - (Feb 25 2020 - 15:59:34)
SYSTEM VARIABLES	Values in column B, and the 'do not edit' names in column D, must be kept matched on a single row.	Copied from C:\MCS_PC\INPUT & OUTPUT\MES_R2AFC_input.xlsx on the creation of this Archive, at 3/15/2021 7:55:22 PM			Input values reprinted with (memory) variable values as MCS starts.
FmZero (wallrock) (fraction)	0.1		FmZero		Minimum Wallrock (WR)melt mass fraction to trigger addition of anatectic melt from WR to M (Magma) subsystem. Final state of WR after addition will be WR melt fraction equal to fmzero. Based on rheological studies, fmzero may typically lie in range 0.01 to 0.15. fmzero=0.05 is a 'nice' value.
Excluded Phases			ExclusionsGlobal		Using the MCS interface, click "Help for Excluded Phase", click on phases you wish to exclude, press put in clipboard, and paste in this row (col. B). The phases excluded will be excluded in all three subsystems WR, M and R.
System Pressure (in bars)	400		SystemPressure		Pressure in bars. This is a global parameter that is constant and applies to M, WR and R subsystems.
Enthalpy Convergence steps	30		EnthConvergenceSteps		During Assimilation (A) and Recharge R steps in a MCS simulation, thermodynamic isenthalpic calculations are performed. During this calculation, the system enthalpy, rather than tempertureis being stepped from an initial to final state. The value enthered here in EnthConvergenceSteps controls the discretization. This value should be a positive nonzero interger. A operation range is circa 5-100. A…
Oxygen Fugacity	none		SystemfO2		Acceptable input values are: none, fmq, coh, nno, iw, hm. These are standard oxygen buffers. When choosing 'none' be sure to input reasonable values for ferric iron oxide and ferrous iron oxide into all compositions used as input. For many applications setting 'none' and then making ferrous iron oxide 80 to 85% of the total iron oxide (FeOT) is suggested.
M Composition (wt%)					Oxide total should be normalized to sum to 100 prior to input for M and in the following sections for WR and Recharge R. User can either normalize to 100 on their own and then enter into column B or enter a composition in column F. The column F input is then auto normalized in column G. Then column G should be cut and pasted into column B (using paste special-->values)
SiO2	53.822		MagmaElementValue1			Composition Normalized to 100
TiO2	0.971955		MagmaElementValue2
Al2O3	14.2047		MagmaElementValue3
Fe2O3	1.06308		MagmaElementValue4
Cr2O3	0		MagmaElementValue5
FeO	6.0241		MagmaElementValue6
MnO	0.141743		MagmaElementValue7
MgO	6.74294		MagmaElementValue8
NiO	0		MagmaElementValue9
CoO	0		MagmaElementValue10
CaO	8.90959		MagmaElementValue11
Na2O	4.09031		MagmaElementValue12
K2O	2.08565		MagmaElementValue13
P2O5	0.941581		MagmaElementValue14
H2O	1.00233		MagmaElementValue15
CO2	0		MagmaElementValue16
SO3	100
Cl2O-1	n/a
F2O-1	n/a
Temperature start (°C)	1400		Tstart		Magma "Find Liquidus" operation begins at this Tstart. Once a liquidus temperature is established, the MCS simulation commences.
Temperature decrement (°C)	5		Tincrement		Positive number reflecting temperature decrement for the cooling magma body (M) . Numbers <1 are can be unstable and should not be explored. A 'nice' value is in the range 5-20 oC. For crude explorations 30-50 oCis good. Generally valuesin the range 2- 30 degree C are suggested
Hard Stop Melt Mass in Magma	0		MagmaHardStopMinimumLiqMass		Ignored if zero, otherwise MCS stops when the M liquid mass drops below this threshold.
Hard Stop Temperature	700		MagmaHardStopTemperature		Ignored if zero, otherwise MCS stopswhen the M temperature reaches this value. Useful especially if doing a M "fractional crystallization only" simulation. Otherwise keep at 0.
WR Composition (wt%)						Composition Normalized to 100
SiO2	68.0967		WallrockElementValue1
TiO2	0.312185		WallrockElementValue2
Al2O3	15.9315		WallrockElementValue3
Fe2O3	0.352467		WallrockElementValue4
Cr2O3	0		WallrockElementValue5
FeO	2.0141		WallrockElementValue6
MnO	0.0503525		WallrockElementValue7
MgO	1.09768		WallrockElementValue8
NiO	0		WallrockElementValue9
CoO	0		WallrockElementValue10
CaO	2.33635		WallrockElementValue11
Na2O	4.89426		WallrockElementValue12
K2O	4.31017		WallrockElementValue13
P2O5	0.151057		WallrockElementValue14
H2O	0.453172		WallrockElementValue15
CO2	0		WallrockElementValue16
SO3	n/a
Cl2O-1	n/a
F2O-1	n/a
INITIAL WALLROCK TEMPERATURE AND MASS
Wallrock find solidus: end temperature (°C)	700		WallrockPrelimTEnd		Ending temperature of the WR "Find Solidus" operation. This temperature should be set to ~10 degrees below the solidus of the WR composition. If set too low, the phase equilibria engine may not be able to return a solution. Try to keep this value slightly below but close to the solidus of Wallrock. Standalone MELTS calcultion done on WR composition in equilibrium crystallization mode can help use…
Wallrock find solidus: temperature (°C) decrement	5		WallrockPrelimTIncrement		Positive number reflecting temperature decrements for the WR "Find Solidus" operation.
Wallrock find solidus: start temperature (°C)	880		WallrockPrelimTStart		Starting temperature for WR Find Solidus operation.Find wallrock solidus operation does not need to start above the WR liquidus although choosing a too low value can interfere with a MCS simulation.
Initial Wallrock Solid Mass (grams)	200		WallrockSolidMass		All MCS simulations are hardwired to start with 100 grams of M magma. The number provided by user here sets the mass of WR that thermally interacts with M magma. So, e.g., if WR=100 in column B, then during MCS simulation, heat extracted from M is added to 100 grams of WR. If entry is 150, then the heat derived by cooling and crystallization of M will be added to 150 grams of WR etc.
Wallrock Initial Temperature (°C)	700		WallrockTemperature		Starting temperature of the WR upon initiation of the MCS
RECHARGE General
Recharge Trigger Mode (byTemp OR byTempSerial OR byDelta)	byTemp		RechargeTriggerMode		Acceptable values are: byTemp or byTempSerial or byDelta (case insensitive). When set byTemp, recharge addition occurs when the Magma T attains the value set here. When set byTempSerial, recharge addition N+1 will occur only after recharge addition N has completed, regardless of the threshold Magma T specified for recharge addition N+1. When set byDelta, recharge addition occurs when the Magma T …
RECHARGE EVENT 1 (wt. %)						Composition Normalized to 100
SiO2	53.822		Recharge1ElementValue1
TiO2	0.971955		Recharge1ElementValue2
Al2O3	14.2047		Recharge1ElementValue3
Fe2O3	1.06308		Recharge1ElementValue4
Cr2O3	0		Recharge1ElementValue5
FeO	6.0241		Recharge1ElementValue6
MnO	0.141743		Recharge1ElementValue7
MgO	6.74294		Recharge1ElementValue8
NiO	0		Recharge1ElementValue9
CoO	0		Recharge1ElementValue10
CaO	8.90959		Recharge1ElementValue11
Na2O	4.09031		Recharge1ElementValue12
K2O	2.08565		Recharge1ElementValue13
P2O5	0.941581		Recharge1ElementValue14
H2O	1.00233		Recharge1ElementValue15
CO2	0		Recharge1ElementValue16
SO3	n/a
Cl2O-1	n/a
F2O-1	n/a
RECHARGE EVENT 1: TEMPERATURES AND MASS
Recharge EVENT 1: Mass (grams)	75		Recharge1Mass		Value set here is the mass of Recharge added during Recharge event 1. Note that MCS ALWAYS begins with 100g of M magma. Hence if entry here >100 there will be proportionately more Recharge1 mass than starting Magma, and vice versa. If set to 0, no recharge will occur.
Recharge EVENT 1: R Magma Temperature (°C)	1130		Recharge1Temperature		The temperature of Recharge1's magma at the onset of recharge into the Magma. This is pre-addition T of the Recharge magma. The internal thermodynamic state of Recharge is computed before addition to M is available in Output (RunSummary)
Recharge EVENT 1: when byTemp or byTempSerial: Temp (°C) of M magma at recharge instant	1050		Recharge1TriggerTemperature		Temperature of Magma subsystem when Recharge magma will be added. Ignored when TriggerMode is set to byDelta.
Recharge EVENT 1: when byDelta: delta Temp (°C) of M magma at recharge instant	0		Recharge1DeltaTriggerTemperature		Temperature decrement (set as positive number) from Magma liquidus temperature at which the Recharge magma will be added. Ignored when TriggerMode is set to byTemp.
RECHARGE EVENT 2: OXIDES (wt. %)						Composition Normalized to 100
SiO2	54.5344		Recharge2ElementValue1
TiO2	0.858412		Recharge2ElementValue2
Al2O3	13.6841		Recharge2ElementValue3
Fe2O3	6.76631		Recharge2ElementValue4
Cr2O3	0		Recharge2ElementValue5
FeO	1.0099		Recharge2ElementValue6
MnO	0.121188		Recharge2ElementValue7
MgO	6.54413		Recharge2ElementValue8
NiO	0		Recharge2ElementValue9
CoO	0		Recharge2ElementValue10
CaO	8.70531		Recharge2ElementValue11
Na2O	3.75682		Recharge2ElementValue12
K2O	3.03979		Recharge2ElementValue13
P2O5	0.9796		Recharge2ElementValue14
H2O	0		Recharge2ElementValue15
CO2	0		Recharge2ElementValue16
SO3	n/a
Cl2O-1	n/a
F2O-1	n/a
RECHARGE EVENT 2: TEMPERATURES AND MASS
Recharge EVENT 2: Mass (grams)	70		Recharge2Mass		If >0 then Recharge2 will occur if conditions are met. If >100 there will be proportionately more Recharge2 mass than Magma, and vice versa. (SEE INFO on RECHARGE EVENT1 for details)
Recharge EVENT 2: R Magma Temperature (°C)	1080		Recharge2Temperature		The temperature at which Recharge2's magma body is equilibrated prior to addition to Magma (SEE INFO on RECHARGE EVENT1 for details)
Recharge EVENT 2: when byTemp or byTempSerial: Temp (°C) of M magma at recharge instant	1000		Recharge2TriggerTemperature		ignored when byDelta (SEE INFO on RECHARGE EVENT1 for details)
Recharge EVENT 2: when byDelta: delta Temp (°C) of M magma at recharge instant	0		Recharge2DeltaTriggerTemperature		ignored when byTemp (SEE INFO on RECHARGE EVENT1 for details)
RECHARGE EVENT 3: OXIDES (wt. %)						Composition Normalized to 100
SiO2	0		Recharge3ElementValue1
TiO2	0		Recharge3ElementValue2
Al2O3	0		Recharge3ElementValue3
Fe2O3	0		Recharge3ElementValue4
Cr2O3	0		Recharge3ElementValue5
FeO	0		Recharge3ElementValue6
MnO	0		Recharge3ElementValue7
MgO	0		Recharge3ElementValue8
NiO	0		Recharge3ElementValue9
CoO	0		Recharge3ElementValue10
CaO	0		Recharge3ElementValue11
Na2O	0		Recharge3ElementValue12
K2O	0		Recharge3ElementValue13
P2O5	0		Recharge3ElementValue14
H2O	0		Recharge3ElementValue15
CO2	0		Recharge3ElementValue16
SO3	n/a
Cl2O-1	n/a
F2O-1	n/a
RECHARGE EVENT 3: TEMPERATURES AND MASS
Recharge EVENT 3: Mass (grams)	0		Recharge3Mass		If >0 then Recharge3 will occur if conditions are met. If >100 there will be proportionately more Recharge3 mass than Magma, and vice versa. (SEE INFO on RECHARGE EVENT1 for details)
Recharge EVENT 3: R Magma Temperature (°C)	0		Recharge3Temperature		The temperature at which Recharge3's magma body is equilibrated prior to addition to Magma (SEE INFO on RECHARGE EVENT1 for details)
Recharge EVENT 3: when byTemp or byTempSerial: Temp (°C) of M magma at recharge instant	0		Recharge3TriggerTemperature		ignored when byDelta (SEE INFO on RECHARGE EVENT1 for details)
Recharge EVENT 3: when byDelta: delta Temp (°C) of M magma at recharge instant	0		Recharge3DeltaTriggerTemperature		ignored when byTemp (SEE INFO on RECHARGE EVENT1 for details)
RECHARGE EVENT 4: OXIDES (wt. %)						Composition Normalized to 100
SiO2	0		Recharge4ElementValue1
TiO2	0		Recharge4ElementValue2
Al2O3	0		Recharge4ElementValue3
Fe2O3	0		Recharge4ElementValue4
Cr2O3	0		Recharge4ElementValue5
FeO	0		Recharge4ElementValue6
MnO	0		Recharge4ElementValue7
MgO	0		Recharge4ElementValue8
NiO	0		Recharge4ElementValue9
CoO	0		Recharge4ElementValue10
CaO	0		Recharge4ElementValue11
Na2O	0		Recharge4ElementValue12
K2O	0		Recharge4ElementValue13
P2O5	0		Recharge4ElementValue14
H2O	0		Recharge4ElementValue15
CO2	0		Recharge4ElementValue16
SO3	n/a
Cl2O-1	n/a
F2O-1	n/a
Recharge EVENT 4: TEMPERATURES AND MASS
Recharge EVENT 4: Mass (grams)	0		Recharge4Mass		If >0 then Recharge4 will occur if conditions are met. If >100 there will be proportionately more Recharge4 mass than Magma, and vice versa. (SEE INFO on RECHARGE EVENT1 for details)
Recharge EVENT 4: R Magma Temperature (°C)	0		Recharge4Temperature		The temperature at which Recharge4's magma body is equilibrated prior to addition to Magma (SEE INFO on RECHARGE EVENT1 for details)
Recharge EVENT 4: when byTemp or byTempSerial: Temp (°C) of M magma at recharge instant	0		Recharge4TriggerTemperature		ignored when byDelta (SEE INFO on RECHARGE EVENT1 for details)
Recharge EVENT 4: when byDelta: delta Temp (°C) of M magma at recharge instant	0		Recharge4DeltaTriggerTemperature		ignored when byTemp (SEE INFO on RECHARGE EVENT1 for details)
RECHARGE EVENT 5: OXIDES (wt. %)						Composition Normalized to 100
SiO2	0		Recharge5ElementValue1
TiO2	0		Recharge5ElementValue2
Al2O3	0		Recharge5ElementValue3
Fe2O3	0		Recharge5ElementValue4
Cr2O3	0		Recharge5ElementValue5
FeO	0		Recharge5ElementValue6
MnO	0		Recharge5ElementValue7
MgO	0		Recharge5ElementValue8
NiO	0		Recharge5ElementValue9
CoO	0		Recharge5ElementValue10
CaO	0		Recharge5ElementValue11
Na2O	0		Recharge5ElementValue12
K2O	0		Recharge5ElementValue13
P2O5	0		Recharge5ElementValue14
H2O	0		Recharge5ElementValue15
CO2	0		Recharge5ElementValue16
SO3	n/a
Cl2O-1	n/a
F2O-1	n/a
RECHARGE EVENT 5: TEMPERATURES AND MASS
RECHARGE EVENT 5: Mass (grams)	0		Recharge5Mass		If >0 then Recharge5 will occur if conditions are met. If >100 there will be proportionately more Recharge5 mass than Magma, and vice versa. (SEE INFO on RECHARGE EVENT1 for details)
Recharge EVENT 5: R Magma Temperature (°C)	0		Recharge5Temperature		The temperature at which Recharge5's magma body is equilibrated prior to addition to Magma (SEE INFO on RECHARGE EVENT1 for details)
Recharge EVENT 5: when byTemp or byTempSerial: Temp (°C) of M magma at recharge instant	0		Recharge5TriggerTemperature		ignored when byDelta (SEE INFO on RECHARGE EVENT1 for details)
Recharge EVENT 5: when byDelta: delta Temp (°C) of M magma at recharge instant	0		Recharge5DeltaTriggerTemperature		ignored when byTemp (SEE INFO on RECHARGE EVENT1 for details)
GRAPHING
Graph 0 X axis	Wallrock/Temperature		Graph0XAxis		fixed by system for WR. Don't change.
Graph 0 Y axis	Wallrock/LiquidPercent		Graph0YAxis		fixed by system for WR. Don't change.
Graph 1 X axis	Magma/MgO		Graph1XAxis
Graph 1 Y axis	Magma/SiO2		Graph1YAxis		All X-Y pairs 1 thru 30 must say "Magma/" followed by one of the oxides (case sensitive) for both X and Y axes. Up to 30 graphs may be obtained. Only single oxides allowed. If you want a TAS diagram you must build your own. An easy way to do this is in CHARTDATA tab of RESULTS sheet with the user define file name.
Graph 2 X axis	Magma/MgO		Graph2XAxis
Graph 2 Y axis	Magma/TiO2		Graph2YAxis
Graph 3 X axis	Magma/MgO		Graph3XAxis
Graph 3 Y axis	Magma/Al2O3		Graph3YAxis
Graph 4 X axis	Magma/MgO		Graph4XAxis
Graph 4 Y axis	Magma/FeO		Graph4YAxis
Graph 5 X axis	Magma/MgO		Graph5XAxis
Graph 5 Y axis	Magma/Fe2O3		Graph5YAxis
Graph 6 X axis	Magma/MgO		Graph6XAxis
Graph 6 Y axis	Magma/MnO		Graph6YAxis
Graph 7 X axis	Magma/MgO		Graph7XAxis
Graph 7 Y axis	Magma/CaO		Graph7YAxis
Graph 8 X axis	Magma/MgO		Graph8XAxis
Graph 8 Y axis	Magma/Na2O		Graph8YAxis
Graph 9 X axis	Magma/MgO		Graph9XAxis
Graph 9 Y axis	Magma/K2O		Graph9YAxis
Graph 10 X axis	Magma/MgO		Graph10XAxis
Graph 10 Y axis	Magma/P2O5		Graph10YAxis
Graph 11 X axis			Graph11XAxis
Graph 11 Y axis			Graph11YAxis
Graph 12 X axis			Graph12XAxis
Graph 12 Y axis			Graph12YAxis
Graph 13 X axis			Graph13XAxis
Graph 13 Y axis			Graph13YAxis
Graph 14 X axis			Graph14XAxis
Graph 14 Y axis			Graph14YAxis
Graph 15 X axis			Graph15XAxis
Graph 15 Y axis			Graph15YAxis
Graph 16 X axis			Graph16XAxis
Graph 16 Y axis			Graph16YAxis
Graph 17 X axis			Graph17XAxis
Graph 17 Y axis			Graph17YAxis
Graph 18 X axis			Graph18XAxis
Graph 18 Y axis			Graph18YAxis
Graph 19 X axis			Graph19XAxis
Graph 19 Y axis			Graph19YAxis
Graph 20 X axis			Graph20XAxis
Graph 20 Y axis			Graph20YAxis
Graph 21 X axis			Graph21XAxis
Graph 21 Y axis			Graph21YAxis
Graph 22 X axis			Graph22XAxis
Graph 22 Y axis			Graph22YAxis
Graph 23 X axis			Graph23XAxis
Graph 23 Y axis			Graph23YAxis
Graph 24 X axis			Graph24XAxis
Graph 24 Y axis			Graph24YAxis
Graph 25 X axis			Graph25XAxis
Graph 25 Y axis			Graph25YAxis
Graph 26 X axis			Graph26XAxis
Graph 26 Y axis			Graph26YAxis
Graph 27 X axis			Graph27XAxis
Graph 27 Y axis			Graph27YAxis
Graph 28 X axis			Graph28XAxis
Graph 28 Y axis			Graph28YAxis
Graph 29 X axis			Graph29XAxis
Graph 29 Y axis			Graph29YAxis
Graph 30 X axis			Graph30XAxis
Graph 30 Y axis			Graph30YAxis
EXECUTABLES					The entries in the four cells immediately below are written back here at run time.
Melts Executable Family	Set at run time
Magma EXE Release	Read back from Melts
Wallrock EXE Release	Read back from Melts
Recharge EXE Release	Read back from Melts

## Sheet: RunSummary
	Melts Run Mode	Magma Chamber Process	Magma Temperature (°C)	Wallrock Temperature (°C)	Recharge Magma Temperature (°C) (T of recharge magma when recharge event occurs)	Total Magma Chamber Mass (grams )	Magma Liquid Mass (grams)	Magma: Total Incremental Mass of Crystals (Cumulates) removed as Cumulates (grams)	Magma: Total Cumulative Mass of Crystals (Cumulates) removed as Cumulates (grams)	Magma: Incremental Fluid Phase Mass	Magma: Cumulative Fluid Phase Mass	Magma: Mass Fraction of H2O in Incremental Fluid Phase	Total Recharge Magma Mass Added to Magma (grams)	Recharge Liquid Mass (grams)	Recharge Magma Total Mass of Crystals (grams)	Total Recharge Magma Fluid Phase Mass (grams)	Recharge: Mass Fraction of H2O in Incremental Fluid Phase	Wallrock Subsystem Mass (grams)	Wallrock Subsystem Residual Liquid Mass	Wallrock Subsystem Solid (Crystal) Mass	Wallrock Subsystem Residual Fluid Mass	Incremental WR Liquid Added to Magma (grams)	Cumulative WR LIquid Added to Magma (grams)	Wallrock: Mass Fraction of H2O in Incremental Fluid Phase	Magma Mineral olivine {1} : Incremental Mass (grams) Removed in this Temperature Step	Magma olivine {1} : Total Mass (grams) Removed across all Temperature Steps	Magma Mineral clinopyroxene {1} : Incremental Mass (grams) Removed in this Temperature Step	Magma clinopyroxene {1} : Total Mass (grams) Removed across all Temperature Steps	Magma Mineral feldspar {1} : Incremental Mass (grams) Removed in this Temperature Step	Magma feldspar {1} : Total Mass (grams) Removed across all Temperature Steps	Magma Mineral spinel {1} : Incremental Mass (grams) Removed in this Temperature Step	Magma spinel {1} : Total Mass (grams) Removed across all Temperature Steps	Magma Mineral apatite {1} : Incremental Mass (grams) Removed in this Temperature Step	Magma apatite {1} : Total Mass (grams) Removed across all Temperature Steps	Magma Mineral orthopyroxene {1} : Incremental Mass (grams) Removed in this Temperature Step	Magma orthopyroxene {1} : Total Mass (grams) Removed across all Temperature Steps	Recharge Magma olivine {1} : Mass (grams) Present when Recharge Magma Added to Magma	Recharge Magma orthopyroxene {1} : Mass (grams) Present when Recharge Magma Added to Magma	Recharge Magma clinopyroxene {1} : Mass (grams) Present when Recharge Magma Added to Magma	Recharge Magma feldspar {1} : Mass (grams) Present when Recharge Magma Added to Magma	Recharge Magma spinel {1} : Mass (grams) Present when Recharge Magma Added to Magma	Recharge Magma whitlockite {1} : Mass (grams) Present when Recharge Magma Added to Magma	Wallrock Mineral Mass (grams): orthopyroxene {1}	Wallrock Mineral Mass (grams): clinopyroxene {1}	Wallrock Mineral Mass (grams): feldspar {1}	Wallrock Mineral Mass (grams): feldspar {2}	Wallrock Mineral Mass (grams): quartz {1}	Wallrock Mineral Mass (grams): spinel {1}	Wallrock Mineral Mass (grams): rhm-oxide {1}
Numbers this row; System use only.																													0.00268649		0.00217432				0.00216368
9	WallrockPrimeSupra	WR THERMO		790														200	13.0469	186.374	0.579589			1																			10.4876	2.0061	80.438	63.7282	27.279	1.07365	0.971657
10	MagmaFindLiquidus	M LIQUIDUS T	1195.7	700		100	100		0	0	0
11	MagmaEquilibrateB	FC	1195.7	700.025		100	99.9868	0.0131792	0.0131792	0	0														0.0131792	0.0131792
13	MagmaEquilibrateB	FC	1190.7	703.786		100	99.6061	0.380701	0.39388	0	0														0.380701	0.39388
15	MagmaEquilibrateB	FC	1185.7	707.524		100	99.233	0.373109	0.766989	0	0														0.373109	0.766989
17	MagmaEquilibrateB	FC	1180.7	711.241		100	98.8673	0.365707	1.1327	0	0														0.365707	1.1327
19	MagmaEquilibrateB	FC	1175.7	714.936		100	98.5088	0.35849	1.49119	0	0														0.35849	1.49119
21	MagmaEquilibrateB	FC	1170.7	718.61		100	98.1574	0.351452	1.84264	0	0														0.351452	1.84264
23	MagmaEquilibrateB	FC	1165.7	722.263		100	97.8128	0.344591	2.18723	0	0														0.344591	2.18723
25	MagmaEquilibrateB	FC	1160.7	725.897		100	97.4749	0.337901	2.52513	0	0														0.337901	2.52513
27	MagmaEquilibrateB	FC	1155.7	729.512		100	97.1435	0.331379	2.85651	0	0														0.331379	2.85651
29	MagmaEquilibrateB	FC	1150.7	733.107		100	96.8185	0.325021	3.18153	0	0														0.325021	3.18153
31	MagmaEquilibrateB	FC	1145.7	736.685		100	96.4996	0.318822	3.50035	0	0														0.318822	3.50035
33	MagmaEquilibrateB	FC	1140.7	740.245		100	96.1869	0.31278	3.81313	0	0														0.31278	3.81313
35	MagmaEquilibrateB	FC	1135.7	743.787		100	95.88	0.306891	4.12002	0	0														0.306891	4.12002
37	MagmaEquilibrateB	FC	1130.7	747.313		100	95.5788	0.301151	4.42117	0	0														0.301151	4.42117
39	MagmaEquilibrateB	FC	1125.7	750.823		100	95.2833	0.295558	4.71673	0	0														0.295558	4.71673
41	MagmaEquilibrateB	FC	1120.7	755.494		100	94.3096	0.973713	5.69045	0	0														0.144209	4.86094	0.829504	0.829504
43	MagmaEquilibrateB	FC	1115.7	761.164		100	92.7459	1.56363	7.25408	0	0														0.00322189	4.86416	1.56041	2.38991
45	MagmaEquilibrateB	FC	1110.7	766.674		100	91.2636	1.48235	8.73643	0	0														0.0030777	4.86724	1.47927	3.86919
47	MagmaEquilibrateB	FC	1105.7	772.036		100	89.8568	1.40678	10.1432	0	0														0.0031474	4.87039	1.40363	5.27282
49	MagmaEquilibrateB	FC	1100.7	777.27		100	88.5115	1.34531	11.4885	0	0														0.00547417	4.87586	1.33019	6.60301	0.00964201	0.00964201
51	MagmaEquilibrateB	FC	1095.7	783.921		100	85.9391	2.57238	14.0609	0	0														0.3067	5.18256	0.839311	7.44232	1.42637	1.43601
53	MagmaEquilibrateB	FC	1090.7	790		100	83.5262	2.4129	16.4738	0	0														0.291643	5.4742	0.765543	8.20786	1.35572	2.79173
54	WallrockEquilibrate	AFC		789.908																																							10.4756	2.04018	80.4097	63.9245	27.3985	1.07232	0.974136
56	MagmaEquilibrateB	FC	1085.7	789.908		100	81.2568	2.26939	18.7432	0	0														0.278206	5.75241	0.699335	8.9072	1.29185	4.08358
57	WallrockEquilibrate	AFC		791.436																																							10.7544	1.26569	81.0938	59.3516	24.6307	1.09518	0.921463
59	WallrockChangeBulk	AFC		791.436														199.711	19.9711	179.331	0.409066	0.289183	0.289183	1																			10.7544	1.26569	81.0938	59.3516	24.6307	1.09518	0.921463
62	MagmaIsoTFractionateB	AFC	1085	791.436		100.289	81.473	0.0730308	18.8162	0	0														0.00450836	5.75692	0.0630684	8.97026	0.00545402	4.08904
64	MagmaEquilibrateB	FC	1080	791.436		100.289	79.3375	2.13546	20.9517	0	0														0.265716	6.02263	0.635275	9.60554	1.23447	5.32351
65	WallrockEquilibrate	AFC		792.359																																							11.0562	0.451708	81.8625	54.3388	21.6111	1.1094	0.869789
67	WallrockChangeBulk	AFC		792.359														190.598	19.0598	171.323	0.215878	9.11237	9.40155	1																			11.0562	0.451708	81.8625	54.3388	21.6111	1.1094	0.869789
70	MagmaIsoTFractionateB	AFC	1058.92	792.359		109.402	86.4901	1.95979	22.9115	0	0														0.10054	6.12317	1.65165	11.2572	0.207602	5.53111
72	MagmaEquilibrateB	FC	1053.92	792.359		109.402	84.55	1.94003	24.8515	0	0														0.247253	6.37043	0.475654	11.7328	1.21712	6.74823
73	WallrockEquilibrate	AFC		794.445																																							11.2002		82.3109	50.8015	19.4604	1.11737	0.8307
75	WallrockChangeBulk	AFC		794.445														184.224	18.4224	165.721	0.080179	6.37484	15.7764	1																			11.2002		82.3109	50.8015	19.4604	1.11737	0.8307
78	MagmaIsoTFractionateB	AFC	1040.13	794.445		115.776	89.7229	1.20198	26.0535	0	0														0.0705781	6.44101	0.880761	12.6136	0.250639	6.99887
80	MagmaEquilibrateB	FC	1035.13	794.445		115.776	87.6904	2.03249	28.086	0	0														0.256456	6.69746	0.357222	12.9708	1.31337	8.31224	0.105439	0.105439
81	RechargeEquilibrate	RFC			1130								75	71.5717	3.4283	0																					3.4283
83	MagmaEquilibrateC	RFC	1081.01	794.445		190.776	158.121	4.56901	32.655	0	0														3.99338	10.6908	0.580484	13.5513	-0.00271233	8.30953	-0.00213991	0.103299
84	WallrockEquilibrate	AFC		798.224																																							11.1328		82.5164	48.4617	18.0568	1.1198	0.797072
86	WallrockChangeBulk	AFC		798.224														180.094	18.0094	162.085	0	4.12965	19.906																				11.1328		82.5164	48.4617	18.0568	1.1198	0.797072
89	MagmaIsoTFractionateB	AFC	1075.92	798.224		194.906	161.41	0.84156	33.4965	0	0														0.0082452	10.6991	0.833315	14.3846		8.30953		0.103299
91	MagmaEquilibrateB	FC	1070.92	798.224		194.906	159.6	1.80971	35.3062	0	0														-0.00156095	10.6975	1.81127	16.1959		8.30953		0.103299
92	WallrockEquilibrate	AFC		806.651																																							11.105		82.4523	47.7284	17.5837	1.12927	0.768769
94	WallrockChangeBulk	AFC		806.651														178.631	17.8631	160.767	0	1.46345	21.3695																				11.105		82.4523	47.7284	17.5837	1.12927	0.768769
97	MagmaIsoTFractionateB	AFC	1069.15	806.651		196.369	160.781	0.282628	35.5889	0	0															10.6975	0.282628	16.4785		8.30953		0.103299
99	MagmaEquilibrateB	FC	1064.15	806.651		196.369	159.065	1.71559	37.3045	0	0															10.6975	1.71559	18.1941		8.30953		0.103299
100	WallrockEquilibrate	AFC		814.687																																							11.077		82.4262	46.9712	17.1226	1.13905	0.739746
102	WallrockChangeBulk	AFC		814.687														177.195	17.7195	159.476	0	1.43509	22.8046																				11.077		82.4262	46.9712	17.1226	1.13905	0.739746
105	MagmaIsoTFractionateB	AFC	1062.49	814.687		197.805	160.249	0.251117	37.5556	0	0															10.6975	0.251117	18.4452		8.30953		0.103299
107	MagmaEquilibrateB	FC	1057.49	814.687		197.805	158.619	1.62979	39.1854	0	0															10.6975	1.62979	20.075		8.30953		0.103299
108	WallrockEquilibrate	AFC		822.893																																							11.0466		82.4419	46.1269	16.6382	1.14985	0.707806
110	WallrockChangeBulk	AFC		822.893														175.679	17.5679	158.111	0	1.51619	24.3208																				11.0466		82.4419	46.1269	16.6382	1.14985	0.707806
113	MagmaIsoTFractionateB	AFC	1055.82	822.893		199.321	159.897	0.238851	39.4242	0	0															10.6975	0.238851	20.3139		8.30953		0.103299
115	MagmaEquilibrateB	FC	1050.82	822.893		199.321	156.618	3.27848	42.7027	0	0														0.26863	10.9662	1.03248	21.3463	1.97737	10.2869		0.103299
116	WallrockEquilibrate	AFC		832.536																																							11.0081		82.528	45.0169	16.0437	1.16368	0.666768
118	WallrockChangeBulk	AFC		832.536														173.808	17.3808	156.427	0	1.8713	26.1921																				11.0081		82.528	45.0169	16.0437	1.16368	0.666768
121	MagmaIsoTFractionateB	AFC	1048.92	832.536		201.192	158.164	0.325844	43.0285	0	0														0.0217454	10.9879	0.208812	21.5552	0.0952868	10.3822		0.103299
123	MagmaEquilibrateB	FC	1043.92	832.536		201.192	154.828	3.33539	46.3639	0	0														0.413673	11.4016	0.755537	22.3107	2.16618	12.5484		0.103299
124	WallrockEquilibrate	AFC		842.201																																							10.9664		82.7049	43.7583	15.4199	1.17888	0.621601
126	WallrockChangeBulk	AFC		842.201														171.833	17.1833	154.65	0	1.97464	28.1667																				10.9664		82.7049	43.7583	15.4199	1.17888	0.621601
129	MagmaIsoTFractionateB	AFC	1042.08	842.201		203.167	156.512	0.290458	46.6544	0	0														0.0220917	11.4237	0.175132	22.4858	0.0932341	12.6416		0.103299
131	MagmaEquilibrateB	FC	1037.08	842.201		203.167	153.313	3.19938	49.8538	0	0														0.402404	11.8261	0.685036	23.1709	2.11194	14.7535		0.103299
132	WallrockEquilibrate	AFC		852.014																																							10.9201		83.0046	42.2915	14.7507	1.19583	0.570989
134	WallrockChangeBulk	AFC		852.014														169.704	16.9704	152.734	0	2.1291	30.2958																				10.9201		83.0046	42.2915	14.7507	1.19583	0.570989
137	MagmaIsoTFractionateB	AFC	1035.19	852.014		205.296	155.128	0.314126	50.1679	0	0														0.02989	11.856	0.155394	23.3263	0.128843	14.8824		0.103299
139	MagmaEquilibrateB	FC	1030.19	852.014		205.296	151.423	3.70533	53.8732	0	0														0.444191	12.3002	0.528289	23.8545	2.39435	17.2767	0.319321	0.42262	0.0191821	0.0191821
140	WallrockEquilibrate	AFC		862.216																																							10.867		83.4873	40.5035	14.0063	1.21524	0.512395
142	WallrockChangeBulk	AFC		862.216														167.324	16.7324	150.592	0	2.37997	32.6758																				10.867		83.4873	40.5035	14.0063	1.21524	0.512395
145	MagmaIsoTFractionateB	AFC	1028.34	862.216		207.676	153.478	0.32416	54.1974	0	0														0.0311238	12.3313	0.104888	23.9594	0.150577	17.4273	0.0425941	0.465214	-0.00502321	0.0141589
147	MagmaEquilibrateB	FC	1023.34	862.216		207.676	149.676	3.80272	58.0001	0	0														0.449937	12.7812	0.480604	24.44	2.37131	19.7986	0.307598	0.772812	0.193275	0.207433
148	WallrockEquilibrate	AFC		872.766																																							10.8059		84.2409	38.2778	13.1706	1.23745	0.444206
150	WallrockChangeBulk	AFC		872.766														164.641	16.4641	148.177	0	2.6832	35.359																				10.8059		84.2409	38.2778	13.1706	1.23745	0.444206
153	MagmaIsoTFractionateB	AFC	1021.43	872.766		210.359	152.034	0.324624	58.3247	0	0														0.0341622	12.8154	0.0804667	24.5205	0.17606	19.9747	0.0389577	0.81177	-0.00502321	0.20241
155	MagmaEquilibrateB	FC	1016.43	872.766		210.359	148.45	3.58421	61.9089	0	0														0.419019	13.2344	0.428335	24.9488	2.29567	22.2704	0.280556	1.09233	0.160624	0.363034
156	WallrockEquilibrate	AFC		882.997																																							10.7393		85.3278	35.6195	12.2819	1.26133	0.369374
158	WallrockChangeBulk	AFC		882.997														161.777	16.1777	145.599	0	2.86411	38.2231																				10.7393		85.3278	35.6195	12.2819	1.26133	0.369374
161	MagmaIsoTFractionateB	AFC	1014.65	882.997		213.223	150.94	0.37459	62.2835	0	0														-0.00162325	13.2328	-0.00223809	24.9466	0.221253	22.4916	0.0318282	1.12415	-0.00502321	0.358011	0.130393	0.130393
163	MagmaEquilibrateB	FC	1009.65	882.997		213.223	147.333	3.60648	65.89	0	0															13.2328	0.219459	25.1661	2.31545	24.8071	0.265438	1.38959	0.148629	0.506639	0.6575	0.787893
164	WallrockEquilibrate	AFC		893.022																																							10.6652		86.9128	32.3146	11.312	1.28727	0.285682
166	WallrockChangeBulk	AFC		893.022														158.642	15.8642	142.777	0	3.13524	41.3583																				10.6652		86.9128	32.3146	11.312	1.28727	0.285682
169	MagmaIsoTFractionateB	AFC	1007.98	893.022		216.358	150.029	0.439576	66.3296	0	0															13.2328	-0.00223969	25.1638	0.240215	25.0473	0.02435	1.41394	-0.00502321	0.501616	0.182274	0.970167
171	MagmaEquilibrateB	FC	1002.98	893.022		216.358	146.605	3.42423	69.7538	0	0															13.2328	0.0238882	25.1877	2.33289	27.3802	0.248265	1.66221	0.125023	0.626639	0.69416	1.66433
172	WallrockEquilibrate	AFC		902.674																																							10.5835		89.2276	28.1207	10.2546	1.31496	0.192803
174	WallrockChangeBulk	AFC		902.674														155.216	15.5216	139.694	0	3.42597	44.7843																				10.5835		89.2276	28.1207	10.2546	1.31496	0.192803
177	MagmaIsoTFractionateB	AFC	1001.38	902.674		219.784	149.617	0.413949	70.1678	0	0															13.2328	-0.00224165	25.1855	0.233456	27.6136	0.0194293	1.68164	-0.00502321	0.621616	0.168328	1.83265
179	MagmaEquilibrateB	FC	996.381	902.674		219.784	146.38	3.23641	73.4042	0	0															13.2328		25.1855	2.26166	29.8753	0.229504	1.91114	0.0965716	0.718187	0.64868	2.48133
180	RechargeEquilibrate	RFC			1080								70	36.2175	33.7825	0																						1.01289	13.8591	13.4897	4.95848	0.46234
182	MagmaEquilibrateC	RFC	1021.31	902.674		289.784	186.429	29.9509	103.355	0	0															13.2328	15.3564	40.5419	8.21505	38.0903	5.75854	7.66968	-0.00502321	0.713164	0.625933	3.10727
183	WallrockEquilibrate	AFC		911.964																																							10.4919		92.7494	22.5046	9.07766	1.34456	0.0883187
185	WallrockChangeBulk	AFC		911.964														151.396	15.1396	136.256	0	3.81968	48.604																				10.4919		92.7494	22.5046	9.07766	1.34456	0.0883187
188	MagmaIsoTFractionateB	AFC	1019.8	911.964		293.604	189.816	0.433014	103.788	0	0															13.2328	-0.00221667	40.5397	0.267316	38.3577	0.0215689	7.69125		0.713164	0.146347	3.25361
190	MagmaEquilibrateB	FC	1014.8	911.964		293.604	185.881	3.93488	107.723	0	0															13.2328	0.0473678	40.5871	2.95253	41.3102	0.238247	7.9295		0.713164	0.696732	3.95035
191	WallrockEquilibrate	AFC		923.138																																							10.3901		100.517	11.6935	7.35386	1.31043
193	WallrockChangeBulk	AFC		923.138														145.85	14.585	131.265	0	5.54639	54.1504																				10.3901		100.517	11.6935	7.35386	1.31043
196	MagmaIsoTFractionateB	AFC	1012.96	923.138		299.15	190.888	0.538991	108.262	0	0															13.2328	-0.0022176	40.5848	0.341924	41.6521	0.0227898	7.95229		0.713164	0.176495	4.12684
198	MagmaEquilibrateB	FC	1007.96	923.138		299.15	187.088	3.80077	112.063	0	0															13.2328		40.5848	2.90608	44.5582	0.224526	8.17681		0.713164	0.670165	4.79701
199	WallrockEquilibrate	AFC		934.594																																							10.3		108.647		5.30926	1.15706
201	WallrockChangeBulk	AFC		934.594														139.349	13.9349	125.414	0	6.50104	60.6514																				10.3		108.647		5.30926	1.15706
204	MagmaIsoTFractionateB	AFC	1006.27	934.594		305.651	193.064	0.524936	112.588	0	0															13.2328		40.5848	0.341139	44.8993	0.0169597	8.19377		0.713164	0.166837	4.96384
206	MagmaEquilibrateB	FC	1001.27	934.594		305.651	189.375	3.68855	116.276	0	0															13.2328		40.5848	2.84932	47.7486	0.211484	8.40526		0.713164	0.627751	5.59159
207	WallrockEquilibrate	AFC		945.602																																							10.1559		104.711		3.03982	1.00351
209	WallrockChangeBulk	AFC		945.602														132.123	13.2123	118.91	0	7.22585	67.8773																				10.1559		104.711		3.03982	1.00351
212	MagmaIsoTFractionateB	AFC	999.839	945.602		312.877	196.102	0.498969	116.775	0	0															13.2328		40.5848	0.335583	48.0842	0.0113186	8.41657		0.713164	0.152068	5.74366
214	MagmaEquilibrateB	FC	994.839	945.602		312.877	192.501	3.60145	120.377	0	0															13.2328		40.5848	2.80915	50.8934	0.200488	8.61706		0.713164	0.591809	6.33547
215	WallrockEquilibrate	AFC		956.168																																							9.92864		99.8328		0.221711	0.835513
217	WallrockChangeBulk	AFC		956.168														123.132	12.3132	110.819	0	8.99091	76.8682																				9.92864		99.8328		0.221711	0.835513
220	MagmaIsoTFractionateB	AFC	993.706	956.168		321.868	201.026	0.465328	120.842	0	0															13.2328		40.5848	0.318605	51.212	0.00402398	8.62109		0.713164	0.142699	6.47817
222	MagmaEquilibrateB	FC	988.706	956.168		321.868	197.471	3.55501	124.397	0	0															13.2328		40.5848	2.79943	54.0114	0.192077	8.81316		0.713164	0.563503	7.04167
223	WallrockEquilibrate	AFC		974.094																																							9.7939		98.3725			0.787823
225	WallrockChangeBulk	AFC		974.094														121.06	12.106	108.954	0	2.07158	78.9398																				9.7939		98.3725			0.787823
228	MagmaIsoTFractionateB	AFC	988.627	974.094		323.94	199.476	0.0669561	124.464	0	0															13.2328		40.5848	0.0440777	54.0555	0.000993899	8.81416		0.713164	0.0218845	7.06356
230	MagmaEquilibrateB	FC	983.627	974.094		323.94	196.047	3.42873	127.893	0	0															13.2328		40.5848	2.71449	56.77	0.181532	8.99569		0.713164	0.53271	7.59627
231	WallrockEquilibrate	AFC		991.684																																							9.64024		97.0803			0.748077
[truncated: 50 more columns]

## Sheet: SolidFormulas
Run	Temp	Solid.Name	Formula	Si	Ti	Al	Fe	Fe''	Fe'''	Cr	Mg	Mn	Ni	Co	Ca	Na	K	P	H	C	O	OH	Unexpected			SiO2	TiO2	Al2O3	Fe2O3	Cr2O3	FeO	MnO	MgO	NiO	CoO	CaO	Na2O	K2O	P2O5	H2O	CO2
WallrockFindSolidus	875	orthopyroxene	opx Na0.00Ca0.03Fe''0.87Mg1.06Fe'''0.02Ti0.00Al0.05Si1.97O6																							51.5409	0.0222854	1.10015	0.584179		27.2827		18.6769			0.775349	0.017514
WallrockFindSolidus	875	feldspar	K0.16Na0.69Ca0.15Al1.15Si2.85O8	2.85		1.15									0.15	0.69	0.16				8			K=0.16;Na=0.69;Ca=0.15;Al=1.15;Si=2.85;O=8		63.9877		22.0118								3.22928	7.96469	2.80661
WallrockFindSolidus	875	feldspar	K0.47Na0.49Ca0.04Al1.04Si2.96O8	2.96		1.04									0.04	0.49	0.47				8			K=0.47;Na=0.49;Ca=0.04;Al=1.04;Si=2.96;O=8		65.7246		19.6379								0.865536	5.61189	8.16011
WallrockFindSolidus	875	quartz	SiO2	1																	2			Si=1;O=2		100
WallrockFindSolidus	875	spinel	Fe''1.26Mg0.10Fe'''1.21Al0.07Cr0.00Ti0.36O4																								12.7632	1.64822	43.3379		40.5097		1.74093
WallrockFindSolidus	870	orthopyroxene	opx Na0.00Ca0.03Fe''0.87Mg1.06Fe'''0.02Ti0.00Al0.05Si1.97O6																							51.5575	0.0225686	1.07818	0.559365		27.316		18.6603			0.788735	0.0173223
WallrockFindSolidus	870	feldspar	K0.15Na0.69Ca0.16Al1.16Si2.84O8	2.84		1.16									0.16	0.69	0.15				8			K=0.15;Na=0.69;Ca=0.16;Al=1.16;Si=2.84;O=8		63.8929		22.101								3.325	7.98747	2.69363
WallrockFindSolidus	870	feldspar	K0.48Na0.48Ca0.04Al1.04Si2.96O8	2.96		1.04									0.04	0.48	0.48				8			K=0.48;Na=0.48;Ca=0.04;Al=1.04;Si=2.96;O=8		65.7331		19.5914								0.825163	5.50891	8.34146
WallrockFindSolidus	870	quartz	SiO2	1																	2			Si=1;O=2		100
WallrockFindSolidus	870	spinel	Fe''1.28Mg0.10Fe'''1.18Al0.07Cr0.00Ti0.37O4																								13.3731	1.59018	42.232		41.058		1.74669
WallrockFindSolidus	865	orthopyroxene	opx Na0.00Ca0.03Fe''0.87Mg1.06Fe'''0.02Ti0.00Al0.05Si1.97O6																							51.565	0.0220337	1.05921	0.544011		27.3583		18.6323			0.801986	0.0171681
WallrockFindSolidus	865	feldspar	K0.15Na0.69Ca0.16Al1.16Si2.84O8	2.84		1.16									0.16	0.69	0.15				8			K=0.15;Na=0.69;Ca=0.16;Al=1.16;Si=2.84;O=8		63.8008		22.1866								3.41714	8.00672	2.58872
WallrockFindSolidus	865	feldspar	K0.49Na0.47Ca0.04Al1.04Si2.96O8	2.96		1.04									0.04	0.47	0.49				8			K=0.49;Na=0.47;Ca=0.04;Al=1.04;Si=2.96;O=8		65.7395		19.5482								0.788003	5.40999	8.51432
WallrockFindSolidus	865	quartz	SiO2	1																	2			Si=1;O=2		100
WallrockFindSolidus	865	spinel	Fe''1.28Mg0.10Fe'''1.18Al0.07Cr0.00Ti0.38O4																								13.4278	1.55765	42.1539		41.134		1.72661
WallrockFindSolidus	865	rhm-oxide	Mn0.03Fe''0.71Mg0.13Fe'''0.21Al0.06Ti0.87O3																								47.1664	1.96967	11.3151		34.6163	1.29405	3.63851
WallrockFindSolidus	860	orthopyroxene	opx Na0.00Ca0.03Fe''0.88Mg1.06Fe'''0.02Ti0.00Al0.05Si1.97O6																							51.569	0.0211954	1.04142	0.532409		27.4042		18.5999			0.814774	0.0170311
WallrockFindSolidus	860	feldspar	K0.14Na0.69Ca0.17Al1.17Si2.83O8	2.83		1.17									0.17	0.69	0.14				8			K=0.14;Na=0.69;Ca=0.17;Al=1.17;Si=2.83;O=8		63.7155		22.2656								3.50222	8.02365	2.49304
WallrockFindSolidus	860	feldspar	K0.50Na0.46Ca0.04Al1.04Si2.96O8	2.96		1.04									0.04	0.46	0.5				8			K=0.5;Na=0.46;Ca=0.04;Al=1.04;Si=2.96;O=8		65.7448		19.5083								0.753865	5.31719	8.67585
WallrockFindSolidus	860	quartz	SiO2	1																	2			Si=1;O=2		100
WallrockFindSolidus	860	spinel	Fe''1.28Mg0.09Fe'''1.19Al0.07Cr0.00Ti0.37O4																								13.253	1.535	42.5013		41.0147		1.69597
WallrockFindSolidus	860	rhm-oxide	Mn0.03Fe''0.71Mg0.13Fe'''0.21Al0.06Ti0.87O3																								47.1951	1.93526	11.2784		34.6338	1.34111	3.61639
WallrockFindSolidus	855	orthopyroxene	opx Na0.00Ca0.03Fe''0.88Mg1.06Fe'''0.01Ti0.00Al0.05Si1.97O6																							51.5743	0.0203846	1.02344	0.520816		27.4457		18.5713			0.827116	0.0168999
WallrockFindSolidus	855	feldspar	K0.14Na0.69Ca0.17Al1.17Si2.83O8	2.83		1.17									0.17	0.69	0.14				8			K=0.14;Na=0.69;Ca=0.17;Al=1.17;Si=2.83;O=8		63.6387		22.3369								3.57893	8.03928	2.40626
WallrockFindSolidus	855	feldspar	K0.51Na0.46Ca0.03Al1.03Si2.97O8	2.97		1.03									0.03	0.46	0.51				8			K=0.51;Na=0.46;Ca=0.03;Al=1.03;Si=2.97;O=8		65.7495		19.4714								0.72238	5.23101	8.8257
WallrockFindSolidus	855	quartz	SiO2	1																	2			Si=1;O=2		100
WallrockFindSolidus	855	spinel	Fe''1.27Mg0.09Fe'''1.20Al0.07Cr0.00Ti0.37O4																								13.0778	1.51233	42.85		40.8936		1.66622
WallrockFindSolidus	855	rhm-oxide	Mn0.03Fe''0.71Mg0.13Fe'''0.21Al0.05Ti0.87O3																								47.2231	1.90103	11.2432		34.6506	1.38701	3.59501
WallrockFindSolidus	850	orthopyroxene	opx Na0.00Ca0.03Fe''0.88Mg1.06Fe'''0.01Ti0.00Al0.05Si1.97O6																							51.5808	0.0196	1.00533	0.509241		27.4833		18.5459			0.839091	0.0167738
WallrockFindSolidus	850	feldspar	K0.13Na0.69Ca0.17Al1.17Si2.83O8	2.83		1.17									0.17	0.69	0.13				8			K=0.13;Na=0.69;Ca=0.17;Al=1.17;Si=2.83;O=8		63.5694		22.4014								3.64836	8.05405	2.32683
WallrockFindSolidus	850	feldspar	K0.52Na0.45Ca0.03Al1.03Si2.97O8	2.97		1.03									0.03	0.45	0.52				8			K=0.52;Na=0.45;Ca=0.03;Al=1.03;Si=2.97;O=8		65.7537		19.4371								0.693095	5.15035	8.96578
WallrockFindSolidus	850	quartz	SiO2	1																	2			Si=1;O=2		100
WallrockFindSolidus	850	spinel	Fe''1.27Mg0.09Fe'''1.21Al0.07Cr0.00Ti0.36O4																								12.9026	1.48962	43.1993		40.7712		1.63728
WallrockFindSolidus	850	rhm-oxide	Mn0.03Fe''0.71Mg0.13Fe'''0.21Al0.05Ti0.87O3																								47.2507	1.86702	11.2091		34.6672	1.43173	3.57424
WallrockFindSolidus	845	orthopyroxene	opx Na0.00Ca0.03Fe''0.88Mg1.05Fe'''0.01Ti0.00Al0.04Si1.97O6																							51.5882	0.0188403	0.987096	0.497695		27.5174		18.5233			0.850771	0.0166519
WallrockFindSolidus	845	feldspar	K0.13Na0.70Ca0.18Al1.18Si2.82O8	2.82		1.18									0.18	0.7	0.13				8			K=0.13;Na=0.7;Ca=0.18;Al=1.18;Si=2.82;O=8		63.5067		22.4601								3.7114	8.06826	2.25354
WallrockFindSolidus	845	feldspar	K0.52Na0.44Ca0.03Al1.03Si2.97O8	2.97		1.03									0.03	0.44	0.52				8			K=0.52;Na=0.44;Ca=0.03;Al=1.03;Si=2.97;O=8		65.7574		19.4049								0.66567	5.07436	9.09761
WallrockFindSolidus	845	quartz	SiO2	1																	2			Si=1;O=2		100
WallrockFindSolidus	845	spinel	Fe''1.27Mg0.09Fe'''1.22Al0.06Cr0.00Ti0.36O4																								12.7277	1.46691	43.5484		40.6479		1.6091
WallrockFindSolidus	845	rhm-oxide	Mn0.03Fe''0.71Mg0.13Fe'''0.21Al0.05Ti0.87O3																								47.278	1.83324	11.1757		34.6837	1.47528	3.55398
WallrockFindSolidus	840	orthopyroxene	opx Na0.00Ca0.04Fe''0.88Mg1.05Fe'''0.01Ti0.00Al0.04Si1.97O6																							51.5966	0.0181044	0.968775	0.486184		27.5484		18.5032			0.862219	0.0165339
WallrockFindSolidus	840	feldspar	K0.12Na0.70Ca0.18Al1.18Si2.82O8	2.82		1.18									0.18	0.7	0.12				8			K=0.12;Na=0.7;Ca=0.18;Al=1.18;Si=2.82;O=8		63.4499		22.5136								3.7688	8.08215	2.18546
WallrockFindSolidus	840	feldspar	K0.53Na0.44Ca0.03Al1.03Si2.97O8	2.97		1.03									0.03	0.44	0.53				8			K=0.53;Na=0.44;Ca=0.03;Al=1.03;Si=2.97;O=8		65.7608		19.3746								0.639844	5.00236	9.22239
WallrockFindSolidus	840	quartz	SiO2	1																	2			Si=1;O=2		100
WallrockFindSolidus	840	spinel	Fe''1.26Mg0.09Fe'''1.23Al0.06Cr0.00Ti0.35O4																								12.5533	1.4442	43.8968		40.524		1.58162
WallrockFindSolidus	840	rhm-oxide	Mn0.03Fe''0.71Mg0.13Fe'''0.21Al0.05Ti0.87O3																								47.3051	1.79971	11.1428		34.7006	1.51766	3.53414
WallrockFindSolidus	835	orthopyroxene	opx Na0.00Ca0.04Fe''0.88Mg1.05Fe'''0.01Ti0.00Al0.04Si1.97O6																							51.6057	0.0173913	0.950385	0.474719		27.5765		18.4854			0.873493	0.0164192
WallrockFindSolidus	835	feldspar	K0.12Na0.70Ca0.18Al1.18Si2.82O8	2.82		1.18									0.18	0.7	0.12				8			K=0.12;Na=0.7;Ca=0.18;Al=1.18;Si=2.82;O=8		63.3985		22.5626								3.82119	8.09586	2.12185
WallrockFindSolidus	835	feldspar	K0.54Na0.43Ca0.03Al1.03Si2.97O8	2.97		1.03									0.03	0.43	0.54				8			K=0.54;Na=0.43;Ca=0.03;Al=1.03;Si=2.97;O=8		65.7639		19.3458								0.615414	4.93379	9.3411
WallrockFindSolidus	835	quartz	SiO2	1																	2			Si=1;O=2		100
WallrockFindSolidus	835	spinel	Fe''1.26Mg0.09Fe'''1.24Al0.06Cr0.00Ti0.35O4																								12.3798	1.42149	44.244		40.3999		1.55479
WallrockFindSolidus	835	rhm-oxide	Mn0.03Fe''0.71Mg0.13Fe'''0.20Al0.05Ti0.87O3																								47.3321	1.76644	11.11		34.7179	1.55888	3.51464
WallrockFindSolidus	830	orthopyroxene	opx Na0.00Ca0.04Fe''0.88Mg1.05Fe'''0.01Ti0.00Al0.04Si1.97O6																							51.6155	0.0167004	0.931946	0.463306		27.602		18.4696			0.884644	0.0163074
WallrockFindSolidus	830	feldspar	K0.12Na0.70Ca0.18Al1.18Si2.82O8	2.82		1.18									0.18	0.7	0.12				8			K=0.12;Na=0.7;Ca=0.18;Al=1.18;Si=2.82;O=8		63.3519		22.6074								3.86909	8.1095	2.0621
WallrockFindSolidus	830	feldspar	K0.54Na0.43Ca0.03Al1.03Si2.97O8	2.97		1.03									0.03	0.43	0.54				8			K=0.54;Na=0.43;Ca=0.03;Al=1.03;Si=2.97;O=8		65.7666		19.3185								0.592217	4.86816	9.45455
WallrockFindSolidus	830	quartz	SiO2	1																	2			Si=1;O=2		100
WallrockFindSolidus	830	spinel	Fe''1.26Mg0.09Fe'''1.25Al0.06Cr0.00Ti0.34O4																								12.2072	1.3988	44.5896		40.2758		1.52857
WallrockFindSolidus	830	rhm-oxide	Mn0.03Fe''0.71Mg0.13Fe'''0.20Al0.05Ti0.87O3																								47.3591	1.73344	11.0773		34.7358	1.59894	3.49541
WallrockFindSolidus	825	orthopyroxene	opx Na0.00Ca0.04Fe''0.88Mg1.05Fe'''0.01Ti0.00Al0.04Si1.97O6																							51.6259	0.0160307	0.913478	0.451956		27.6253		18.4555			0.895722	0.0161981
WallrockFindSolidus	825	feldspar	K0.11Na0.70Ca0.19Al1.19Si2.81O8	2.81		1.19									0.19	0.7	0.11				8			K=0.11;Na=0.7;Ca=0.19;Al=1.19;Si=2.81;O=8		63.3095		22.6486								3.91295	8.12315	2.00573
WallrockFindSolidus	825	feldspar	K0.55Na0.42Ca0.03Al1.03Si2.97O8	2.97		1.03									0.03	0.42	0.55				8			K=0.55;Na=0.42;Ca=0.03;Al=1.03;Si=2.97;O=8		65.769		19.2924								0.570123	4.80511	9.56339
WallrockFindSolidus	825	quartz	SiO2	1																	2			Si=1;O=2		100
WallrockFindSolidus	825	spinel	Fe''1.25Mg0.08Fe'''1.26Al0.06Cr0.00Ti0.34O4																								12.0358	1.37614	44.9333		40.1519		1.50293
WallrockFindSolidus	825	rhm-oxide	Mn0.03Fe''0.71Mg0.13Fe'''0.20Al0.05Ti0.87O3																								47.3861	1.70071	11.0443		34.7546	1.63785	3.4764
WallrockFindSolidus	820	orthopyroxene	opx Na0.00Ca0.04Fe''0.88Mg1.05Fe'''0.01Ti0.00Al0.04Si1.97O6																							51.6367	0.0153817	0.894996	0.440674		27.6464		18.4429			0.906769	0.0160911
WallrockFindSolidus	820	feldspar	K0.11Na0.70Ca0.19Al1.19Si2.81O8	2.81		1.19									0.19	0.7	0.11				8			K=0.11;Na=0.7;Ca=0.19;Al=1.19;Si=2.81;O=8		63.2711		22.6865								3.95317	8.13687	1.95233
WallrockFindSolidus	820	feldspar	K0.56Na0.42Ca0.03Al1.03Si2.97O8	2.97		1.03									0.03	0.42	0.56				8			K=0.56;Na=0.42;Ca=0.03;Al=1.03;Si=2.97;O=8		65.7711		19.2674								0.549024	4.7443	9.66818
WallrockFindSolidus	820	quartz	SiO2	1																	2			Si=1;O=2		100
WallrockFindSolidus	820	spinel	Fe''1.25Mg0.08Fe'''1.27Al0.06Cr0.00Ti0.33O4																								11.8657	1.35352	45.2747		40.0283		1.47783
WallrockFindSolidus	820	rhm-oxide	Mn0.03Fe''0.71Mg0.13Fe'''0.20Al0.05Ti0.87O3																								47.4132	1.66827	11.011		34.7743	1.67561	3.45755
WallrockFindSolidus	815	orthopyroxene	opx Na0.00Ca0.04Fe''0.88Mg1.05Fe'''0.01Ti0.00Al0.04Si1.97O6																							51.6481	0.0147528	0.876516	0.42947		27.6656		18.4318			0.917828	0.0159861
WallrockFindSolidus	815	feldspar	K0.11Na0.70Ca0.19Al1.19Si2.81O8	2.81		1.19									0.19	0.7	0.11				8			K=0.11;Na=0.7;Ca=0.19;Al=1.19;Si=2.81;O=8		63.2363		22.7214								3.99008	8.15067	1.90157
WallrockFindSolidus	815	feldspar	K0.56Na0.41Ca0.03Al1.03Si2.97O8	2.97		1.03									0.03	0.41	0.56				8			K=0.56;Na=0.41;Ca=0.03;Al=1.03;Si=2.97;O=8		65.7729		19.2434								0.52883	4.68545	9.76939
WallrockFindSolidus	815	quartz	SiO2	1																	2			Si=1;O=2		100
WallrockFindSolidus	815	spinel	Fe''1.25Mg0.08Fe'''1.28Al0.06Cr0.00Ti0.33O4																								11.6969	1.33094	45.6136		39.9053		1.45324
WallrockFindSolidus	815	rhm-oxide	Mn0.04Fe''0.71Mg0.13Fe'''0.20Al0.05Ti0.88O3																								47.4405	1.63612	10.9772		34.7951	1.71224	3.43882
WallrockFindSolidus	810	orthopyroxene	opx Na0.00Ca0.04Fe''0.89Mg1.05Fe'''0.01Ti0.00Al0.04Si1.97O6																							51.6598	0.0141435	0.858053	0.418351		27.683		18.4218			0.928938	0.0158828
WallrockFindSolidus	810	feldspar	K0.11Na0.70Ca0.19Al1.19Si2.81O8	2.81		1.19									0.19	0.7	0.11				8			K=0.11;Na=0.7;Ca=0.19;Al=1.19;Si=2.81;O=8		63.2047		22.7536								4.02399	8.16461	1.85316
WallrockFindSolidus	810	feldspar	K0.57Na0.41Ca0.02Al1.02Si2.98O8	2.98		1.02									0.02	0.41	0.57				8			K=0.57;Na=0.41;Ca=0.02;Al=1.02;Si=2.98;O=8		65.7744		19.2204								0.509469	4.62834	9.86743
WallrockFindSolidus	810	quartz	SiO2	1																	2			Si=1;O=2		100
WallrockFindSolidus	810	spinel	Fe''1.24Mg0.08Fe'''1.29Al0.06Cr0.00Ti0.32O4																								11.5297	1.30841	45.9498		39.7829		1.42913
WallrockFindSolidus	810	rhm-oxide	Mn0.04Fe''0.71Mg0.13Fe'''0.20Al0.05Ti0.88O3																								47.4679	1.60427	10.9428		34.8171	1.74774	3.42016
WallrockFindSolidus	805	orthopyroxene	opx Na0.00Ca0.04Fe''0.89Mg1.05Fe'''0.01Ti0.00Al0.04Si1.98O6																							51.6718	0.0135532	0.83962	0.407323		27.6988		18.413			0.940134	0.0157811
WallrockFindSolidus	805	feldspar	K0.10Na0.70Ca0.19Al1.19Si2.81O8	2.81		1.19									0.19	0.7	0.1				8			K=0.1;Na=0.7;Ca=0.19;Al=1.19;Si=2.81;O=8		63.1761		22.7832								4.05514	8.17868	1.80685
WallrockFindSolidus	805	feldspar	K0.58Na0.40Ca0.02Al1.02Si2.98O8	2.98		1.02									0.02	0.4	0.58				8			K=0.58;Na=0.4;Ca=0.02;Al=1.02;Si=2.98;O=8		65.7756		19.1982								0.490875	4.57276	9.96263
WallrockFindSolidus	805	quartz	SiO2	1																	2			Si=1;O=2		100
WallrockFindSolidus	805	spinel	Fe''1.24Mg0.08Fe'''1.30Al0.06Cr0.00Ti0.32O4																								11.364	1.28595	46.2832		39.6613		1.40548
WallrockFindSolidus	805	rhm-oxide	Mn0.04Fe''0.72Mg0.12Fe'''0.20Al0.05Ti0.88O3																								47.4956	1.57272	10.9077		34.8403	1.78211	3.40154
WallrockFindSolidus	800	orthopyroxene	opx Na0.00Ca0.04Fe''0.89Mg1.05Fe'''0.01Ti0.00Al0.04Si1.98O6																							51.6842	0.0129815	0.821229	0.396393		27.7129		18.4052			0.951454	0.0156808
WallrockFindSolidus	800	feldspar	K0.10Na0.71Ca0.19Al1.19Si2.81O8	2.81		1.19									0.19	0.71	0.1				8			K=0.1;Na=0.71;Ca=0.19;Al=1.19;Si=2.81;O=8		63.1502		22.8106								4.08377	8.1929	1.76246
WallrockFindSolidus	800	feldspar	K0.58Na0.40Ca0.02Al1.02Si2.98O8	2.98		1.02									0.02	0.4	0.58				8			K=0.58;Na=0.4;Ca=0.02;Al=1.02;Si=2.98;O=8		65.7764		19.1768								0.472995	4.51853	10.0553
WallrockFindSolidus	800	quartz	SiO2	1																	2			Si=1;O=2		100
WallrockFindSolidus	800	spinel	Fe''1.24Mg0.08Fe'''1.31Al0.06Cr0.00Ti0.32O4																								11.2	1.26355	46.6136		39.5405		1.38227
WallrockFindSolidus	800	rhm-oxide	Mn0.04Fe''0.72Mg0.12Fe'''0.20Al0.04Ti0.88O3																								47.5235	1.54147	10.8718		34.8649	1.81537	3.38293
WallrockFindSolidus	795	orthopyroxene	opx Na0.00Ca0.04Fe''0.89Mg1.05Fe'''0.01Ti0.00Al0.04Si1.98O6																							51.7036	0.012291	0.792767	0.383567		27.7152		18.3942			0.982771	0.0156489
WallrockFindSolidus	795	feldspar	K0.10Na0.71Ca0.20Al1.20Si2.80O8	2.8		1.2									0.2	0.71	0.1				8			K=0.1;Na=0.71;Ca=0.2;Al=1.2;Si=2.8;O=8		63.1155		22.8444								4.1197	8.20398	1.71643
WallrockFindSolidus	795	feldspar	K0.59Na0.39Ca0.02Al1.02Si2.98O8	2.98		1.02									0.02	0.39	0.59				8			K=0.59;Na=0.39;Ca=0.02;Al=1.02;Si=2.98;O=8		65.7754		19.1555								0.455685	4.46056	10.1528
WallrockFindSolidus	795	quartz	SiO2	1																	2			Si=1;O=2		100
WallrockFindSolidus	795	spinel	Fe''1.24Mg0.08Fe'''1.32Al0.05Cr0.00Ti0.31O4																								11.0325	1.23206	46.9605		39.4175		1.35744
WallrockFindSolidus	795	rhm-oxide	Mn0.04Fe''0.72Mg0.12Fe'''0.20Al0.04Ti0.88O3																								47.5489	1.49879	10.852		34.8529	1.88373	3.36361
WallrockFindSolidus	795	fluid	H2O1.00CO20.00											20					2		11			H=2;O=11;CO=20																100
WallrockFindSolidus	790	orthopyroxene	opx Na0.00Ca0.04Fe''0.91Mg1.02Fe'''0.01Ti0.00Al0.03Si1.98O6																							51.5389	0.0105402	0.758104	0.378447		28.415		17.8644			1.01918	0.0155191
WallrockFindSolidus	790	clinopyroxene	cpx Na0.03Ca0.86Fe''0.35Mg0.68Fe'''0.04Ti0.02Al0.09Si1.94O6																							51.2938	0.547582	1.91	1.38869		11.1492		12.0874			21.1975	0.425729
WallrockFindSolidus	790	feldspar	K0.10Na0.71Ca0.19Al1.19Si2.81O8	2.81		1.19									0.19	0.71	0.1				8			K=0.1;Na=0.71;Ca=0.19;Al=1.19;Si=2.81;O=8		63.1993		22.7903								4.05553	8.24902	1.7058
WallrockFindSolidus	790	feldspar	K0.59Na0.39Ca0.02Al1.02Si2.98O8	2.98		1.02									0.02	0.39	0.59				8			K=0.59;Na=0.39;Ca=0.02;Al=1.02;Si=2.98;O=8		65.7901		19.1405								0.43985	4.45379	10.1758
WallrockFindSolidus	790	quartz	SiO2	1																	2			Si=1;O=2		100
WallrockFindSolidus	790	spinel	Fe''1.23Mg0.07Fe'''1.34Al0.05Cr0.00Ti0.30O4																								10.6941	1.18818	47.6147		39.2393		1.26375
WallrockFindSolidus	790	rhm-oxide	Mn0.07Fe''0.69Mg0.12Fe'''0.21Al0.04Ti0.88O3																								47.4046	1.43309	11.1227		33.5231	3.26366	3.25281
WallrockFindSolidus	790	apatite	Ca5(PO4)3OH												15			3	1		1			Ca=15;P=3;O=1;H=1												55.8202			42.3866	1.79319
WallrockFindSolidus	790	fluid	H2O1.00CO20.00											20					2		11			H=2;O=11;CO=20																100
WallrockFindSolidus	785	olivine	(Ca0.00Mg0.00Fe''0.53Mn0.47Co0.00Ni0.00)2SiO4	1				1.06			0	0.94	0.002	0	0						4			Ca=0;Mg=0;Fe''=1.06;Mn=0.94;Co=0;Ni=0.002;Si=1;O=4		29.6116					37.4813	32.8817	1.88591e-05			0.0253119
WallrockFindSolidus	785	orthopyroxene	opx Na0.09Ca0.09Fe''0.19Mg1.54Fe'''0.09Ti0.03Al0.00Si1.97O6																							56.0095	1.11456	6.37578e-05	3.53395		6.29649		29.3996			2.2747	1.37117
WallrockFindSolidus	785	clinopyroxene	cpx Na0.02Ca0.89Fe''0.35Mg0.72Fe'''0.02Ti0.00Al0.01Si2.00O6																							52.9169	0.0361837	0.118626	0.736221		11.2014		12.8057			21.9295	0.255459
WallrockFindSolidus	785	amphibole	cAph Ca0.01Fe6.96Mg0.03Si8O22(OH)2																							48.0459					49.9723		0.130973			0.0501356				1.80071
WallrockFindSolidus	785	feldspar	K0.11Na0.73Ca0.15Al1.15Si2.85O8	2.85		1.15									0.15	0.73	0.11				8			K=0.11;Na=0.73;Ca=0.15;Al=1.15;Si=2.85;O=8		64.1733		22.0718								3.23547	8.53577	1.98366
WallrockFindSolidus	785	feldspar	K0.57Na0.41Ca0.02Al1.02Si2.98O8	2.98		1.02									0.02	0.41	0.57				8			K=0.57;Na=0.41;Ca=0.02;Al=1.02;Si=2.98;O=8		65.9355		19.0991								0.37181	4.66946	9.92412
WallrockFindSolidus	785	quartz	SiO2	1																	2			Si=1;O=2		100
WallrockFindSolidus	785	tridymite	SiO2																							100
WallrockFindSolidus	785	cristobalite	SiO2	1																	2			Si=1;O=2		100
WallrockFindSolidus	785	rutile	TiO2																								100
WallrockFindSolidus	785	spinel	Fe''1.02Mg0.00Fe'''1.95Al0.01Cr0.00Ti0.02O4																								0.613105	0.317909	67.4188		31.6393		0.0109279
WallrockFindSolidus	785	rhm-oxide	Mn0.11Fe''0.82Mg0.06Fe'''0.03Al0.01Ti0.98O3																								52.2675	0.276851	1.69094		39.2577	5.01083	1.4962
WallrockFindSolidus	785	apatite	Ca5(PO4)3OH												15			3	1		1			Ca=15;P=3;O=1;H=1												55.8202			42.3866	1.79319
WallrockFindSolidus	785	fluid	H2O1.00CO20.00											20					2		11			H=2;O=11;CO=20																100
WallrockFindSolidus	780	olivine	(Ca0.00Mg0.00Fe''0.53Mn0.47Co0.00Ni0.00)2SiO4	1				1.06			0	0.94	0.002	0	0						4			Ca=0;Mg=0;Fe''=1.06;Mn=0.94;Co=0;Ni=0.002;Si=1;O=4		29.6116					37.4813	32.8817	1.88591e-05			0.0253119
WallrockFindSolidus	780	orthopyroxene	opx Na0.09Ca0.09Fe''0.19Mg1.54Fe'''0.09Ti0.03Al0.00Si1.97O6																							56.0095	1.11456	6.37578e-05	3.53395		6.29649		29.3996			2.2747	1.37117
WallrockFindSolidus	780	clinopyroxene	cpx Na0.02Ca0.89Fe''0.35Mg0.72Fe'''0.02Ti0.00Al0.01Si2.00O6																							52.9169	0.0361837	0.118626	0.736221		11.2014		12.8057			21.9295	0.255459
WallrockFindSolidus	780	amphibole	cAph Ca0.01Fe6.96Mg0.03Si8O22(OH)2																							48.0459					49.9723		0.130973			0.0501356				1.80071
WallrockFindSolidus	780	feldspar	K0.11Na0.73Ca0.15Al1.15Si2.85O8	2.85		1.15									0.15	0.73	0.11				8			K=0.11;Na=0.73;Ca=0.15;Al=1.15;Si=2.85;O=8		64.1733		22.0718								3.23547	8.53577	1.98366
WallrockFindSolidus	780	feldspar	K0.57Na0.41Ca0.02Al1.02Si2.98O8	2.98		1.02									0.02	0.41	0.57				8			K=0.57;Na=0.41;Ca=0.02;Al=1.02;Si=2.98;O=8		65.9355		19.0991								0.37181	4.66946	9.92412
WallrockFindSolidus	780	quartz	SiO2	1																	2			Si=1;O=2		100
WallrockFindSolidus	780	tridymite	SiO2																							100
WallrockFindSolidus	780	cristobalite	SiO2	1																	2			Si=1;O=2		100
WallrockFindSolidus	780	rutile	TiO2																								100
WallrockFindSolidus	780	spinel	Fe''1.02Mg0.00Fe'''1.95Al0.01Cr0.00Ti0.02O4																								0.613105	0.317909	67.4188		31.6393		0.0109279
WallrockFindSolidus	780	rhm-oxide	Mn0.11Fe''0.82Mg0.06Fe'''0.03Al0.01Ti0.98O3																								52.2675	0.276851	1.69094		39.2577	5.01083	1.4962
WallrockFindSolidus	780	apatite	Ca5(PO4)3OH												15			3	1		1			Ca=15;P=3;O=1;H=1												55.8202			42.3866	1.79319
WallrockFindSolidus	780	fluid	H2O1.00CO20.00											20					2		11			H=2;O=11;CO=20																100
WallrockFindSolidus	775	olivine	(Ca0.00Mg0.00Fe''0.53Mn0.47Co0.00Ni0.00)2SiO4	1				1.06			0	0.94	0.002	0	0						4			Ca=0;Mg=0;Fe''=1.06;Mn=0.94;Co=0;Ni=0.002;Si=1;O=4		29.6116					37.4813	32.8817	1.88591e-05			0.0253119
WallrockFindSolidus	775	orthopyroxene	opx Na0.09Ca0.09Fe''0.19Mg1.54Fe'''0.09Ti0.03Al0.00Si1.97O6																							56.0095	1.11456	6.37578e-05	3.53395		6.29649		29.3996			2.2747	1.37117
WallrockFindSolidus	775	clinopyroxene	cpx Na0.02Ca0.89Fe''0.35Mg0.72Fe'''0.02Ti0.00Al0.01Si2.00O6																							52.9169	0.0361837	0.118626	0.736221		11.2014		12.8057			21.9295	0.255459
WallrockFindSolidus	775	amphibole	cAph Ca0.01Fe6.96Mg0.03Si8O22(OH)2																							48.0459					49.9723		0.130973			0.0501356				1.80071
WallrockFindSolidus	775	feldspar	K0.11Na0.73Ca0.15Al1.15Si2.85O8	2.85		1.15									0.15	0.73	0.11				8			K=0.11;Na=0.73;Ca=0.15;Al=1.15;Si=2.85;O=8		64.1733		22.0718								3.23547	8.53577	1.98366
WallrockFindSolidus	775	feldspar	K0.57Na0.41Ca0.02Al1.02Si2.98O8	2.98		1.02									0.02	0.41	0.57				8			K=0.57;Na=0.41;Ca=0.02;Al=1.02;Si=2.98;O=8		65.9355		19.0991								0.37181	4.66946	9.92412
WallrockFindSolidus	775	quartz	SiO2	1																	2			Si=1;O=2		100
WallrockFindSolidus	775	tridymite	SiO2																							100
WallrockFindSolidus	775	cristobalite	SiO2	1																	2			Si=1;O=2		100
WallrockFindSolidus	775	rutile	TiO2																								100
WallrockFindSolidus	775	spinel	Fe''1.02Mg0.00Fe'''1.95Al0.01Cr0.00Ti0.02O4																								0.613105	0.317909	67.4188		31.6393		0.0109279
WallrockFindSolidus	775	rhm-oxide	Mn0.11Fe''0.82Mg0.06Fe'''0.03Al0.01Ti0.98O3																								52.2675	0.276851	1.69094		39.2577	5.01083	1.4962
WallrockFindSolidus	775	apatite	Ca5(PO4)3OH												15			3	1		1			Ca=15;P=3;O=1;H=1												55.8202			42.3866	1.79319
WallrockFindSolidus	775	fluid	H2O1.00CO20.00											20					2		11			H=2;O=11;CO=20																100
WallrockFindSolidus	770	olivine	(Ca0.00Mg0.00Fe''0.53Mn0.47Co0.00Ni0.00)2SiO4	1				1.06			0	0.94	0.002	0	0						4			Ca=0;Mg=0;Fe''=1.06;Mn=0.94;Co=0;Ni=0.002;Si=1;O=4		29.6116					37.4813	32.8817	1.88591e-05			0.0253119
WallrockFindSolidus	770	orthopyroxene	opx Na0.09Ca0.09Fe''0.19Mg1.54Fe'''0.09Ti0.03Al0.00Si1.97O6																							56.0095	1.11456	6.37578e-05	3.53395		6.29649		29.3996			2.2747	1.37117
WallrockFindSolidus	770	clinopyroxene	cpx Na0.02Ca0.89Fe''0.35Mg0.72Fe'''0.02Ti0.00Al0.01Si2.00O6																							52.9169	0.0361837	0.118626	0.736221		11.2014		12.8057			21.9295	0.255459
WallrockFindSolidus	770	amphibole	cAph Ca0.01Fe6.96Mg0.03Si8O22(OH)2																							48.0459					49.9723		0.130973			0.0501356				1.80071
WallrockFindSolidus	770	feldspar	K0.11Na0.73Ca0.15Al1.15Si2.85O8	2.85		1.15									0.15	0.73	0.11				8			K=0.11;Na=0.73;Ca=0.15;Al=1.15;Si=2.85;O=8		64.1733		22.0718								3.23547	8.53577	1.98366
WallrockFindSolidus	770	feldspar	K0.57Na0.41Ca0.02Al1.02Si2.98O8	2.98		1.02									0.02	0.41	0.57				8			K=0.57;Na=0.41;Ca=0.02;Al=1.02;Si=2.98;O=8		65.9355		19.0991								0.37181	4.66946	9.92412
WallrockFindSolidus	770	quartz	SiO2	1																	2			Si=1;O=2		100
WallrockFindSolidus	770	tridymite	SiO2																							100
WallrockFindSolidus	770	cristobalite	SiO2	1																	2			Si=1;O=2		100
WallrockFindSolidus	770	rutile	TiO2																								100
WallrockFindSolidus	770	spinel	Fe''1.02Mg0.00Fe'''1.95Al0.01Cr0.00Ti0.02O4																								0.613105	0.317909	67.4188		31.6393		0.0109279
WallrockFindSolidus	770	rhm-oxide	Mn0.11Fe''0.82Mg0.06Fe'''0.03Al0.01Ti0.98O3																								52.2675	0.276851	1.69094		39.2577	5.01083	1.4962
WallrockFindSolidus	770	apatite	Ca5(PO4)3OH												15			3	1		1			Ca=15;P=3;O=1;H=1												55.8202			42.3866	1.79319
WallrockFindSolidus	770	fluid	H2O1.00CO20.00											20					2		11			H=2;O=11;CO=20																100
WallrockPrimeSupra	790	orthopyroxene	opx Na0.00Ca0.04Fe''0.91Mg1.02Fe'''0.01Ti0.00Al0.03Si1.98O6																							51.5389	0.0105402	0.758104	0.378447		28.415		17.8644			1.01918	0.0155191
WallrockPrimeSupra	790	clinopyroxene	cpx Na0.03Ca0.86Fe''0.35Mg0.68Fe'''0.04Ti0.02Al0.09Si1.94O6																							51.2938	0.547582	1.91	1.38869		11.1492		12.0874			21.1975	0.425729
WallrockPrimeSupra	790	feldspar	K0.10Na0.71Ca0.19Al1.19Si2.81O8	2.81		1.19									0.19	0.71	0.1				8			K=0.1;Na=0.71;Ca=0.19;Al=1.19;Si=2.81;O=8		63.1993		22.7903								4.05553	8.24902	1.7058
WallrockPrimeSupra	790	feldspar	K0.59Na0.39Ca0.02Al1.02Si2.98O8	2.98		1.02									0.02	0.39	0.59				8			K=0.59;Na=0.39;Ca=0.02;Al=1.02;Si=2.98;O=8		65.7901		19.1405								0.43985	4.45379	10.1758
WallrockPrimeSupra	790	quartz	SiO2	1																	2			Si=1;O=2		100
WallrockPrimeSupra	790	spinel	Fe''1.23Mg0.07Fe'''1.34Al0.05Cr0.00Ti0.30O4																								10.6941	1.18818	47.6147		39.2393		1.26375
WallrockPrimeSupra	790	rhm-oxide	Mn0.07Fe''0.69Mg0.12Fe'''0.21Al0.04Ti0.88O3																								47.4046	1.43309	11.1227		33.5231	3.26366	3.25281
WallrockPrimeSupra	790	apatite	Ca5(PO4)3OH												15			3	1		1			Ca=15;P=3;O=1;H=1												55.8202			42.3866	1.79319
WallrockPrimeSupra	790	fluid	H2O1.00CO20.00											20					2		11			H=2;O=11;CO=20																100
MagmaEquilibrateB	1195.7	olivine	(Ca0.01Mg0.85Fe''0.15Mn0.00Co0.00Ni0.00)2SiO4	1				0.3			1.7	0	0.002	0	0.02						4			Ca=0.02;Mg=1.7;Fe''=0.3;Mn=0;Co=0;Ni=0.002;Si=1;O=4		39.9294					14.2778	0.290384	45.1187			0.383666
MagmaEquilibrateB	1190.7	olivine	(Ca0.01Mg0.85Fe''0.15Mn0.00Co0.00Ni0.00)2SiO4	1				0.3			1.7	0	0.002	0	0.02						4			Ca=0.02;Mg=1.7;Fe''=0.3;Mn=0;Co=0;Ni=0.002;Si=1;O=4		39.8912					14.4755	0.294129	44.9518			0.38732
MagmaEquilibrateB	1185.7	olivine	(Ca0.01Mg0.84Fe''0.15Mn0.00Co0.00Ni0.00)2SiO4	1				0.3			1.68	0	0.002	0	0.02						4			Ca=0.02;Mg=1.68;Fe''=0.3;Mn=0;Co=0;Ni=0.002;Si=1;O=4		39.8524					14.6764	0.297926	44.7823			0.390989
MagmaEquilibrateB	1180.7	olivine	(Ca0.01Mg0.84Fe''0.16Mn0.00Co0.00Ni0.00)2SiO4	1				0.32			1.68	0	0.002	0	0.02						4			Ca=0.02;Mg=1.68;Fe''=0.32;Mn=0;Co=0;Ni=0.002;Si=1;O=4		39.8129					14.8806	0.301778	44.61			0.394677
MagmaEquilibrateB	1175.7	olivine	(Ca0.01Mg0.84Fe''0.16Mn0.00Co0.00Ni0.00)2SiO4	1				0.32			1.68	0	0.002	0	0.02						4			Ca=0.02;Mg=1.68;Fe''=0.32;Mn=0;Co=0;Ni=0.002;Si=1;O=4		39.7729					15.0881	0.305685	44.4349			0.398382
MagmaEquilibrateB	1170.7	olivine	(Ca0.01Mg0.84Fe''0.16Mn0.00Co0.00Ni0.00)2SiO4	1				0.32			1.68	0	0.002	0	0.02						4			Ca=0.02;Mg=1.68;Fe''=0.32;Mn=0;Co=0;Ni=0.002;Si=1;O=4		39.7321					15.2991	0.30965	44.257			0.402107
MagmaEquilibrateB	1165.7	olivine	(Ca0.01Mg0.83Fe''0.16Mn0.00Co0.00Ni0.00)2SiO4	1				0.32			1.66	0	0.002	0	0.02						4			Ca=0.02;Mg=1.66;Fe''=0.32;Mn=0;Co=0;Ni=0.002;Si=1;O=4		39.6907					15.5137	0.313673	44.0761			0.405853
MagmaEquilibrateB	1160.7	olivine	(Ca0.01Mg0.83Fe''0.17Mn0.00Co0.00Ni0.00)2SiO4	1				0.34			1.66	0	0.002	0	0.02						4			Ca=0.02;Mg=1.66;Fe''=0.34;Mn=0;Co=0;Ni=0.002;Si=1;O=4		39.6486					15.7319	0.317756	43.8922			0.409622
MagmaEquilibrateB	1155.7	olivine	(Ca0.01Mg0.83Fe''0.17Mn0.00Co0.00Ni0.00)2SiO4	1				0.34			1.66	0	0.002	0	0.02						4			Ca=0.02;Mg=1.66;Fe''=0.34;Mn=0;Co=0;Ni=0.002;Si=1;O=4		39.6058					15.9538	0.321902	43.7051			0.413414
MagmaEquilibrateB	1150.7	olivine	(Ca0.01Mg0.83Fe''0.17Mn0.00Co0.00Ni0.00)2SiO4	1				0.34			1.66	0	0.002	0	0.02						4			Ca=0.02;Mg=1.66;Fe''=0.34;Mn=0;Co=0;Ni=0.002;Si=1;O=4		39.5622					16.1797	0.326111	43.5148			0.417232
MagmaEquilibrateB	1145.7	olivine	(Ca0.01Mg0.82Fe''0.17Mn0.00Co0.00Ni0.00)2SiO4	1				0.34			1.64	0	0.002	0	0.02						4			Ca=0.02;Mg=1.64;Fe''=0.34;Mn=0;Co=0;Ni=0.002;Si=1;O=4		39.5178					16.4095	0.330385	43.3212			0.421077
MagmaEquilibrateB	1140.7	olivine	(Ca0.01Mg0.82Fe''0.18Mn0.00Co0.00Ni0.00)2SiO4	1				0.36			1.64	0	0.002	0	0.02						4			Ca=0.02;Mg=1.64;Fe''=0.36;Mn=0;Co=0;Ni=0.002;Si=1;O=4		39.4727					16.6434	0.334726	43.1242			0.424952
MagmaEquilibrateB	1135.7	olivine	(Ca0.01Mg0.82Fe''0.18Mn0.00Co0.00Ni0.00)2SiO4	1				0.36			1.64	0	0.002	0	0.02						4			Ca=0.02;Mg=1.64;Fe''=0.36;Mn=0;Co=0;Ni=0.002;Si=1;O=4		39.4268					16.8816	0.339136	42.9237			0.428858
MagmaEquilibrateB	1130.7	olivine	(Ca0.01Mg0.81Fe''0.18Mn0.00Co0.00Ni0.00)2SiO4	1				0.36			1.62	0	0.002	0	0.02						4			Ca=0.02;Mg=1.62;Fe''=0.36;Mn=0;Co=0;Ni=0.002;Si=1;O=4		39.38					17.124	0.343617	42.7195			0.432797
MagmaEquilibrateB	1125.7	olivine	(Ca0.01Mg0.81Fe''0.18Mn0.00Co0.00Ni0.00)2SiO4	1				0.36			1.62	0	0.002	0	0.02						4			Ca=0.02;Mg=1.62;Fe''=0.36;Mn=0;Co=0;Ni=0.002;Si=1;O=4		39.3324					17.371	0.34817	42.5117			0.436771
MagmaEquilibrateB	1120.7	olivine	(Ca0.01Mg0.81Fe''0.19Mn0.00Co0.00Ni0.00)2SiO4	1				0.38			1.62	0	0.002	0	0.02						4			Ca=0.02;Mg=1.62;Fe''=0.38;Mn=0;Co=0;Ni=0.002;Si=1;O=4		39.263					17.7332	0.357463	42.2117			0.434661
MagmaEquilibrateB	1120.7	clinopyroxene	cpx Na0.02Ca0.84Fe''0.16Mg0.86Fe'''0.05Ti0.02Al0.19Si1.87O6																							50.7935	0.635391	4.37666	1.97184		5.049		15.7567			21.1986	0.218426
MagmaEquilibrateB	1115.7	olivine	(Ca0.01Mg0.80Fe''0.19Mn0.00Co0.00Ni0.00)2SiO4	1				0.38			1.6	0	0.002	0	0.02						4			Ca=0.02;Mg=1.6;Fe''=0.38;Mn=0;Co=0;Ni=0.002;Si=1;O=4		39.1717					18.2114	0.371619	41.8184			0.426861
MagmaEquilibrateB	1115.7	clinopyroxene	cpx Na0.02Ca0.83Fe''0.16Mg0.86Fe'''0.06Ti0.02Al0.20Si1.86O6																							50.6381	0.680526	4.50422	2.00523		5.16545		15.6132			21.1675	0.225747
MagmaEquilibrateB	1110.7	olivine	(Ca0.01Mg0.80Fe''0.20Mn0.00Co0.00Ni0.00)2SiO4	1				0.4			1.6	0	0.002	0	0.02						4			Ca=0.02;Mg=1.6;Fe''=0.4;Mn=0;Co=0;Ni=0.002;Si=1;O=4		39.078					18.7015	0.386209	41.415			0.419269
MagmaEquilibrateB	1110.7	clinopyroxene	cpx Na0.02Ca0.83Fe''0.16Mg0.85Fe'''0.06Ti0.02Al0.20Si1.86O6																							50.4791	0.728186	4.63372	2.03874		5.283		15.467			21.1369	0.233283
MagmaEquilibrateB	1105.7	olivine	(Ca0.01Mg0.79Fe''0.21Mn0.00Co0.00Ni0.00)2SiO4	1				0.42			1.58	0	0.002	0	0.02						4			Ca=0.02;Mg=1.58;Fe''=0.42;Mn=0;Co=0;Ni=0.002;Si=1;O=4		38.9819					19.204	0.401251	41.0009			0.411887
MagmaEquilibrateB	1105.7	clinopyroxene	cpx Na0.02Ca0.83Fe''0.17Mg0.84Fe'''0.06Ti0.02Al0.21Si1.85O6																							50.3162	0.778539	4.76531	2.07244		5.40159		15.318			21.1069	0.241041
MagmaEquilibrateB	1100.7	olivine	(Ca0.01Mg0.78Fe''0.21Mn0.00Co0.00Ni0.00)2SiO4	1				0.42			1.56	0	0.002	0	0.02						4			Ca=0.02;Mg=1.56;Fe''=0.42;Mn=0;Co=0;Ni=0.002;Si=1;O=4		38.8831					19.7203	0.416792	40.575			0.404724
MagmaEquilibrateB	1100.7	clinopyroxene	cpx Na0.02Ca0.83Fe''0.17Mg0.83Fe'''0.06Ti0.02Al0.21Si1.85O6																							50.1494	0.831793	4.89844	2.10642		5.52134		15.1661			21.0776	0.249021
MagmaEquilibrateB	1100.7	feldspar	K0.01Na0.31Ca0.68Al1.68Si2.32O8	2.32		1.68									0.68	0.31	0.01				8			K=0.01;Na=0.31;Ca=0.68;Al=1.68;Si=2.32;O=8		51.0473		31.3221								13.9298	3.53585	0.165003
MagmaEquilibrateB	1095.7	olivine	(Ca0.01Mg0.78Fe''0.22Mn0.00Co0.00Ni0.00)2SiO4	1				0.44			1.56	0	0.002	0	0.02						4			Ca=0.02;Mg=1.56;Fe''=0.44;Mn=0;Co=0;Ni=0.002;Si=1;O=4		38.7609					20.3557	0.437205	40.0468			0.399347
MagmaEquilibrateB	1095.7	clinopyroxene	cpx Na0.02Ca0.83Fe''0.18Mg0.83Fe'''0.06Ti0.02Al0.21Si1.85O6																							50.0255	0.890214	4.93021	2.14928		5.66991		15.0336			21.0451	0.256261
MagmaEquilibrateB	1095.7	feldspar	K0.01Na0.32Ca0.67Al1.67Si2.33O8	2.33		1.67									0.67	0.32	0.01				8			K=0.01;Na=0.32;Ca=0.67;Al=1.67;Si=2.33;O=8		51.2857		31.1598								13.7404	3.64187	0.172267
MagmaEquilibrateB	1090.7	olivine	(Ca0.01Mg0.77Fe''0.23Mn0.01Co0.00Ni0.00)2SiO4	1				0.46			1.54	0.02	0.002	0	0.02						4			Ca=0.02;Mg=1.54;Fe''=0.46;Mn=0.02;Co=0;Ni=0.002;Si=1;O=4		38.6355					21.0074	0.458159	39.5048			0.394207
MagmaEquilibrateB	1090.7	clinopyroxene	cpx Na0.02Ca0.83Fe''0.18Mg0.82Fe'''0.06Ti0.03Al0.22Si1.84O6																							49.8938	0.952756	4.96536	2.195		5.81895		14.8951			21.0153	0.263778
MagmaEquilibrateB	1090.7	feldspar	K0.01Na0.33Ca0.66Al1.66Si2.34O8	2.34		1.66									0.66	0.33	0.01				8			K=0.01;Na=0.33;Ca=0.66;Al=1.66;Si=2.34;O=8		51.5275		30.9952								13.5482	3.74928	0.179809
WallrockEquilibrate	789.908	orthopyroxene	opx Na0.00Ca0.04Fe''0.91Mg1.02Fe'''0.01Ti0.00Al0.03Si1.98O6																							51.5351	0.0105122	0.75816	0.378563		28.4294		17.8544			1.01842	0.0155121
WallrockEquilibrate	789.908	clinopyroxene	cpx Na0.03Ca0.86Fe''0.35Mg0.68Fe'''0.04Ti0.02Al0.09Si1.94O6																							51.2935	0.546552	1.90903	1.38875		11.1572		12.0828			21.1964	0.4258
WallrockEquilibrate	789.908	feldspar	K0.10Na0.71Ca0.19Al1.19Si2.81O8	2.81		1.19									0.19	0.71	0.1				8			K=0.1;Na=0.71;Ca=0.19;Al=1.19;Si=2.81;O=8		63.2017		22.7887								4.05364	8.25009	1.70585
WallrockEquilibrate	789.908	feldspar	K0.59Na0.39Ca0.02Al1.02Si2.98O8	2.98		1.02									0.02	0.39	0.59				8			K=0.59;Na=0.39;Ca=0.02;Al=1.02;Si=2.98;O=8		65.7905		19.1402								0.439568	4.45403	10.1757
WallrockEquilibrate	789.908	quartz	SiO2	1																	2			Si=1;O=2		100
WallrockEquilibrate	789.908	spinel	Fe''1.23Mg0.07Fe'''1.34Al0.05Cr0.00Ti0.30O4																								10.6822	1.18822	47.6366		39.2309		1.26199
WallrockEquilibrate	789.908	rhm-oxide	Mn0.07Fe''0.69Mg0.12Fe'''0.21Al0.04Ti0.88O3																								47.3972	1.4328	11.136		33.4799	3.30309	3.25094
WallrockEquilibrate	789.908	apatite	Ca5(PO4)3OH												15			3	1		1			Ca=15;P=3;O=1;H=1												55.8202			42.3866	1.79319
WallrockEquilibrate	789.908	fluid	H2O1.00CO20.00											20					2		11			H=2;O=11;CO=20																100
MagmaEquilibrateB	1085.7	olivine	(Ca0.01Mg0.76Fe''0.24Mn0.01Co0.00Ni0.00)2SiO4	1				0.48			1.52	0.02	0.002	0	0.02						4			Ca=0.02;Mg=1.52;Fe''=0.48;Mn=0.02;Co=0;Ni=0.002;Si=1;O=4		38.5067					21.6763	0.479665	38.948			0.389304
MagmaEquilibrateB	1085.7	clinopyroxene	cpx Na0.02Ca0.83Fe''0.18Mg0.81Fe'''0.06Ti0.03Al0.22Si1.84O6																							49.7535	1.01996	5.0043	2.24386		5.96829		14.7502			20.9883	0.271593
MagmaEquilibrateB	1085.7	feldspar	K0.01Na0.34Ca0.65Al1.65Si2.35O8	2.35		1.65									0.65	0.34	0.01				8			K=0.01;Na=0.34;Ca=0.65;Al=1.65;Si=2.35;O=8		51.7725		30.8285								13.3534	3.85799	0.187644
WallrockEquilibrate	791.436	orthopyroxene	opx Na0.00Ca0.04Fe''0.90Mg1.03Fe'''0.01Ti0.00Al0.03Si1.98O6																							51.6142	0.0110411	0.756954	0.376109		28.1262		18.0668			1.03303	0.0156464
WallrockEquilibrate	791.436	clinopyroxene	cpx Na0.03Ca0.86Fe''0.35Mg0.69Fe'''0.04Ti0.02Al0.09Si1.94O6																							51.3061	0.5654	1.92758	1.38697		10.9833		12.1822			21.2241	0.424339
WallrockEquilibrate	791.436	feldspar	K0.10Na0.71Ca0.19Al1.19Si2.81O8	2.81		1.19									0.19	0.71	0.1				8			K=0.1;Na=0.71;Ca=0.19;Al=1.19;Si=2.81;O=8		63.1506		22.8241								4.09479	8.22893	1.70161
WallrockEquilibrate	791.436	feldspar	K0.59Na0.39Ca0.02Al1.02Si2.98O8	2.98		1.02									0.02	0.39	0.59				8			K=0.59;Na=0.39;Ca=0.02;Al=1.02;Si=2.98;O=8		65.7825		19.1436								0.444185	4.44509	10.1846
WallrockEquilibrate	791.436	quartz	SiO2	1																	2			Si=1;O=2		100
WallrockEquilibrate	791.436	spinel	Fe''1.23Mg0.07Fe'''1.33Al0.05Cr0.00Ti0.31O4																								10.8631	1.18911	47.3052		39.3458		1.29674
WallrockEquilibrate	791.436	rhm-oxide	Mn0.05Fe''0.70Mg0.12Fe'''0.20Al0.04Ti0.88O3																								47.507	1.43953	10.943		34.2038	2.61618	3.29052
WallrockEquilibrate	791.436	apatite	Ca5(PO4)3OH												15			3	1		1			Ca=15;P=3;O=1;H=1												55.8202			42.3866	1.79319
WallrockEquilibrate	791.436	fluid	H2O1.00CO20.00											20					2		11			H=2;O=11;CO=20																100
MagmaEquilibrateB	1080	olivine	(Ca0.01Mg0.75Fe''0.24Mn0.01Co0.00Ni0.00)2SiO4	1				0.48			1.5	0.02	0.002	0	0.02						4			Ca=0.02;Mg=1.5;Fe''=0.48;Mn=0.02;Co=0;Ni=0.002;Si=1;O=4		38.36					22.4359	0.506905	38.3141			0.383175
MagmaEquilibrateB	1080	clinopyroxene	cpx Na0.02Ca0.83Fe''0.19Mg0.81Fe'''0.06Ti0.03Al0.22Si1.84O6																							49.6107	1.08947	5.03423	2.29615		6.14372		14.5987			20.947	0.280042
MagmaEquilibrateB	1080	feldspar	K0.01Na0.35Ca0.64Al1.64Si2.36O8	2.36		1.64									0.64	0.35	0.01				8			K=0.01;Na=0.35;Ca=0.64;Al=1.64;Si=2.36;O=8		52.0562		30.6352								13.1277	3.98363	0.197191
WallrockEquilibrate	792.359	orthopyroxene	opx Na0.00Ca0.04Fe''0.89Mg1.04Fe'''0.01Ti0.00Al0.03Si1.98O6																							51.6891	0.0114569	0.755637	0.373852		27.8406		18.2687			1.04482	0.01576
WallrockEquilibrate	792.359	clinopyroxene	cpx Na0.03Ca0.86Fe''0.34Mg0.69Fe'''0.04Ti0.02Al0.09Si1.94O6																							51.3247	0.579128	1.94215	1.38484		10.8131		12.2788			21.2542	0.423036
WallrockEquilibrate	792.359	feldspar	K0.10Na0.71Ca0.20Al1.20Si2.80O8	2.8		1.2									0.2	0.71	0.1				8			K=0.1;Na=0.71;Ca=0.2;Al=1.2;Si=2.8;O=8		63.1027		22.858								4.13395	8.21117	1.69417
WallrockEquilibrate	792.359	feldspar	K0.59Na0.39Ca0.02Al1.02Si2.98O8	2.98		1.02									0.02	0.39	0.59				8			K=0.59;Na=0.39;Ca=0.02;Al=1.02;Si=2.98;O=8		65.7754		19.1448								0.446848	4.4324	10.2006
WallrockEquilibrate	792.359	quartz	SiO2	1																	2			Si=1;O=2		100
WallrockEquilibrate	792.359	spinel	Fe''1.23Mg0.07Fe'''1.33Al0.05Cr0.00Ti0.31O4																								10.9381	1.1923	47.1726		39.3707		1.32629
WallrockEquilibrate	792.359	rhm-oxide	Mn0.05Fe''0.71Mg0.12Fe'''0.20Al0.04Ti0.88O3																								47.55	1.44649	10.8791		34.6266	2.16825	3.3295
WallrockEquilibrate	792.359	apatite	Ca5(PO4)3OH												15			3	1		1			Ca=15;P=3;O=1;H=1												55.8202			42.3866	1.79319
WallrockEquilibrate	792.359	fluid	H2O1.00CO20.00											20					2		11			H=2;O=11;CO=20																100
MagmaEquilibrateB	1053.92	olivine	(Ca0.00Mg0.71Fe''0.28Mn0.01Co0.00Ni0.00)2SiO4	1				0.56			1.42	0.02	0.002	0	0						4			Ca=0;Mg=1.42;Fe''=0.56;Mn=0.02;Co=0;Ni=0.002;Si=1;O=4		37.7824					25.3877	0.666399	35.824			0.339537
MagmaEquilibrateB	1053.92	clinopyroxene	cpx Na0.02Ca0.81Fe''0.22Mg0.80Fe'''0.07Ti0.03Al0.21Si1.85O6																							49.6721	1.06363	4.68849	2.34065		7.11184		14.4451			20.3806	0.297624
MagmaEquilibrateB	1053.92	feldspar	K0.01Na0.40Ca0.58Al1.58Si2.42O8	2.42		1.58									0.58	0.4	0.01				8			K=0.01;Na=0.4;Ca=0.58;Al=1.58;Si=2.42;O=8		53.3912		29.7238								12.0643	4.56903	0.251717
WallrockEquilibrate	794.445	orthopyroxene	opx Na0.00Ca0.04Fe''0.89Mg1.05Fe'''0.01Ti0.00Al0.03Si1.98O6																							51.7171	0.012066	0.776314	0.379245		27.6917		18.3931			1.01469	0.0157372
WallrockEquilibrate	794.445	feldspar	K0.10Na0.71Ca0.20Al1.20Si2.80O8	2.8		1.2									0.2	0.71	0.1				8			K=0.1;Na=0.71;Ca=0.2;Al=1.2;Si=2.8;O=8		63.0905		22.8637								4.14151	8.19902	1.70522
WallrockEquilibrate	794.445	feldspar	K0.59Na0.39Ca0.02Al1.02Si2.98O8	2.98		1.02									0.02	0.39	0.59				8			K=0.59;Na=0.39;Ca=0.02;Al=1.02;Si=2.98;O=8		65.7724		19.1521								0.453628	4.445	10.1768
WallrockEquilibrate	794.445	quartz	SiO2	1																	2			Si=1;O=2		100
WallrockEquilibrate	794.445	spinel	Fe''1.24Mg0.08Fe'''1.33Al0.05Cr0.00Ti0.31O4																								11.0246	1.21604	46.9924		39.4137		1.35327
WallrockEquilibrate	794.445	rhm-oxide	Mn0.04Fe''0.72Mg0.12Fe'''0.20Al0.04Ti0.88O3																								47.5581	1.47891	10.8509		34.8729	1.87999	3.35918
WallrockEquilibrate	794.445	fluid	H2O1.00CO20.00											20					2		11			H=2;O=11;CO=20																100
MagmaEquilibrateB	1035.13	olivine	(Ca0.00Mg0.68Fe''0.31Mn0.01Co0.00Ni0.00)2SiO4	1				0.62			1.36	0.02	0.002	0	0						4			Ca=0;Mg=1.36;Fe''=0.62;Mn=0.02;Co=0;Ni=0.002;Si=1;O=4		37.3384					27.6575	0.782182	33.9067			0.31523
MagmaEquilibrateB	1035.13	clinopyroxene	cpx Na0.02Ca0.80Fe''0.24Mg0.80Fe'''0.06Ti0.03Al0.19Si1.85O6																							49.7514	1.03223	4.43643	2.31484		7.84495		14.3251			19.986	0.309039
MagmaEquilibrateB	1035.13	feldspar	K0.02Na0.44Ca0.55Al1.55Si2.45O8	2.45		1.55									0.55	0.44	0.02				8			K=0.02;Na=0.44;Ca=0.55;Al=1.55;Si=2.45;O=8		54.3519		29.0666								11.298	4.98723	0.296225
MagmaEquilibrateB	1035.13	spinel	Fe''1.11Mg0.28Fe'''1.02Al0.20Cr0.00Ti0.39O4																								14.6362	4.64778	38.0933		37.3674		5.25539
RechargeEquilibrate	1130	olivine	(Ca0.01Mg0.82Fe''0.18Mn0.00Co0.00Ni0.00)2SiO4	1				0.36			1.64	0	0.002	0	0.02						4			Ca=0.02;Mg=1.64;Fe''=0.36;Mn=0;Co=0;Ni=0.002;Si=1;O=4		39.401					17.0153	0.340505	42.8106			0.43259
MagmaEquilibrateC	1081.01	olivine	(Ca0.01Mg0.76Fe''0.23Mn0.01Co0.00Ni0.00)2SiO4	1				0.46			1.52	0.02	0.002	0	0.02						4			Ca=0.02;Mg=1.52;Fe''=0.46;Mn=0.02;Co=0;Ni=0.002;Si=1;O=4		38.5817					21.2608	0.513754	39.283			0.360691
MagmaEquilibrateC	1081.01	clinopyroxene	cpx Na0.02Ca0.81Fe''0.19Mg0.85Fe'''0.06Ti0.02Al0.19Si1.87O6																							50.5154	0.776542	4.25296	2.09107		6.15261		15.3782			20.581	0.25217
WallrockEquilibrate	798.224	orthopyroxene	opx Na0.00Ca0.04Fe''0.89Mg1.05Fe'''0.01Ti0.00Al0.04Si1.98O6																							51.6777	0.0131012	0.835524	0.396327		27.7222		18.4165			0.923052	0.0155074
WallrockEquilibrate	798.224	feldspar	K0.10Na0.71Ca0.20Al1.20Si2.80O8	2.8		1.2									0.2	0.71	0.1				8			K=0.1;Na=0.71;Ca=0.2;Al=1.2;Si=2.8;O=8		63.1313		22.8276								4.10218	8.19501	1.74398
WallrockEquilibrate	798.224	feldspar	K0.58Na0.39Ca0.02Al1.02Si2.98O8	2.98		1.02									0.02	0.39	0.58				8			K=0.58;Na=0.39;Ca=0.02;Al=1.02;Si=2.98;O=8		65.7752		19.1688								0.466704	4.49498	10.0943
WallrockEquilibrate	798.224	quartz	SiO2	1																	2			Si=1;O=2		100
WallrockEquilibrate	798.224	spinel	Fe''1.24Mg0.08Fe'''1.31Al0.06Cr0.00Ti0.31O4																								11.1663	1.2744	46.6645		39.5152		1.37958
WallrockEquilibrate	798.224	rhm-oxide	Mn0.04Fe''0.72Mg0.12Fe'''0.20Al0.04Ti0.88O3																								47.546	1.5554	10.8086		35.0145	1.69916	3.37641
MagmaEquilibrateB	1070.92	clinopyroxene	cpx Na0.02Ca0.81Fe''0.20Mg0.84Fe'''0.06Ti0.02Al0.19Si1.86O6																							50.3883	0.8135	4.30015	2.12513		6.45973		15.2205			20.43	0.262706
WallrockEquilibrate	806.651	orthopyroxene	opx Na0.00Ca0.04Fe''0.89Mg1.05Fe'''0.01Ti0.00Al0.04Si1.97O6																							51.6565	0.0140425	0.864584	0.414399		27.6999		18.4225			0.912311	0.0156835
WallrockEquilibrate	806.651	feldspar	K0.10Na0.70Ca0.19Al1.19Si2.81O8	2.81		1.19									0.19	0.7	0.1				8			K=0.1;Na=0.7;Ca=0.19;Al=1.19;Si=2.81;O=8		63.1534		22.7974								4.07208	8.16525	1.81186
WallrockEquilibrate	806.651	feldspar	K0.57Na0.40Ca0.02Al1.02Si2.98O8	2.98		1.02									0.02	0.4	0.57				8			K=0.57;Na=0.4;Ca=0.02;Al=1.02;Si=2.98;O=8		65.7708		19.2037								0.496511	4.57659	9.9524
WallrockEquilibrate	806.651	quartz	SiO2	1																	2			Si=1;O=2		100
WallrockEquilibrate	806.651	spinel	Fe''1.24Mg0.08Fe'''1.30Al0.06Cr0.00Ti0.32O4																								11.4443	1.31041	46.1062		39.7215		1.41766
WallrockEquilibrate	806.651	rhm-oxide	Mn0.03Fe''0.72Mg0.12Fe'''0.20Al0.05Ti0.88O3																								47.4982	1.6061	10.8711		34.9651	1.65345	3.40597
MagmaEquilibrateB	1064.15	clinopyroxene	cpx Na0.02Ca0.81Fe''0.21Mg0.83Fe'''0.06Ti0.02Al0.19Si1.86O6																							50.2377	0.860114	4.39178	2.16318		6.65097		15.0532			20.3707	0.272379
WallrockEquilibrate	814.687	orthopyroxene	opx Na0.00Ca0.04Fe''0.88Mg1.05Fe'''0.01Ti0.00Al0.04Si1.97O6																							51.6365	0.0149836	0.892354	0.431884		27.6764		18.4294			0.902608	0.0158513
WallrockEquilibrate	814.687	feldspar	K0.11Na0.70Ca0.19Al1.19Si2.81O8	2.81		1.19									0.19	0.7	0.11				8			K=0.11;Na=0.7;Ca=0.19;Al=1.19;Si=2.81;O=8		63.1774		22.766								4.04059	8.13644	1.87955
WallrockEquilibrate	814.687	feldspar	K0.57Na0.41Ca0.03Al1.03Si2.97O8	2.97		1.03									0.03	0.41	0.57				8			K=0.57;Na=0.41;Ca=0.03;Al=1.03;Si=2.97;O=8		65.7652		19.2386								0.526623	4.65546	9.81419
WallrockEquilibrate	814.687	quartz	SiO2	1																	2			Si=1;O=2		100
WallrockEquilibrate	814.687	spinel	Fe''1.25Mg0.08Fe'''1.28Al0.06Cr0.00Ti0.33O4																								11.7141	1.34486	45.5649		39.9211		1.45492
WallrockEquilibrate	814.687	rhm-oxide	Mn0.03Fe''0.72Mg0.13Fe'''0.20Al0.05Ti0.88O3																								47.4537	1.65518	10.9279		34.9216	1.60784	3.43386
MagmaEquilibrateB	1057.49	clinopyroxene	cpx Na0.02Ca0.81Fe''0.21Mg0.82Fe'''0.06Ti0.03Al0.20Si1.86O6																							50.0846	0.90839	4.48429	2.20157		6.84257		14.8819			20.3143	0.282345
WallrockEquilibrate	822.893	orthopyroxene	opx Na0.00Ca0.04Fe''0.88Mg1.05Fe'''0.01Ti0.00Al0.04Si1.97O6																							51.6165	0.0159898	0.920758	0.449972		27.6499		18.4377			0.893144	0.0160224
WallrockEquilibrate	822.893	feldspar	K0.11Na0.70Ca0.19Al1.19Si2.81O8	2.81		1.19									0.19	0.7	0.11				8			K=0.11;Na=0.7;Ca=0.19;Al=1.19;Si=2.81;O=8		63.2051		22.731								4.00529	8.10656	1.95196
WallrockEquilibrate	822.893	feldspar	K0.56Na0.42Ca0.03Al1.03Si2.97O8	2.97		1.03									0.03	0.42	0.56				8			K=0.56;Na=0.42;Ca=0.03;Al=1.03;Si=2.97;O=8		65.7578		19.276								0.55921	4.73724	9.66973
WallrockEquilibrate	822.893	quartz	SiO2	1																	2			Si=1;O=2		100
WallrockEquilibrate	822.893	spinel	Fe''1.25Mg0.08Fe'''1.27Al0.06Cr0.00Ti0.34O4																								11.9944	1.38015	45.0035		40.1279		1.49396
WallrockEquilibrate	822.893	rhm-oxide	Mn0.03Fe''0.72Mg0.13Fe'''0.20Al0.05Ti0.87O3																								47.4092	1.70604	10.983		34.8806	1.55916	3.46208
MagmaEquilibrateB	1050.82	olivine	(Ca0.00Mg0.72Fe''0.27Mn0.01Co0.00Ni0.00)2SiO4	1				0.54			1.44	0.02	0.002	0	0						4			Ca=0;Mg=1.44;Fe''=0.54;Mn=0.02;Co=0;Ni=0.002;Si=1;O=4		37.9214					24.6746	0.649371	36.4331			0.32155
MagmaEquilibrateB	1050.82	clinopyroxene	cpx Na0.02Ca0.80Fe''0.22Mg0.82Fe'''0.06Ti0.03Al0.20Si1.86O6																							50.0079	0.943541	4.4683	2.23077		7.10036		14.7818			20.1771	0.290172
MagmaEquilibrateB	1050.82	feldspar	K0.02Na0.41Ca0.58Al1.58Si2.42O8	2.42		1.58									0.58	0.41	0.02				8			K=0.02;Na=0.41;Ca=0.58;Al=1.58;Si=2.42;O=8		53.5602		29.6076								11.9291	4.64111	0.262041
WallrockEquilibrate	832.536	orthopyroxene	opx Na0.00Ca0.04Fe''0.88Mg1.05Fe'''0.01Ti0.00Al0.04Si1.97O6																							51.5935	0.0172332	0.954199	0.471503		27.6155		18.4493			0.88243	0.0162233
WallrockEquilibrate	832.536	feldspar	K0.12Na0.70Ca0.19Al1.19Si2.81O8	2.81		1.19									0.19	0.7	0.12				8			K=0.12;Na=0.7;Ca=0.19;Al=1.19;Si=2.81;O=8		63.2424		22.6857								3.95918	8.0708	2.04189
WallrockEquilibrate	832.536	feldspar	K0.55Na0.42Ca0.03Al1.03Si2.97O8	2.97		1.03									0.03	0.42	0.55				8			K=0.55;Na=0.42;Ca=0.03;Al=1.03;Si=2.97;O=8		65.7471		19.3225								0.600106	4.83535	9.49491
WallrockEquilibrate	832.536	quartz	SiO2	1																	2			Si=1;O=2		100
WallrockEquilibrate	832.536	spinel	Fe''1.26Mg0.09Fe'''1.25Al0.06Cr0.00Ti0.35O4																								12.3299	1.42175	44.3326		40.3745		1.54122
WallrockEquilibrate	832.536	rhm-oxide	Mn0.03Fe''0.71Mg0.13Fe'''0.20Al0.05Ti0.87O3																								47.3582	1.76684	11.044		34.837	1.49898	3.49497
MagmaEquilibrateB	1043.92	olivine	(Ca0.00Mg0.71Fe''0.28Mn0.01Co0.00Ni0.00)2SiO4	1				0.56			1.42	0.02	0.002	0	0						4			Ca=0;Mg=1.42;Fe''=0.56;Mn=0.02;Co=0;Ni=0.002;Si=1;O=4		37.7378					25.622	0.68611	35.6394			0.314697
MagmaEquilibrateB	1043.92	clinopyroxene	cpx Na0.02Ca0.80Fe''0.23Mg0.81Fe'''0.06Ti0.03Al0.19Si1.85O6																							49.9063	0.986155	4.45235	2.2811		7.35612		14.6379			20.0811	0.298936
MagmaEquilibrateB	1043.92	feldspar	K0.02Na0.42Ca0.56Al1.56Si2.44O8	2.44		1.56									0.56	0.42	0.02				8			K=0.02;Na=0.42;Ca=0.56;Al=1.56;Si=2.44;O=8		53.9305		29.3544								11.6337	4.80252	0.278853
WallrockEquilibrate	842.201	orthopyroxene	opx Na0.00Ca0.04Fe''0.88Mg1.05Fe'''0.01Ti0.00Al0.04Si1.97O6																							51.5712	0.0185474	0.987745	0.493341		27.5773		18.4634			0.872073	0.0164245
WallrockEquilibrate	842.201	feldspar	K0.12Na0.69Ca0.19Al1.19Si2.81O8	2.81		1.19									0.19	0.69	0.12				8			K=0.12;Na=0.69;Ca=0.19;Al=1.19;Si=2.81;O=8		63.2854		22.6352								3.90749	8.03404	2.13793
WallrockEquilibrate	842.201	feldspar	K0.54Na0.43Ca0.03Al1.03Si2.97O8	2.97		1.03									0.03	0.43	0.54				8			K=0.54;Na=0.43;Ca=0.03;Al=1.03;Si=2.97;O=8		65.7338		19.3723								0.644225	4.93619	9.31347
WallrockEquilibrate	842.201	quartz	SiO2	1																	2			Si=1;O=2		100
WallrockEquilibrate	842.201	spinel	Fe''1.27Mg0.09Fe'''1.22Al0.06Cr0.00Ti0.36O4																								12.6727	1.46357	43.6483		40.6253		1.59014
WallrockEquilibrate	842.201	rhm-oxide	Mn0.03Fe''0.71Mg0.13Fe'''0.20Al0.05Ti0.87O3																								47.3084	1.82891	11.1013		34.7983	1.43535	3.52772
MagmaEquilibrateB	1037.08	olivine	(Ca0.00Mg0.70Fe''0.30Mn0.01Co0.00Ni0.00)2SiO4	1				0.6			1.4	0.02	0.002	0	0						4			Ca=0;Mg=1.4;Fe''=0.6;Mn=0.02;Co=0;Ni=0.002;Si=1;O=4		37.5487					26.5978	0.723827	34.8215			0.30823
MagmaEquilibrateB	1037.08	clinopyroxene	cpx Na0.02Ca0.80Fe''0.24Mg0.80Fe'''0.07Ti0.03Al0.19Si1.85O6																							49.8037	1.02817	4.43419	2.33386		7.61888		14.4898			19.9835	0.307871
MagmaEquilibrateB	1037.08	feldspar	K0.02Na0.43Ca0.55Al1.55Si2.45O8	2.45		1.55									0.55	0.43	0.02				8			K=0.02;Na=0.43;Ca=0.55;Al=1.55;Si=2.45;O=8		54.3038		29.0989								11.3358	4.96458	0.296914
WallrockEquilibrate	852.014	orthopyroxene	opx Na0.00Ca0.04Fe''0.88Mg1.05Fe'''0.01Ti0.00Al0.05Si1.97O6																							51.5493	0.0199546	1.02182	0.515739		27.5344		18.4803			0.8618	0.0166287
WallrockEquilibrate	852.014	feldspar	K0.13Na0.69Ca0.18Al1.18Si2.82O8	2.82		1.18									0.18	0.69	0.13				8			K=0.13;Na=0.69;Ca=0.18;Al=1.18;Si=2.82;O=8		63.3354		22.5779								3.84857	7.99557	2.24248
WallrockEquilibrate	852.014	feldspar	K0.53Na0.44Ca0.03Al1.03Si2.97O8	2.97		1.03									0.03	0.44	0.53				8			K=0.53;Na=0.44;Ca=0.03;Al=1.03;Si=2.97;O=8		65.7176		19.4264								0.692642	5.04176	9.12166
WallrockEquilibrate	852.014	quartz	SiO2	1																	2			Si=1;O=2		100
WallrockEquilibrate	852.014	spinel	Fe''1.27Mg0.09Fe'''1.20Al0.07Cr0.00Ti0.36O4																								13.0272	1.50614	42.9418		40.8834		1.64153
WallrockEquilibrate	852.014	rhm-oxide	Mn0.03Fe''0.71Mg0.13Fe'''0.21Al0.05Ti0.87O3																								47.2592	1.89316	11.1555		34.7642	1.367	3.56085
MagmaEquilibrateB	1030.19	olivine	(Ca0.00Mg0.68Fe''0.31Mn0.01Co0.00Ni0.00)2SiO4	1				0.62			1.36	0.02	0.002	0	0						4			Ca=0;Mg=1.36;Fe''=0.62;Mn=0.02;Co=0;Ni=0.002;Si=1;O=4		37.3704					27.5102	0.76682	34.0503			0.302297
MagmaEquilibrateB	1030.19	clinopyroxene	cpx Na0.02Ca0.79Fe''0.25Mg0.80Fe'''0.06Ti0.03Al0.19Si1.86O6																							49.8803	1.01687	4.32448	2.25374		7.8797		14.4559			19.8775	0.311484
MagmaEquilibrateB	1030.19	feldspar	K0.02Na0.45Ca0.53Al1.53Si2.47O8	2.47		1.53									0.53	0.45	0.02				8			K=0.02;Na=0.45;Ca=0.53;Al=1.53;Si=2.47;O=8		54.7033		28.8252								11.0168	5.13736	0.317287
MagmaEquilibrateB	1030.19	spinel	Fe''1.12Mg0.28Fe'''1.02Al0.19Cr0.00Ti0.40O4																								14.8258	4.49018	37.9142		37.5115		5.25836
MagmaEquilibrateB	1030.19	apatite	Ca5(PO4)3OH												15			3	1		1			Ca=15;P=3;O=1;H=1												55.8202			42.3866	1.79319
WallrockEquilibrate	862.216	orthopyroxene	opx Na0.00Ca0.03Fe''0.88Mg1.05Fe'''0.02Ti0.00Al0.05Si1.97O6																							51.5276	0.0214995	1.05725	0.53922		27.485		18.5014			0.851204	0.0168413
WallrockEquilibrate	862.216	feldspar	K0.13Na0.69Ca0.18Al1.18Si2.82O8	2.82		1.18									0.18	0.69	0.13				8			K=0.13;Na=0.69;Ca=0.18;Al=1.18;Si=2.82;O=8		63.3957		22.5109								3.77921	7.95404	2.36018
WallrockEquilibrate	862.216	feldspar	K0.51Na0.45Ca0.04Al1.04Si2.96O8	2.96		1.04									0.04	0.45	0.51				8			K=0.51;Na=0.45;Ca=0.04;Al=1.04;Si=2.96;O=8		65.6974		19.4871								0.747447	5.15582	8.91232
WallrockEquilibrate	862.216	quartz	SiO2	1																	2			Si=1;O=2		100
WallrockEquilibrate	862.216	spinel	Fe''1.28Mg0.09Fe'''1.18Al0.07Cr0.00Ti0.38O4																								13.4025	1.55051	42.1951		41.155		1.6969
WallrockEquilibrate	862.216	rhm-oxide	Mn0.03Fe''0.71Mg0.13Fe'''0.21Al0.06Ti0.87O3																								47.2095	1.96134	11.2078		34.7347	1.2914	3.59527
MagmaEquilibrateB	1023.34	olivine	(Ca0.00Mg0.67Fe''0.32Mn0.01Co0.00Ni0.00)2SiO4	1				0.64			1.34	0.02	0.002	0	0						4			Ca=0;Mg=1.34;Fe''=0.64;Mn=0.02;Co=0;Ni=0.002;Si=1;O=4		37.1947					28.4052	0.813484	33.2903			0.296292
MagmaEquilibrateB	1023.34	clinopyroxene	cpx Na0.02Ca0.79Fe''0.25Mg0.80Fe'''0.06Ti0.03Al0.18Si1.86O6																							49.9956	0.991352	4.19164	2.15143		8.15174		14.4517			19.7528	0.313664
MagmaEquilibrateB	1023.34	feldspar	K0.02Na0.46Ca0.52Al1.52Si2.48O8	2.48		1.52									0.52	0.46	0.02				8			K=0.02;Na=0.46;Ca=0.52;Al=1.52;Si=2.48;O=8		55.1154		28.5424								10.6874	5.31434	0.340463
MagmaEquilibrateB	1023.34	spinel	Fe''1.15Mg0.27Fe'''0.99Al0.18Cr0.00Ti0.42O4																								15.5048	4.24063	36.8017		38.3712		5.08167
MagmaEquilibrateB	1023.34	apatite	Ca5(PO4)3OH												15			3	1		1			Ca=15;P=3;O=1;H=1												55.8202			42.3866	1.79319
WallrockEquilibrate	872.766	orthopyroxene	opx Na0.00Ca0.03Fe''0.88Mg1.05Fe'''0.02Ti0.00Al0.05Si1.97O6																							51.5066	0.0231899	1.09387	0.563654		27.4281		18.5274			0.84014	0.0170621
WallrockEquilibrate	872.766	feldspar	K0.14Na0.68Ca0.18Al1.18Si2.82O8	2.82		1.18									0.18	0.68	0.14				8			K=0.14;Na=0.68;Ca=0.18;Al=1.18;Si=2.82;O=8		63.4684		22.4319								3.69705	7.90894	2.49373
WallrockEquilibrate	872.766	feldspar	K0.50Na0.46Ca0.04Al1.04Si2.96O8	2.96		1.04									0.04	0.46	0.5				8			K=0.5;Na=0.46;Ca=0.04;Al=1.04;Si=2.96;O=8		65.6724		19.5556								0.809787	5.2797	8.68259
WallrockEquilibrate	872.766	quartz	SiO2	1																	2			Si=1;O=2		100
WallrockEquilibrate	872.766	spinel	Fe''1.29Mg0.10Fe'''1.16Al0.07Cr0.00Ti0.39O4																								13.7975	1.59649	41.4108		41.4388		1.75643
WallrockEquilibrate	872.766	rhm-oxide	Mn0.03Fe''0.71Mg0.13Fe'''0.21Al0.06Ti0.87O3																								47.1595	2.03341	11.2576		34.711	1.20759	3.63099
MagmaEquilibrateB	1016.43	olivine	(Ca0.00Mg0.66Fe''0.33Mn0.01Co0.00Ni0.00)2SiO4	1				0.66			1.32	0.02	0.002	0	0						4			Ca=0;Mg=1.32;Fe''=0.66;Mn=0.02;Co=0;Ni=0.002;Si=1;O=4		37.0148					29.3213	0.861461	32.5122			0.290279
MagmaEquilibrateB	1016.43	clinopyroxene	cpx Na0.02Ca0.78Fe''0.26Mg0.80Fe'''0.06Ti0.03Al0.18Si1.87O6																							50.1162	0.960481	4.05272	2.05046		8.44155		14.4516			19.6116	0.315349
MagmaEquilibrateB	1016.43	feldspar	K0.02Na0.48Ca0.50Al1.50Si2.50O8	2.5		1.5									0.5	0.48	0.02				8			K=0.02;Na=0.48;Ca=0.5;Al=1.5;Si=2.5;O=8		55.5331		28.2553								10.3531	5.49242	0.366121
MagmaEquilibrateB	1016.43	spinel	Fe''1.17Mg0.26Fe'''0.96Al0.17Cr0.00Ti0.44O4																								16.1732	4.00274	35.6994		39.2134		4.91132
MagmaEquilibrateB	1016.43	apatite	Ca5(PO4)3OH												15			3	1		1			Ca=15;P=3;O=1;H=1												55.8202			42.3866	1.79319
WallrockEquilibrate	882.997	orthopyroxene	opx Na0.00Ca0.03Fe''0.87Mg1.06Fe'''0.02Ti0.00Al0.05Si1.97O6																							51.4878	0.0249255	1.12935	0.587444		27.3666		18.5575			0.829114	0.0172779
WallrockEquilibrate	882.997	feldspar	K0.15Na0.68Ca0.17Al1.17Si2.83O8	2.83		1.17									0.17	0.68	0.15				8			K=0.15;Na=0.68;Ca=0.17;Al=1.17;Si=2.83;O=8		63.5511		22.3438								3.60507	7.8623	2.63775
WallrockEquilibrate	882.997	feldspar	K0.49Na0.47Ca0.04Al1.04Si2.96O8	2.96		1.04									0.04	0.47	0.49				8			K=0.49;Na=0.47;Ca=0.04;Al=1.04;Si=2.96;O=8		65.6435		19.6288								0.876971	5.40737	8.44337
WallrockEquilibrate	882.997	quartz	SiO2	1																	2			Si=1;O=2		100
WallrockEquilibrate	882.997	spinel	Fe''1.30Mg0.10Fe'''1.14Al0.07Cr0.00Ti0.40O4																								14.1869	1.64117	40.6392		41.7162		1.81655
WallrockEquilibrate	882.997	rhm-oxide	Mn0.02Fe''0.71Mg0.13Fe'''0.21Al0.06Ti0.87O3																								47.1122	2.10492	11.302		34.6951	1.11986	3.66591
MagmaEquilibrateB	1009.65	orthopyroxene	opx Na0.00Ca0.08Fe''0.55Mg1.32Fe'''0.02Ti0.00Al0.07Si1.95O6																							53.2844	0.0825217	1.69837	0.705324		18.0959		24.1733			1.93302	0.0271639
MagmaEquilibrateB	1009.65	clinopyroxene	cpx Na0.02Ca0.78Fe''0.27Mg0.80Fe'''0.06Ti0.03Al0.17Si1.87O6																							50.1836	0.947799	3.94444	1.97155		8.6909		14.3715			19.5719	0.318278
MagmaEquilibrateB	1009.65	feldspar	K0.02Na0.49Ca0.48Al1.48Si2.52O8	2.52		1.48									0.48	0.49	0.02				8			K=0.02;Na=0.49;Ca=0.48;Al=1.48;Si=2.52;O=8		55.9146		27.9923								10.047	5.65295	0.393186
MagmaEquilibrateB	1009.65	spinel	Fe''1.20Mg0.25Fe'''0.93Al0.16Cr0.00Ti0.45O4																								16.8566	3.77063	34.5547		40.0894		4.72871
MagmaEquilibrateB	1009.65	apatite	Ca5(PO4)3OH												15			3	1		1			Ca=15;P=3;O=1;H=1												55.8202			42.3866	1.79319
WallrockEquilibrate	893.022	orthopyroxene	opx Na0.00Ca0.03Fe''0.87Mg1.06Fe'''0.02Ti0.00Al0.05Si1.96O6																							51.4712	0.0267254	1.16406	0.610786		27.2994		18.5926			0.817749	0.0174922
WallrockEquilibrate	893.022	feldspar	K0.16Na0.67Ca0.17Al1.17Si2.83O8	2.83		1.17									0.17	0.67	0.16				8			K=0.16;Na=0.67;Ca=0.17;Al=1.17;Si=2.83;O=8		63.6469		22.2434								3.49989	7.81266	2.79712
WallrockEquilibrate	893.022	feldspar	K0.47Na0.48Ca0.05Al1.05Si2.95O8	2.95		1.05									0.05	0.48	0.47				8			K=0.47;Na=0.48;Ca=0.05;Al=1.05;Si=2.95;O=8		65.6097		19.709								0.950963	5.54227	8.18808
WallrockEquilibrate	893.022	quartz	SiO2	1																	2			Si=1;O=2		100
WallrockEquilibrate	893.022	spinel	Fe''1.30Mg0.10Fe'''1.11Al0.07Cr0.00Ti0.41O4																								14.574	1.68501	39.8737		41.9894		1.87797
WallrockEquilibrate	893.022	rhm-oxide	Mn0.02Fe''0.71Mg0.13Fe'''0.21Al0.06Ti0.86O3																								47.067	2.17665	11.342		34.6874	1.02629	3.70059
MagmaEquilibrateB	1002.98	orthopyroxene	opx Na0.00Ca0.08Fe''0.57Mg1.30Fe'''0.02Ti0.00Al0.07Si1.95O6																							53.2008	0.0771661	1.64052	0.673138		18.6394		23.8134			1.92864	0.0269379
MagmaEquilibrateB	1002.98	clinopyroxene	cpx Na0.02Ca0.78Fe''0.28Mg0.79Fe'''0.05Ti0.03Al0.17Si1.87O6																							50.2193	0.945765	3.85208	1.91126		8.90335		14.2421			19.604	0.322135
MagmaEquilibrateB	1002.98	feldspar	K0.02Na0.51Ca0.47Al1.47Si2.53O8	2.53		1.47									0.47	0.51	0.02				8			K=0.02;Na=0.51;Ca=0.47;Al=1.47;Si=2.53;O=8		56.2781		27.7409								9.7548	5.80409	0.422085
MagmaEquilibrateB	1002.98	spinel	Fe''1.23Mg0.24Fe'''0.91Al0.15Cr0.00Ti0.47O4																								17.4886	3.54555	33.4974		40.929		4.53947
MagmaEquilibrateB	1002.98	apatite	Ca5(PO4)3OH												15			3	1		1			Ca=15;P=3;O=1;H=1												55.8202			42.3866	1.79319
WallrockEquilibrate	902.674	orthopyroxene	opx Na0.00Ca0.03Fe''0.87Mg1.06Fe'''0.02Ti0.00Al0.05Si1.96O6																							51.4574	0.0285609	1.19744	0.633237		27.2269		18.6329			0.805959	0.0177029
WallrockEquilibrate	902.674	feldspar	K0.17Na0.67Ca0.16Al1.16Si2.84O8	2.84		1.16									0.16	0.67	0.17				8			K=0.17;Na=0.67;Ca=0.16;Al=1.16;Si=2.84;O=8		63.7572		22.1293								3.38002	7.75935	2.9741
WallrockEquilibrate	902.674	feldspar	K0.45Na0.50Ca0.05Al1.05Si2.95O8	2.95		1.05									0.05	0.5	0.45				8			K=0.45;Na=0.5;Ca=0.05;Al=1.05;Si=2.95;O=8		65.5707		19.7966								1.03239	5.68509	7.91521
WallrockEquilibrate	902.674	quartz	SiO2	1																	2			Si=1;O=2		100
WallrockEquilibrate	902.674	spinel	Fe''1.31Mg0.11Fe'''1.09Al0.08Cr0.00Ti0.42O4																								14.9514	1.72729	39.1288		42.2528		1.93974
WallrockEquilibrate	902.674	rhm-oxide	Mn0.02Fe''0.71Mg0.14Fe'''0.21Al0.06Ti0.86O3																								47.0242	2.24741	11.378		34.6885	0.927232	3.73466
MagmaEquilibrateB	996.381	orthopyroxene	opx Na0.00Ca0.08Fe''0.59Mg1.29Fe'''0.02Ti0.00Al0.07Si1.96O6																							53.1125	0.0721517	1.58559	0.643358		19.1909		23.4501			1.91876	0.0266696
MagmaEquilibrateB	996.381	feldspar	K0.03Na0.52Ca0.46Al1.46Si2.54O8	2.54		1.46									0.46	0.52	0.03				8			K=0.03;Na=0.52;Ca=0.46;Al=1.46;Si=2.54;O=8		56.6423		27.4885								9.46158	5.954	0.453581
MagmaEquilibrateB	996.381	spinel	Fe''1.26Mg0.23Fe'''0.88Al0.14Cr0.00Ti0.49O4																								18.107	3.33558	32.4533		41.7448		4.35931
MagmaEquilibrateB	996.381	apatite	Ca5(PO4)3OH												15			3	1		1			Ca=15;P=3;O=1;H=1												55.8202			42.3866	1.79319
RechargeEquilibrate	1080	orthopyroxene	opx Na0.00Ca0.03Fe''0.08Mg1.80Fe'''0.06Ti0.01Al0.09Si1.92O6																							55.8684	0.315244	2.29251	2.42813		2.87497		35.2464			0.934028	0.0403334
RechargeEquilibrate	1080	clinopyroxene	cpx Na0.03Ca0.83Fe''0.04Mg0.94Fe'''0.12Ti0.02Al0.16Si1.86O6																							50.8654	0.695326	3.65283	4.40374		1.45655		17.1942			21.2852	0.446776
RechargeEquilibrate	1080	feldspar	K0.06Na0.57Ca0.37Al1.37Si2.63O8	2.63		1.37									0.37	0.57	0.06				8			K=0.06;Na=0.57;Ca=0.37;Al=1.37;Si=2.63;O=8		58.7135		25.96								7.71726	6.56217	1.04713
RechargeEquilibrate	1080	spinel	Fe''0.23Mg0.84Fe'''1.63Al0.23Cr0.00Ti0.07O4																								2.8502	5.8569	65.8764		8.19869		17.2178
RechargeEquilibrate	1080	whitlockite	Ca3(PO4)2																																	54.2384			45.7616
MagmaEquilibrateC	1021.31	orthopyroxene	opx Na0.00Ca0.06Fe''0.35Mg1.53Fe'''0.03Ti0.00Al0.07Si1.95O6																							54.699	0.114714	1.71739	1.07863		11.919		28.804			1.63476	0.0325311
MagmaEquilibrateC	1021.31	clinopyroxene	cpx Na0.03Ca0.80Fe''0.17Mg0.87Fe'''0.08Ti0.02Al0.16Si1.87O6																							50.7772	0.75023	3.72056	2.72442		5.56572		15.7745			20.3289	0.358466
MagmaEquilibrateC	1021.31	feldspar	K0.03Na0.52Ca0.45Al1.45Si2.55O8	2.55		1.45									0.45	0.52	0.03				8			K=0.03;Na=0.52;Ca=0.45;Al=1.45;Si=2.55;O=8		56.8658		27.3248								9.27442	6.02284	0.512138
MagmaEquilibrateC	1021.31	spinel	Fe''0.85Mg0.34Fe'''1.43Al0.19Cr0.00Ti0.19O4																								7.1219	4.48312	53.4299		28.5242		6.44085
WallrockEquilibrate	911.964	orthopyroxene	opx Na0.00Ca0.03Fe''0.87Mg1.06Fe'''0.02Ti0.00Al0.06Si1.96O6																							51.4466	0.030434	1.2295	0.654773		27.1481		18.6792			0.793398	0.0179124
WallrockEquilibrate	911.964	feldspar	K0.18Na0.66Ca0.15Al1.15Si2.85O8	2.85		1.15									0.15	0.66	0.18				8			K=0.18;Na=0.66;Ca=0.15;Al=1.15;Si=2.85;O=8		63.8865		21.9968								3.24053	7.69985	3.17639
WallrockEquilibrate	911.964	feldspar	K0.44Na0.51Ca0.05Al1.05Si2.95O8	2.95		1.05									0.05	0.51	0.44				8			K=0.44;Na=0.51;Ca=0.05;Al=1.05;Si=2.95;O=8		65.5247		19.8949								1.12424	5.84033	7.61581
WallrockEquilibrate	911.964	quartz	SiO2	1																	2			Si=1;O=2		100
WallrockEquilibrate	911.964	spinel	Fe''1.32Mg0.11Fe'''1.07Al0.08Cr0.00Ti0.43O4																								15.3184	1.76803	38.4061		42.5054		2.002
WallrockEquilibrate	911.964	rhm-oxide	Mn0.02Fe''0.71Mg0.14Fe'''0.21Al0.07Ti0.86O3																								46.9831	2.31724	11.4112		34.6989	0.821112	3.76838
MagmaEquilibrateB	1014.8	orthopyroxene	opx Na0.00Ca0.06Fe''0.37Mg1.52Fe'''0.03Ti0.00Al0.07Si1.95O6																							54.6786	0.109772	1.64642	1.03083		12.2738		28.5768			1.65117	0.0325918
MagmaEquilibrateB	1014.8	clinopyroxene	cpx Na0.03Ca0.81Fe''0.18Mg0.86Fe'''0.07Ti0.02Al0.16Si1.88O6																							50.8179	0.765576	3.63959	2.66447		5.67666		15.7122			20.3603	0.36333
MagmaEquilibrateB	1014.8	feldspar	K0.03Na0.54Ca0.43Al1.43Si2.57O8	2.57		1.43									0.43	0.54	0.03				8			K=0.03;Na=0.54;Ca=0.43;Al=1.43;Si=2.57;O=8		57.2278		27.0728								8.982	6.16886	0.548545
MagmaEquilibrateB	1014.8	spinel	Fe''0.87Mg0.33Fe'''1.42Al0.18Cr0.00Ti0.20O4																								7.46232	4.23184	52.9292		29.1934		6.18325
WallrockEquilibrate	923.138	orthopyroxene	opx Na0.00Ca0.03Fe''0.86Mg1.06Fe'''0.02Ti0.00Al0.06Si1.96O6																							51.4085	0.0315387	1.27421	0.696558		27.1053		18.6909			0.77481	0.0182069
WallrockEquilibrate	923.138	feldspar	K0.20Na0.66Ca0.14Al1.14Si2.86O8	2.86		1.14									0.14	0.66	0.2				8			K=0.2;Na=0.66;Ca=0.14;Al=1.14;Si=2.86;O=8		64.0844		21.7937								3.02683	7.60859	3.48648
WallrockEquilibrate	923.138	feldspar	K0.41Na0.53Ca0.06Al1.06Si2.94O8	2.94		1.06									0.06	0.53	0.41				8			K=0.41;Na=0.53;Ca=0.06;Al=1.06;Si=2.94;O=8		65.4514		20.0422								1.26282	6.06315	7.1804
WallrockEquilibrate	923.138	quartz	SiO2	1																	2			Si=1;O=2		100
WallrockEquilibrate	923.138	spinel	Fe''1.31Mg0.11Fe'''1.08Al0.08Cr0.00Ti0.42O4																								15.0496	1.84871	38.8462		42.2237		2.03174
MagmaEquilibrateB	1007.96	orthopyroxene	opx Na0.00Ca0.06Fe''0.38Mg1.51Fe'''0.03Ti0.00Al0.07Si1.95O6																							54.6433	0.103983	1.57249	0.982939		12.6977		28.3037			1.66331	0.0325609
MagmaEquilibrateB	1007.96	feldspar	K0.03Na0.55Ca0.42Al1.42Si2.58O8	2.58		1.42									0.42	0.55	0.03				8			K=0.03;Na=0.55;Ca=0.42;Al=1.42;Si=2.58;O=8		57.6308		26.7912								8.65566	6.32876	0.593548
MagmaEquilibrateB	1007.96	spinel	Fe''0.90Mg0.31Fe'''1.41Al0.17Cr0.00Ti0.21O4																								7.82728	3.9702	52.3767		29.9312		5.89468
WallrockEquilibrate	934.594	orthopyroxene	opx Na0.00Ca0.03Fe''0.87Mg1.06Fe'''0.02Ti0.00Al0.06Si1.96O6																							51.3288	0.030252	1.33104	0.771286		27.1334		18.6405			0.745985	0.0186539
WallrockEquilibrate	934.594	feldspar	K0.21Na0.65Ca0.14Al1.14Si2.86O8	2.86		1.14									0.14	0.65	0.21				8			K=0.21;Na=0.65;Ca=0.14;Al=1.14;Si=2.86;O=8		64.2457		21.644								2.86568	7.57562	3.66898
WallrockEquilibrate	934.594	quartz	SiO2	1																	2			Si=1;O=2		100
WallrockEquilibrate	934.594	spinel	Fe''1.27Mg0.11Fe'''1.16Al0.09Cr0.00Ti0.38O4																								13.5015	1.99699	41.6355		40.8791		1.98683
MagmaEquilibrateB	1001.27	orthopyroxene	opx Na0.00Ca0.06Fe''0.39Mg1.49Fe'''0.03Ti0.00Al0.06Si1.95O6																							54.5938	0.0977725	1.50246	0.938329		13.1644		28.0022			1.6685	0.0324425
MagmaEquilibrateB	1001.27	feldspar	K0.04Na0.56Ca0.40Al1.40Si2.60O8	2.6		1.4									0.4	0.56	0.04				8			K=0.04;Na=0.56;Ca=0.4;Al=1.4;Si=2.6;O=8		58.0456		26.5003								8.31887	6.49047	0.644736
MagmaEquilibrateB	1001.27	spinel	Fe''0.92Mg0.30Fe'''1.40Al0.16Cr0.00Ti0.22O4																								8.1826	3.72517	51.8196		30.6733		5.59935
WallrockEquilibrate	945.602	orthopyroxene	opx Na0.00Ca0.03Fe''0.86Mg1.06Fe'''0.02Ti0.00Al0.06Si1.96O6																							51.2637	0.0284102	1.38859	0.853025		27.098		18.6429			0.706043	0.0192643
WallrockEquilibrate	945.602	feldspar	K0.20Na0.67Ca0.14Al1.14Si2.86O8	2.86		1.14									0.14	0.67	0.2				8			K=0.2;Na=0.67;Ca=0.14;Al=1.14;Si=2.86;O=8		64.258		21.6859								2.89738	7.7129	3.44579
WallrockEquilibrate	945.602	quartz	SiO2	1																	2			Si=1;O=2		100
WallrockEquilibrate	945.602	spinel	Fe''1.22Mg0.11Fe'''1.25Al0.09Cr0.00Ti0.33O4																								11.8124	2.16766	44.6751		39.3947		1.95007
MagmaEquilibrateB	994.839	orthopyroxene	opx Na0.00Ca0.06Fe''0.41Mg1.48Fe'''0.02Ti0.00Al0.06Si1.96O6																							54.5304	0.0913207	1.43798	0.89772		13.668		27.6761			1.66623	0.0322423
MagmaEquilibrateB	994.839	feldspar	K0.04Na0.58Ca0.38Al1.38Si2.62O8	2.62		1.38									0.38	0.58	0.04				8			K=0.04;Na=0.58;Ca=0.38;Al=1.38;Si=2.62;O=8		58.4625		26.2068								7.97947	6.64996	0.701296
MagmaEquilibrateB	994.839	spinel	Fe''0.95Mg0.28Fe'''1.39Al0.15Cr0.00Ti0.23O4																								8.51571	3.50236	51.2795		31.3978		5.30464
WallrockEquilibrate	956.168	orthopyroxene	opx Na0.00Ca0.03Fe''0.86Mg1.06Fe'''0.03Ti0.00Al0.07Si1.95O6																							51.2163	0.0255283	1.44943	0.946424		26.9674		18.712			0.662889	0.0200126
WallrockEquilibrate	956.168	feldspar	K0.18Na0.68Ca0.14Al1.14Si2.86O8	2.86		1.14									0.14	0.68	0.18				8			K=0.18;Na=0.68;Ca=0.14;Al=1.14;Si=2.86;O=8		64.2676		21.7436								2.94269	7.88541	3.16074
WallrockEquilibrate	956.168	quartz	SiO2	1																	2			Si=1;O=2		100
WallrockEquilibrate	956.168	spinel	Fe''1.17Mg0.11Fe'''1.35Al0.10Cr0.00Ti0.27O4																								9.8077	2.38272	48.2743		37.6173		1.91804
MagmaEquilibrateB	988.706	orthopyroxene	opx Na0.00Ca0.06Fe''0.43Mg1.46Fe'''0.02Ti0.00Al0.06Si1.96O6																							54.4434	0.0842228	1.37907	0.86203		14.2475		27.3008			1.65094	0.0319257
MagmaEquilibrateB	988.706	feldspar	K0.04Na0.59Ca0.37Al1.37Si2.63O8	2.63		1.37									0.37	0.59	0.04				8			K=0.04;Na=0.59;Ca=0.37;Al=1.37;Si=2.63;O=8		58.9017		25.8962								7.62077	6.81453	0.766778
MagmaEquilibrateB	988.706	spinel	Fe''0.97Mg0.27Fe'''1.38Al0.14Cr0.00Ti0.24O4																								8.80096	3.29771	50.8005		32.1095		4.99138
WallrockEquilibrate	974.094	orthopyroxene	opx Na0.00Ca0.03Fe''0.85Mg1.07Fe'''0.03Ti0.00Al0.07Si1.95O6																							51.1764	0.0259603	1.54772	1.01559		26.7484		18.8138			0.650967	0.0212274
WallrockEquilibrate	974.094	feldspar	K0.18Na0.68Ca0.14Al1.14Si2.86O8	2.86		1.14									0.14	0.68	0.18				8			K=0.18;Na=0.68;Ca=0.14;Al=1.14;Si=2.86;O=8		64.2585		21.7645								2.96214	7.92001	3.09485
WallrockEquilibrate	974.094	spinel	Fe''1.15Mg0.11Fe'''1.36Al0.12Cr0.00Ti0.26O4																								9.38327	2.64946	48.8189		37.1581		1.99033
MagmaEquilibrateB	983.627	orthopyroxene	opx Na0.00Ca0.06Fe''0.44Mg1.45Fe'''0.02Ti0.00Al0.06Si1.96O6																							54.4102	0.0808173	1.33488	0.829991		14.5519		27.0985			1.6619	0.0318172
MagmaEquilibrateB	983.627	feldspar	K0.05Na0.60Ca0.36Al1.36Si2.64O8	2.64		1.36									0.36	0.6	0.05				8			K=0.05;Na=0.6;Ca=0.36;Al=1.36;Si=2.64;O=8		59.1428		25.7249								7.4231	6.90264	0.806563
MagmaEquilibrateB	983.627	spinel	Fe''0.99Mg0.26Fe'''1.37Al0.13Cr0.00Ti0.25O4																								9.1101	3.1637	50.2815		32.6012		4.8435
WallrockEquilibrate	991.684	orthopyroxene	opx Na0.00Ca0.03Fe''0.84Mg1.08Fe'''0.03Ti0.00Al0.07Si1.95O6																							51.1483	0.0267074	1.65535	1.07898		26.4748		18.9531			0.640152	0.0225328
WallrockEquilibrate	991.684	feldspar	K0.17Na0.69Ca0.14Al1.14Si2.86O8	2.86		1.14									0.14	0.69	0.17				8			K=0.17;Na=0.69;Ca=0.14;Al=1.14;Si=2.86;O=8		64.2445		21.7852								2.98245	7.9432	3.04459
WallrockEquilibrate	991.684	spinel	Fe''1.14Mg0.11Fe'''1.37Al0.13Cr0.00Ti0.25O4																								9.08341	2.95362	49.0874		36.7975		2.07809

## Sheet: XTASChartData
x	y	x	y	x	y	x	y	x	y	x	y	x	y	x	y	SiO2	Alk
A		B		C		D		E		F		G		H		I
XTASChartData!$A$4:$A$15	XTASChartData!$B$4:$B$15	XTASChartData!$C$4:$C$5	XTASChartData!$D$4:$D$5	XTASChartData!$E$4:$E$5	XTASChartData!$F$4:$F$5	XTASChartData!$G$4:$G$9	XTASChartData!$H$4:$H$9	XTASChartData!$I$4:$I$7	XTASChartData!$J$4:$J$7	XTASChartData!$K$4:$K$7	XTASChartData!$L$4:$L$7	XTASChartData!$M$4:$M$7	XTASChartData!$N$4:$N$7	XTASChartData!$O$4:$O$5	XTASChartData!$P$4:$P$5
41	0.5	57.6	11.7	41	3	45	5	45	9.4	48.4	11.5	52.4	14	69	8
41	3	61	13.5	45	3	52	5	49.4	7.3	53	9.3	57.6	11.7	69	14
41	7					57	5.9	52	5	57	5.9	63	7
45	9.4					63	7	52	0.5	57	0.5	63	0.5
48.4	11.5					69	8
52.4	14					77.5	0.5
57.6	11.7
53	9.3
49.4	7.3
45	5
45	3
45	0.5
Left	Top	height	width	Name	Caption
63	22.6	630	900	Chart 1	aaaaa
554	469	18	65	TextBox 28	Andesite
324	532	18	60		Basalt
447	495	36	60		Basaltic andesite
420	350	48	60	TextBox 23	Basaltic Trachy- andesite
270	350	18	60	TextBox 20	Basanite
700	420	18	60	TextBox 27	Dacite
484	124	18	100		Phonolite
322	264	18	80	TextBox 21	Phonotephrite
231.111	518.11	36	45		Picro- basalt
790	300	18	100	TextBox 26	Rhyolite
400	197	18	100		Tephriphonolite
346	395	36	50	TextBox 22	Trachy- basalt
493	310	18	100	TextBox 24	Trachyandesite
620	243	18	60	TextBox 25	Trachyte

[truncated: 8 more sheets: XChartDiagramsData, XChartData, Summary2, MassChase, StartingConditions, Snapshot, Summary, RunHistory]
